# Supplementary material for: Photoacid-catalyzed acetalization of carbonyls with alcohols
Source: Royal Society of Chemistry journal article supplement (doi:10.1039/d2ob00435f), 2022-01-01

# Photoacid-catalyzed acetalization of carbonyls with alcohols

Jason Saway, Abigail F. Pierre and Joseph J. Badillo\*

Department of Chemistry & Biochemistry, Seton Hall University, 400 South Orange Ave, South Orange, NJ, USA

Contact: [joseph.badillo@shu.edu](mailto:joseph.badillo@shu.edu)

## Table of Contents:

|       |                                                                                |    |
|-------|--------------------------------------------------------------------------------|----|
| I.    | General information.....                                                       | 2  |
| II.   | General procedures for the photoacid catalyzed acetalization of carbonyls..... | 2  |
| III.  | Additional catalyst, substrate, and control reactions.....                     | 4  |
| IV.   | Characterization data.....                                                     | 7  |
| V.    | Photosensitizer procedure and mechanistic studies.....                         | 14 |
| VI.   | Initiation kinetics and NMR evidence for photogenerated strong acid.....       | 20 |
| VII.  | Determination of excited state pKas and lifetimes.....                         | 25 |
| VIII. | Kessil LED set-up and emission spectra.....                                    | 38 |
| IX.   | Spectra.....                                                                   | 41 |

## I. General information:

<sup>1</sup>H NMR spectra were recorded on a Varian Inova (500 MHz) spectrometer, and chemical shifts were reported in ppm relative to tetramethylsilane (TMS). Data for <sup>1</sup>H NMR are reported as follows: chemical shift ( $\delta$  ppm), multiplicity (s = singlet; d = doublet; dd = doublet of doublets; ddd = doublet of doublet of doublets; m = multiplet), coupling constant (Hz), and integration. Data for <sup>13</sup>C NMR spectra were recorded on a Varian Inova (125 MHz) spectrometer, chemical shifts are reported in ppm relative to the solvent (CDCl<sub>3</sub> as d = 77.2 ppm). High-resolution mass spectra (HRMS) were obtained using a Waters Q-TOF Ultima ESI (electrospray ionization) and are reported in m/z. Silica gel high-purity, pore size 60, particle size 40–63  $\mu$ m, 230–400 mesh was used for flash column chromatography. Rotary evaporation was performed using a Buchi R-300 rotary evaporator and Welch Model 2027 dry vacuum pump. Carbonyl reagents and catalysts **3**, **4**, **5**, **F<sub>2</sub>Irpc**, and **S2** were purchased from commercial sources and used without further purification. Thiourea **2** was prepared according to literature.<sup>1</sup>

## II. General procedures for the photoacid catalyzed acetalization of carbonyls:

### Procedure A:

To an 8 mL vial fitted with a magnetic stir bar was added 6-bromo-2-naphthol (0.011g, 0.05 mmol, 0.1 equiv.) and the corresponding alcohol (1 mL). Next, the carbonyl compound was added (0.5 mmol, 1.0 equiv.) The reaction mixture was then sparged for 5 min, sealed, and placed 4.0 cm from a 40 W Blue LED light (Kessil Tuna Blue) for 18 h. Cooling fans were used to maintain room temperature. To the reaction was then added 5,6-dibromo-1,2-benzodioxole (0.5 mmol) and 250  $\mu$ L of dioxane (to solubilize the std.). An aliquot was then taken up, dissolved in CDCl<sub>3</sub>, and analyzed by <sup>1</sup>H NMR.

### Column free acetal isolation and catalyst recovery:

#### Procedure B:

##### Acetal isolation:

The reaction mixture was transferred into a separatory funnel using 5 mL of diethyl ether. Saturated aqueous sodium bisulfite (10 mL) was added, and the mixture was shaken vigorously for approximately 1 min (Figure S1, A). The organic layer was washed with 3 X 10 mL 1 M NaOH, dried over MgSO<sub>4</sub>, filtered, and concentrated in vacuo to give the acetal (Figure S1, B).

##### Recovery of catalyst **3**:

Concentrated HCl was added to NaOH (aq) layer (from Figure S1, B) until pH 7 (Figure S1, C). Afterward, 2 X 10 mL of diethyl ether was added. Then the organic layer was collected and dried over MgSO<sub>4</sub>, filtered, and concentrated in vacuo to give **3** as a white solid in up to 96% yield. Note: If needed **3** can be run through a SiO<sub>2</sub> plug with hexanes/ethyl acetate to remove trace impurities.

---

<sup>1</sup> Larsen, D.; Langhorn, L. M.; Akselsen, O. M.; Nielsen, B. E.; Pittelkow, M. *Chem. Sci.* **2017**, *8*, 7978.

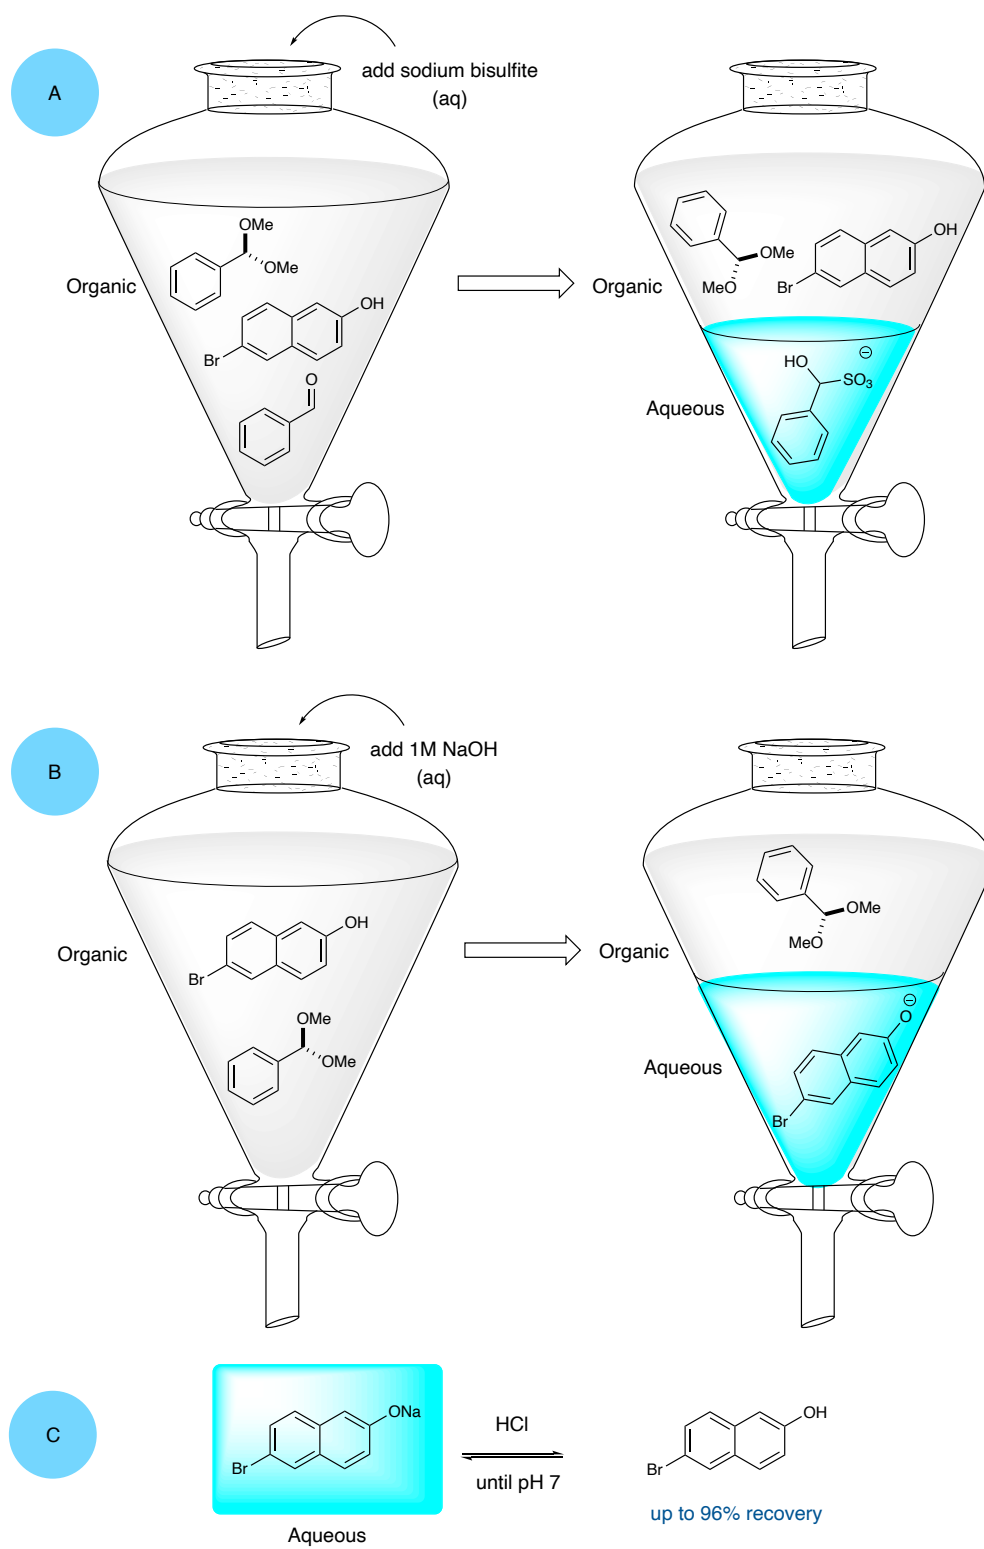

**Figure S1:** Column free isolation of acetals and recovery of catalyst **3**.

### III. Additional catalyst, substrate, and control reactions:

Iridium catalyst **S1** gives no product (Scheme S1). Ruthenium catalyst **S2** gives **7** in 94% yield and dibromo-BINOL **S3** gives **7** in 76% yield. Note: **S1** gives up to 40% yield of acetal **13** via triplet energy transfer with **5** (vide infra).

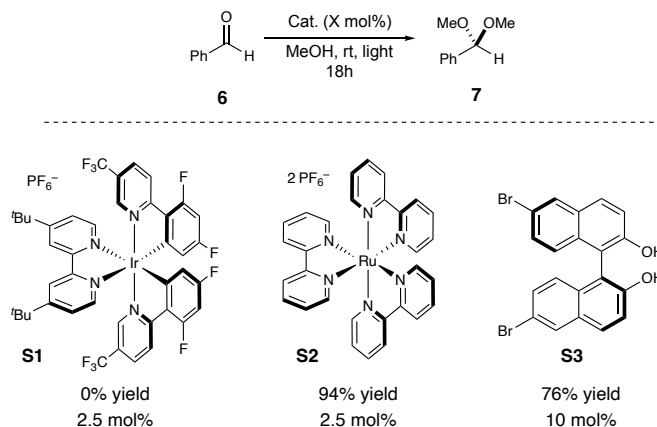

**Scheme S1:** Reactions run according to modified procedure A.

In general, sterically hindered and more complicated alcohol substrates did not work well using photocatalyst **3**. (Scheme S2).

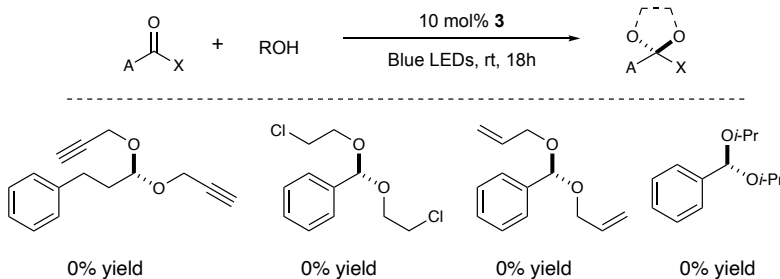

**Scheme S2:** Unsuccessful substrates run according to procedure A.

In the case of benzaldehyde (**6**) aerobic (reaction run open to air) photoirradiation in the absence of a catalyst provides **7** in 90% efficiency (Scheme S3, A). This phenomenon is only observed for benzaldehyde with methanol, when ethanol is used compound **S4** is not observed. Additionally, acetals **14** and **18** are not formed in the absence of catalyst with methanol. Also, acetal **14** was formed in 90% yield with 10 mol% **3** left open to air, suggesting that the triplet excited state of **3** may not be important for the reaction to proceed (Scheme S3, B). Note that purification of benzaldehyde by washing with  $\text{NaOH}_{(\text{aq})}$ , Sat.  $\text{Na}_2\text{SO}_3$ , drying over  $\text{MgSO}_4$ , and freshly distilling had no effect on reaction efficiency with 10 mol% **3** under argon or without catalyst open to air, **7** was formed in 80-90% efficiency.<sup>2</sup>

<sup>2</sup> Armarego, W. L. F.; Chai, C. *Purification of Laboratory Chemicals, 5th Edition*; Butterworth-Heinemann, 2003.

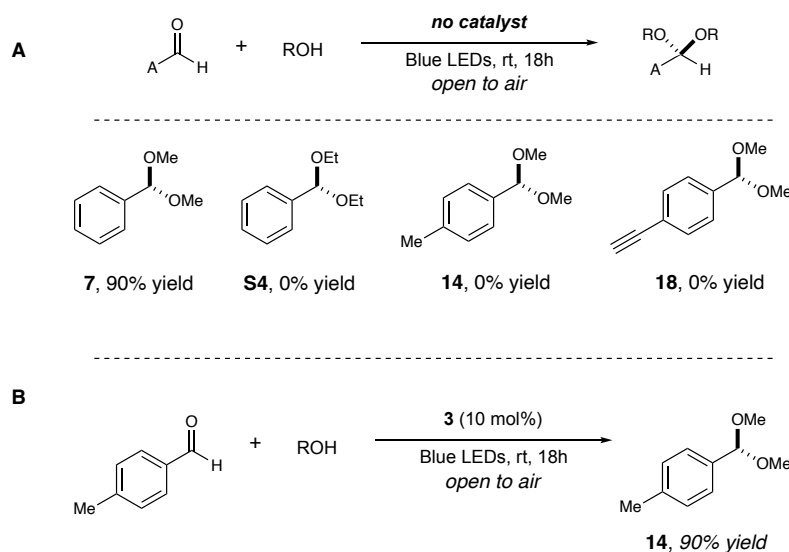

**Scheme S3:** Reactions run according to modified procedure **A**, no sparge, and left open to air. <sup>a</sup>Run with 390 nm LEDs. <sup>b</sup>Run with 370 nm LEDs.

It is possible that benzoic acid is being generated under the reaction conditions, however, when 10 mol% benzoic acid was used with and without light only 40 and 50% yield was observed, respectively (Table S1, Entries 1 and 2). The addition of 5 mol% triethylamine (TEA) shut down the standard reaction (with 10 mol% **3**), however 4-chlorobenzaldehyde proceeds in 68% yield with 5 mol% TEA in the absence of a catalyst (Entries 3 and 4). The addition of 15 mol% triethylamine shut down the reaction with 4-chlorobenzaldehyde in the absence of **3**, suggesting that the mechanism is indeed acid-catalyzed (Entry 5). Finally, the addition of 5 mol% sodium bicarbonate shut down the standard reaction and the reaction with 4-chlorobenzaldehyde (Entries 6 and 7).

| Entry | X  | Cat.     | additive                  | light     | %yield |
|-------|----|----------|---------------------------|-----------|--------|
| 1     | H  | —        | 10 mol% benzoic acid      | Blue LEDs | 40     |
| 2     | H  | —        | 10 mol% benzoic acid      | —         | 50     |
| 3     | H  | <b>3</b> | 5 mol% NEt <sub>3</sub>   | Blue LEDs | 0      |
| 4     | Cl | —        | 5 mol% NEt <sub>3</sub>   | Blue LEDs | 68     |
| 5     | Cl | —        | 15 mol% NEt <sub>3</sub>  | Blue LEDs | 0      |
| 6     | H  | <b>3</b> | 5 mol% NaHCO <sub>3</sub> | Blue LEDs | 0      |
| 7     | Cl | —        | 5 mol% NaHCO <sub>3</sub> | Blue LEDs | 0      |

**Table S1:** Reactions run with 0.5 mmol aldehyde in MeOH (0.5 M), under argon atmosphere, % yields based on <sup>1</sup>H NMR using an internal standard: 5,6-dibromo-1,3-benzodioxole.

To better understand the catalyst free formation of halogen containing acetals we purified 4-bromobenzaldehyde via recrystallization. Regardless of whether the reaction contained catalyst or was open to air, product was formed in 90-92% yield (Entries 1-4, Table S2).

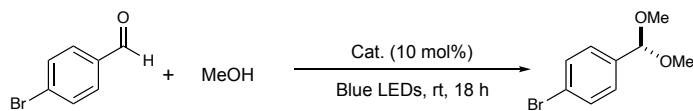

| Entry | Cat. | Conditions  | %yield |
|-------|------|-------------|--------|
| 1     | 3    | Open to Air | 90     |
| 2     | 3    | Under Argon | 90     |
| 3     | —    | Open to Air | 90     |
| 4     | —    | Under Argon | 92     |

**Table S2:** Reactions run with 0.5 mmol 4-bromobenzaldehyde (freshly recrystallized) in MeOH (0.5 M), % yields based on <sup>1</sup>H NMR using an internal standard: 5,6-dibromo-1,3-benzodioxole.

It is worth noting that we observed inconsistent results depending on the batch of methanol used (Table S3). Several “dry” bottles of AcroSeal<sup>®</sup> methanol were shipped from the vendor leaking, and thus were assumed not to be dry, and provided no product (Entries 1 and 2). Others appeared to be sealed, however, no reaction was observed, even after subsequent drying with 5 Å mol sieves (Entries 3 and 4). Ultimately, it was determined that methanol dried over activated 5 Å MS and subsequent bulb-to-bulb distillation under argon via a short path condenser provided consistent results, Entry 7.

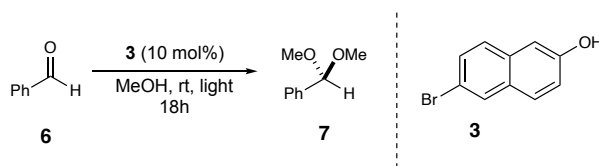

| Entry | MeOH Source           | Part - Lot #                 | % yield | Comments                      |
|-------|-----------------------|------------------------------|---------|-------------------------------|
| 1     | AcroSeal <sup>®</sup> | 36439-B0539396A <sup>b</sup> | 0       | Shipped from vendor leaking   |
| 2     | AcroSeal <sup>®</sup> | 36439-B0538002A <sup>b</sup> | 0       | Shipped from vendor leaking   |
| 3     | AcroSeal <sup>®</sup> | 36439-B0539396A <sup>b</sup> | 0       | Not leaking                   |
| 4     | AcroSeal <sup>®</sup> | 61098-B0535263               | 0       | Dried over 5 Å mol sieves     |
| 5     | AcroSeal <sup>®</sup> | 61098-B0542325C              | 91      | Not leaking                   |
| 6     | Macron                | 3016-16-0000178672           | 13      | Dried over 5 Å mol sieves     |
| 7     | Macron                | 3016-16-0000178672           | 90      | Distilled over 5 Å mol sieves |

**Table S3:** <sup>a</sup>Conditions: Carbonyl compound (0.5 mmol) in the corresponding alcohol (0.5 M), under argon atmosphere, % yields based on <sup>1</sup>H NMR using an internal standard: 5,6-dibromo-1,3-benzodioxole. <sup>b</sup>LOT #s: B0539396A and B0538002A shipped over mol sieves from vendor.

#### IV. Compound characterization:

All compounds are consistent with the reported literature.<sup>3,4,5,6,7,8,9,10,11,12</sup>

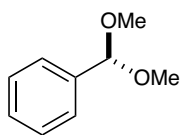

(dimethoxymethyl)benzene **7**: Compound **7** was prepared according to the general procedure **A** and purified according to procedure **B** to give a pale-yellow oil, 0.067g, 83% yield. <sup>1</sup>H NMR (500 MHz, CDCl<sub>3</sub>) δ 7.48 – 7.42 (m, 2H), 7.39 – 7.29 (m, 3H), 5.39 (s, 1H), 3.33 (s, 6H).

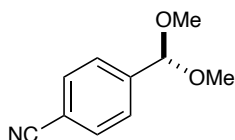

4-(dimethoxymethyl)benzonitrile **8**: Compound **8** was prepared according to the general procedure **A**, 86% yield as determined by <sup>1</sup>H NMR spectroscopy using 5,6-dibromo-1,3-benzodioxole as an internal standard. give <sup>1</sup>H NMR (500 MHz, CDCl<sub>3</sub>) δ 7.67 (d, *J* = 8.3 Hz, 2H), 7.58 (d, *J* = 8.1 Hz, 2H), 5.43 (s, 1H), 3.33 (s, 6H). <sup>13</sup>C NMR (125 MHz, CDCl<sub>3</sub>) δ 143.31, 132.22, 127.71, 118.84, 112.43, 101.85, 52.83.

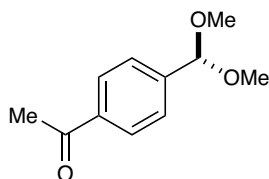

1-(4-(dimethoxymethyl)phenyl)ethan-1-one **9**: Compound **9** was prepared according to modified general procedure **A**, using 0.25 mmol aldehyde, 20 mol% **3**, 0.33 M MeOH:dioxane (2:1), to give 44% yield as determined by <sup>1</sup>H NMR spectroscopy using 5,6-dibromo-1,3-benzodioxole as an internal standard. <sup>1</sup>H NMR (500 MHz, CDCl<sub>3</sub>) δ 7.97 (d, *J* = 7.4 Hz, 2H), 7.56 (d, *J* = 7.3 Hz, 2H), 5.45 (s, 1H), 3.34 (s, 6H), 2.62 (s, 3H).

<sup>3</sup> Cho, E. J.; Senecal, T. D.; Kinzel, T.; Zhang, Y.; Watson, D. A.; Buchwald, S. L. *Science* **2010**, 328, 1679.

<sup>4</sup> Fujioka, H.; Goto, A.; Otake, K.; Kubo, O.; Sawama, Y.; Maegawa, T. *Chem. Commun.* **2011**, 47, 9894.

<sup>5</sup> Knauber, T.; Arikan, F.; Roesenthaler, G.-V.; Goossen, L. J. *Chem. Eur. J.* **2011**, 17, 2689.

<sup>6</sup> Li, G.-Q.; Shan, W.-G.; Su, W.-K.; Yao, Z.-J. *Chin. J. Chem.* **2007**, 25, 90.

<sup>7</sup> Loft, K. J.; Bojarova, P.; Slamova, K.; Kren, V.; Williams, S. J. *ChemBioChem* **2009**, 10, 565.

<sup>8</sup> Sakai, N.; Moritaka, K.; Konakahara, T. *Eur. J. Org. Chem.* **2009**, 4123.

<sup>9</sup> Zhao, Y.-J.; Chng, S.-S.; Loh, T.-P. *J. Am. Chem. Soc.* **2007**, 129, 492.

<sup>10</sup> Spiliopoulou, N.; Nikitas, N. F.; Kokotos, C. G. *Green Chem.* **2020**, 22, 3539.

<sup>11</sup> De, S. K.; Gibbs, R. A. *Tetrahedron Lett.* **2004**, 45, 8141.

<sup>12</sup> Kumar, R.; Chakraborti, A. K. C. *Tetrahedron Lett.* **2005**, 46 (48), 8319-8323.

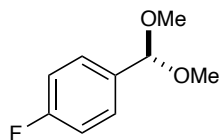

1-(dimethoxymethyl)-4-fluorobenzene **10**: Compound **10** was prepared according to the general procedure **A**, 76% yield as determined by  $^1\text{H}$  NMR spectroscopy using 5,6-dibromo-1,3-benzodioxole as an internal standard.  $^1\text{H}$  NMR (500 MHz,  $\text{CDCl}_3$ )  $\delta$  7.45 – 7.38 (m, 2H), 7.05 (t,  $J = 8.7$  Hz, 2H), 5.37 (s, 1H), 3.32 (s, 6H).  $^{13}\text{C}$  NMR (125 MHz,  $\text{CDCl}_3$ )  $\delta$  162.91 (d,  $J_{\text{FC}} = 246.3$  Hz), 134.11 (d,  $J_{\text{FCCC}} = 3.2$  Hz), 128.63 (d,  $J_{\text{FCCC}} = 8.2$  Hz), 115.21 (d,  $J_{\text{FCC}} = 21.2$  Hz), 102.63, 52.76.

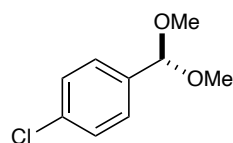

1-chloro-4-(dimethoxymethyl)benzene **11**: Compound **11** was prepared according to the general procedure **A** and purified according to procedure **B** to give a pale-yellow oil, 0.060g, 64% yield.  $^1\text{H}$  NMR (500 MHz,  $\text{CDCl}_3$ )  $\delta$  7.38 (d,  $J = 8.3$  Hz, 2H), 7.33 (d,  $J = 8.5$  Hz, 2H), 5.37 (s, 1H), 3.30 (s, 3H).  $^{13}\text{C}$  NMR (125 MHz,  $\text{CDCl}_3$ )  $\delta$  136.73, 134.32, 128.45, 128.26, 102.34, 52.60. HRMS (ESI)  $m/z$   $[\text{M} + \text{H}]$  calcd for  $\text{C}_9\text{H}_{12}\text{ClO}_2$ , 186.0451 found 186.0448.

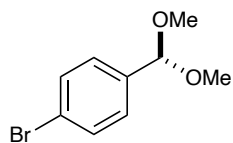

1-bromo-4-(dimethoxymethyl)benzene **12**: Compound **12** was prepared according to the general procedure **A**, 90% yield as determined by  $^1\text{H}$  NMR spectroscopy using 5,6-dibromo-1,3-benzodioxole as an internal standard.  $^1\text{H}$  NMR (500 MHz,  $\text{CDCl}_3$ )  $\delta$  7.49 (d,  $J = 8.5$  Hz, 2H), 7.32 (d,  $J = 8.5$  Hz, 2H), 5.35 (s, 1H), 3.30 (s, 6H).  $^{13}\text{C}$  NMR (125 MHz,  $\text{CDCl}_3$ )  $\delta$  137.25, 131.45, 128.63, 122.61, 102.40, 52.67. HRMS (ESI)  $m/z$   $[\text{M} + \text{H}]$  calcd for  $\text{C}_9\text{H}_{11}\text{BrO}_2$ , 229.9942; found 229.9932.

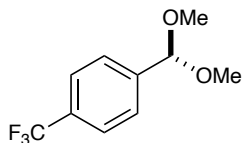

1-(dimethoxymethyl)-4-(trifluoromethyl)benzene **13**: Compound **13** was prepared according to the general procedure **A**, 94% yield as determined by  $^1\text{H}$  NMR spectroscopy using 5,6-dibromo-1,3-benzodioxole as an internal standard.  $^1\text{H}$  NMR (500 MHz,  $\text{CDCl}_3$ )  $\delta$  7.63 (d,  $J = 8.2$  Hz, 2H), 7.58 (d,  $J = 8.2$  Hz, 2H), 5.44 (s, 1H), 3.33 (s, 6H).  $^{13}\text{C}$  NMR (125 MHz,  $\text{CDCl}_3$ )  $\delta$  142.14, 130.73 (q,  $J_{\text{FCC}} = 32.3$  Hz), 127.30, 125.26 (q,  $J_{\text{FCCC}} = 3.5$  Hz), 124.29 (q,  $J_{\text{FC}} = 272.0$  Hz,  $\text{CF}_3$ ), 102.27, 52.70.



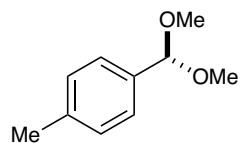

1-(dimethoxymethyl)-4-methylbenzene **14**: Compound **14** was prepared according to the general procedure **A** and purified according to procedure **B** to give a pale-yellow oil, 0.065g, 74% yield.  $^1\text{H}$  NMR (500 MHz,  $\text{CDCl}_3$ )  $\delta$  7.33 (d,  $J = 7.4$  Hz, 2H), 7.17 (d,  $J = 7.7$  Hz, 2H), 5.36 (s, 1H), 3.32 (s, 6H), 2.35 (s, 3H).  $^{13}\text{C}$  NMR (125 MHz,  $\text{CDCl}_3$ )  $\delta$  138.27, 135.25, 128.99, 126.72, 103.33, 52.75, 21.32. HRMS (ESI)  $m/z$  [ $M + H$ ] calcd for  $\text{C}_{10}\text{H}_{15}\text{O}_2$ , 166.0994 found 166.0994.

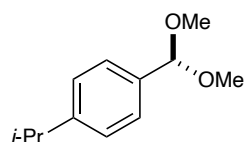

1-(dimethoxymethyl)-4-isopropylbenzene **15**: Compound **15** was prepared according to the general procedure **A**, 77% yield as determined by  $^1\text{H}$  NMR spectroscopy using 5,6-dibromo-1,3-benzodioxole as an internal standard.  $^1\text{H}$  NMR (500 MHz,  $\text{CDCl}_3$ )  $\delta$  7.36 (d,  $J = 6.9$  Hz, 2H), 7.22 (d,  $J = 8.5$  Hz, 2H), 5.35 (s, 1H), 3.33 (s, 6H), 3.00 – 2.80 (m, 1H), 1.25 (d,  $J = 6.9$  Hz, 6H).  $^{13}\text{C}$  NMR (125 MHz,  $\text{CDCl}_3$ )  $\delta$  149.31, 135.65, 126.76, 126.40, 103.53, 52.95, 34.03, 24.11. HRMS (ESI)  $m/z$  [ $M + H$ ] calcd for  $\text{C}_{12}\text{H}_{19}\text{O}_2$ , 194.1307 found 194.1303.

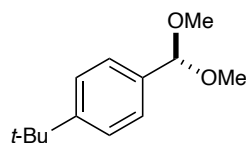

1-(*tert*-butyl)-4-(dimethoxymethyl)benzene **16**: Compound **16** was prepared according to the general procedure **A**, 75% yield as determined by  $^1\text{H}$  NMR spectroscopy using 5,6-dibromo-1,3-benzodioxole as an internal standard.  $^1\text{H}$  NMR (500 MHz,  $\text{CDCl}_3$ )  $\delta$  7.44 – 7.32 (m, 4H), 5.36 (s, 1H), 3.33 (s, 6H), 1.32 (s, 9H).  $^{13}\text{C}$  NMR (125 MHz,  $\text{CDCl}_3$ )  $\delta$  151.54, 135.25, 126.47, 125.25, 103.52, 52.97, 34.72, 31.47.

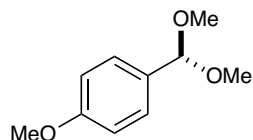

1-(dimethoxymethyl)-4-methoxybenzene **17**: Compound **17** was prepared according to the general procedure **A**, 56% yield as determined by  $^1\text{H}$  NMR spectroscopy using 5,6-dibromo-1,3-benzodioxole as an internal standard.  $^1\text{H}$  NMR (500 MHz,  $\text{CDCl}_3$ )  $\delta$  7.37 (d,  $J = 8.3$  Hz, 2H), 6.89 (d,  $J = 8.3$  Hz, 2H), 5.35 (s, 1H), 3.81 (s, 3H), 3.31 (s, 6H).  $^{13}\text{C}$  NMR (125 MHz,  $\text{CDCl}_3$ )  $\delta$  159.79, 130.49, 128.04, 113.65, 103.18, 55.37, 52.72. HRMS (ESI)  $m/z$  [ $M + H$ ] calcd for  $\text{C}_{10}\text{H}_{15}\text{O}_3$ , 182.0943 found 182.0948.

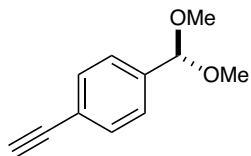

1-(dimethoxymethyl)-4-ethynylbenzene **18**: Compound **18** was prepared according to modified general procedure **A**, using 20 mol% **3**, 370 nm LEDs, 0.33 M MeOH:dioxane (2:1), to give 78% yield as determined by  $^1\text{H}$  NMR spectroscopy using 5,6-dibromo-1,3-benzodioxole as an internal standard.  $^1\text{H}$  NMR (500 MHz,  $\text{CDCl}_3$ )  $\delta$  7.50 (d,  $J = 7.9$  Hz, 2H), 7.41 (d,  $J = 7.9$  Hz, 2H), 5.39 (s, 1H), 3.32 (s, 6H), 3.08 (s, 1H).  $^{13}\text{C}$  NMR (125 MHz,  $\text{CDCl}_3$ )  $\delta$  138.87, 132.14, 126.87, 122.31, 102.61, 83.56, 77.59, 52.75. HRMS (ESI)  $m/z$  [ $M + H$ ] calcd for  $\text{C}_{11}\text{H}_{13}\text{O}_2$ , 176.0837 found 176.0835.

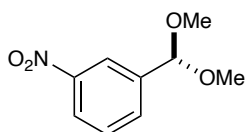

1-(dimethoxymethyl)-3-nitrobenzene **19**: Compound **19** was prepared according to the general procedure **A**, 72% yield as determined by  $^1\text{H}$  NMR spectroscopy using 5,6-dibromo-1,3-benzodioxole as an internal standard.  $^1\text{H}$  NMR (500 MHz,  $\text{CDCl}_3$ )  $\delta$  8.35 (s, 1H), 8.22 – 8.16 (m, 1H), 7.80 (d,  $J = 7.7$  Hz, 1H), 7.56 (t,  $J = 7.8$  Hz, 1H), 5.48 (s, 1H), 3.35 (s, 6H).  $^{13}\text{C}$  NMR (125 MHz,  $\text{CDCl}_3$ )  $\delta$  148.32, 140.40, 132.91, 129.26, 123.44, 122.07, 101.44, 52.72. HRMS (ESI)  $m/z$  [ $M + H$ ] calcd for  $\text{C}_9\text{H}_{12}\text{NO}_4$ , 197.0688 found 197.0691.

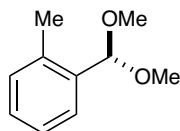

1-(dimethoxymethyl)-2-methylbenzene **20**: Compound **20** was prepared according to the general procedure **A**, 50% yield as determined by  $^1\text{H}$  NMR spectroscopy using 5,6-dibromo-1,3-benzodioxole as an internal standard.  $^1\text{H}$  NMR (500 MHz,  $\text{CDCl}_3$ )  $\delta$  7.53 (d,  $J = 6.2$  Hz, 1H), 7.31 – 7.10 (m, 3H), 5.46 (s, 1H), 3.32 (s, 6H), 2.37 (s, 3H).  $^{13}\text{C}$  NMR (125 MHz,  $\text{CDCl}_3$ )  $\delta$  136.39, 135.77, 130.66, 128.51, 126.65, 125.56, 101.89, 53.16, 19.02.

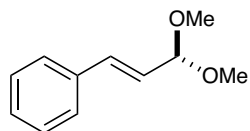

(*E*)-(3,3-dimethoxyprop-1-en-1-yl)benzene **21**: Compound **21** was prepared according to the general procedure **A** to give 72% yield as a 91:9 mixture of *E*:*Z* isomers as determined by  $^1\text{H}$  NMR spectroscopy using 5,6-dibromo-1,3-benzodioxole as an internal standard, and purified by column chromatography (98% hexanes/2% triethylamine) to give a 70:30 mixture of *E*:*Z* isomers, the isolated yield was not determined. Peaks corresponding to the *E*-isomer are as follows:  $^1\text{H}$  NMR (500 MHz,  $\text{CDCl}_3$ )  $\delta$  7.46 – 7.23 (m, 5H), 6.73 (d,  $J$  = 15.8 Hz, 1H), 6.16 (dd,  $J$  = 16.3, 4.7 Hz, 2H), 4.96 (d,  $J$  = 4.8 Hz, 1H), 3.38 (s, 1H).  $^{13}\text{C}$  NMR (125 MHz,  $\text{CDCl}_3$ )  $\delta$  136.23, 133.73, 128.73, 128.25, 126.87, 125.83, 103.06, 52.87. Peaks corresponding to the *Z*-isomer are as follows:  $^1\text{H}$  NMR (500 MHz,  $\text{CDCl}_3$ )  $\delta$  5.76 (dd,  $J$  = 11.9, 7.4 Hz, 1H), 5.11 (d,  $J$  = 7.3 Hz, 1H), 3.36 (s, 6H).  $^{13}\text{C}$  NMR (125 MHz,  $\text{CDCl}_3$ )  $\delta$  99.66, 52.42.

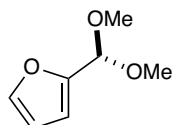

2-(dimethoxymethyl)furan **22**: Compound **22** was prepared according to modified general procedure **A**, using 20 mol% **3**, 370 nm LEDs, 0.33 M MeOH:dioxane (2:1), to give 64% yield as determined by  $^1\text{H}$  NMR spectroscopy using 5,6-dibromo-1,3-benzodioxole as an internal standard.  $^1\text{H}$  NMR (500 MHz,  $\text{CDCl}_3$ )  $\delta$  7.44 – 7.37 (m, 1H), 7.29 – 7.24 (m, 1H), 6.44 – 6.41 (m, 1H), 6.39 – 6.35 (m, 1H), 5.44 (s, 1H), 3.36 (s, 6H).  $^{13}\text{C}$  NMR (125 MHz,  $\text{CDCl}_3$ )  $\delta$  150.99, 142.64, 110.20, 108.58, 98.10, 52.99.

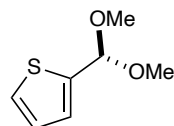

2-(dimethoxymethyl)thiophene **23**: Compound **23** was prepared according to modified general procedure **A**, using 20 mol% **3**, 370 nm LEDs, 0.33 M MeOH:dioxane (2:1), to give 92% yield as determined by  $^1\text{H}$  NMR spectroscopy using 5,6-dibromo-1,3-benzodioxole as an internal standard.  $^1\text{H}$  NMR (500 MHz,  $\text{CDCl}_3$ )  $\delta$  7.29 (d,  $J$  = 5.1 Hz, 1H), 7.07 (dd,  $J$  = 2.8, 1.7 Hz, 1H), 7.00 (dd,  $J$  = 5.0, 3.5 Hz, 1H), 5.64 (s, 1H), 3.36 (s, 6H).  $^{13}\text{C}$  NMR (125 MHz,  $\text{CDCl}_3$ )  $\delta$  141.61, 126.76, 125.78, 125.52, 100.18, 52.64. HRMS (ESI)  $m/z$  [ $M + H$ ] calcd for  $\text{C}_7\text{H}_{11}\text{O}_2\text{S}$ , 159.0474 found 159.0475.

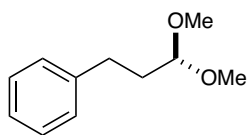

(3,3-dimethoxypropyl)benzene **24**: Compound **24** was prepared according to modified general procedure **A**, using 20 mol% **3**, to give 62% yield as determined by  $^1\text{H}$  NMR spectroscopy using 5,6-dibromo-1,3-benzodioxole as an internal standard.  $^1\text{H}$  NMR (500 MHz,  $\text{CDCl}_3$ )  $\delta$  7.37 – 7.09 (m, 5H), 4.37 (t, 1H), 3.33 (s, 6H), 2.68 (t,  $J = 8.0$  Hz, 2H), 1.97 – 1.89 (m, 2H).  $^{13}\text{C}$  NMR (125 MHz,  $\text{CDCl}_3$ )  $\delta$  141.77, 128.74, 128.54, 126.02, 103.90, 52.87, 34.23, 31.01. HRMS (ESI)  $m/z$  [ $\text{M} + \text{H}$ ] calcd for  $\text{C}_{11}\text{H}_{17}\text{O}_2$ , 181.1229 found 181.1184

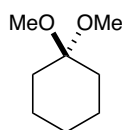

1,1-dimethoxycyclohexane **25**: Compound **25** was prepared according to the general procedure **A**, 75% yield as determined by  $^1\text{H}$  NMR spectroscopy using 5,6-dibromo-1,3-benzodioxole as an internal standard.  $^1\text{H}$  NMR (500 MHz,  $\text{CDCl}_3$ )  $\delta$  3.17 (s, 6H), 1.91 – 1.30 (m, 11H).  $^{13}\text{C}$  NMR (125 MHz,  $\text{CDCl}_3$ )  $\delta$  100.09, 47.43, 32.81, 25.72, 22.95. HRMS (ESI)  $m/z$  [ $\text{M} + \text{H}$ ] calcd for  $\text{C}_8\text{H}_{17}\text{O}_2$ , 145.1229 found 145.1184.

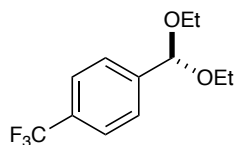

1-(diethoxymethyl)-4-(trifluoromethyl)benzene **26**: Compound **26** was prepared according to modified general procedure **A** using 20 mol% **3** and purified according to procedure **B** to give a pale-yellow oil, 0.079g, 64% yield.  $^1\text{H}$  NMR (500 MHz,  $\text{CDCl}_3$ )  $\delta$  7.67 – 7.58 (m, 4H), 5.57 (s, 1H), 3.69 – 3.48 (m, 4H), 1.33 – 1.18 (m, 6H).  $^{13}\text{C}$  NMR (125 MHz,  $\text{CDCl}_3$ )  $\delta$  143.17, 130.58 (q,  $J_{\text{FC}} = 32.2$  Hz), 127.23, 125.26 (q,  $J_{\text{FCC}} = 3.8$  Hz), 124.29 (q,  $J_{\text{FC}} = 272.0$  Hz,  $\text{CF}_3$ ), 100.78, 61.28, 15.23.

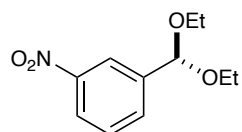

1-(diethoxymethyl)-3-nitrobenzene **27**: Compound **27** was prepared according to modified general procedure **A** using 20 mol% **3**, to give 70% yield as determined by  $^1\text{H}$  NMR spectroscopy using 5,6-dibromo-1,3-benzodioxole as an internal standard.  $^1\text{H}$  NMR (500 MHz,  $\text{CDCl}_3$ )  $\delta$  8.40 – 8.31 (m, 1H), 8.19 (d,  $J = 8.3$  Hz, 1H), 7.82 (d,  $J = 7.7$  Hz, 1H), 7.58 – 7.52 (m, 1H), 5.59 (s, 1H), 3.70 – 3.48 (m, 4H), 1.27 (s, 6H).  $^{13}\text{C}$  NMR (125 MHz,  $\text{CDCl}_3$ )  $\delta$  148.41, 141.53, 133.00, 129.33, 123.42, 122.09, 100.14, 61.41, 15.27.

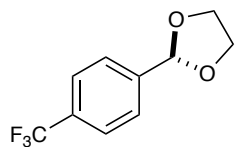

2-(4-(trifluoromethyl)phenyl)-1,3-dioxolane **28**: Compound **28** was prepared according to modified general procedure **A** using 20 mol% **3**, 62% yield as determined by  $^1\text{H}$  NMR spectroscopy using 5,6-dibromo-1,3-benzodioxole as an internal standard.  $^1\text{H}$  NMR (500 MHz,  $\text{CDCl}_3$ )  $\delta$  7.65 (d,  $J = 8.3$  Hz, 2H), 7.60 (d,  $J = 8.0$  Hz, 2H), 5.86 (s, 1H), 4.16 – 4.01 (m, 4H).  $^{13}\text{C}$  NMR (125 MHz,  $\text{CDCl}_3$ )  $\delta$  142.05, 131.36 (q,  $J_{\text{FCC}} = 32.2$  Hz), 125.47 (q,  $J_{\text{FCC}} = 3.8$  Hz), 124.16 (q,  $J_{\text{CF}} = 272.3$  Hz,  $\text{CF}_3$ ), 126.96, 102.90, 65.52.

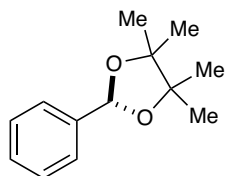

4,4,5,5-tetramethyl-2-phenyl-1,3-dioxolane **29**: Compound **29** was prepared according to modified general procedure **A**, using 20 mol% **3** and 0.33 M MeOH:dioxane (2:1). Compound **29** was purified according to procedure **B** to give a pale-yellow oil, 0.069g, 67% yield.  $^1\text{H}$  NMR (500 MHz,  $\text{CDCl}_3$ )  $\delta$  7.49 (d,  $J = 7.4$  Hz, 2H), 7.38 – 7.27 (m, 3H), 5.98 (s, 1H), 1.32 (s, 6H), 1.27 (s, 6H).  $^{13}\text{C}$  NMR (125 MHz)  $\delta$  139.76, 128.70, 128.34, 126.36, 100.00, 82.73, 24.43, 22.29.

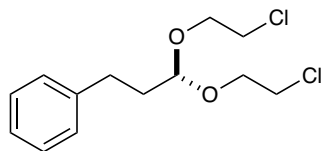

(3,3-bis(2-chloroethoxy)propyl)benzene **30**: Compound **30** was prepared according to the general procedure **A**, 53% yield as determined by  $^1\text{H}$  NMR spectroscopy using 5,6-dibromo-1,3-benzodioxole as an internal standard.  $^1\text{H}$  NMR (500 MHz,  $\text{CDCl}_3$ )  $\delta$  7.32 – 7.26 (m, 2H), 7.22 – 7.16 (m, 3H), 4.63 (t,  $J = 5.9$  Hz, 1H), 3.86 (dt,  $J = 11.0, 5.6$  Hz, 2H), 3.75 (dt,  $J = 11.0, 5.7$  Hz, 2H), 3.65 (t,  $J = 5.6$  Hz, 4H), 2.75 – 2.69 (m, 2H), 2.03 – 1.95 (m, 2H).  $^{13}\text{C}$  NMR (125 MHz,  $\text{CDCl}_3$ )  $\delta$  141.28, 128.54, 128.51, 126.11, 102.47, 65.44, 43.41, 34.55, 30.93.

## V. Photosensitizer procedure and mechanistic studies:

### General procedure for sensitizer reaction:

To an 8 mL vial fitted with a magnetic stir bar was added **F<sub>2</sub>Irpc** {bis[2-(4,6-difluorophenyl)pyridinato-C2,N](picolinate)iridium(III)} (0.005g, 0.0065 mmol, 0.025 equiv.), 2-naphthol (0.018g, 0.125 mmol, 0.5 equiv.), and methanol (1 mL). Next, the carbonyl compound was added (0.25 mmol, 1.0 equiv.). The reaction mixture was then sparged for 5 min, sealed, and placed 4.0 cm from a 40 W Blue LED light (Kessil Tuna Blue) for 18 h. Cooling fans were used to maintain room temperature. To the reaction was then added 5,6-dibromo-1,2-benzodioxole (0.5. mmol) and 250  $\mu$ L of dioxane. An aliquot was then taken up, dissolved in CDCl<sub>3</sub>, and analyzed by <sup>1</sup>H NMR.

### Photosensitizer mechanistic studies:

Emission quenching studies showed that **F<sub>2</sub>Irpc** emission was 34% quenched in the presence of 2-naphthol (**5**) with and without benzaldehyde (**6**) and 4-trifluoromethyl benzaldehyde (**S5**), suggesting efficient energy transfer between **F<sub>2</sub>Irpc** and **5** (Figure S2). No **F<sub>2</sub>Irpc** emission quenching was observed in the presence of **6** and **S5** in the absence of **5**.

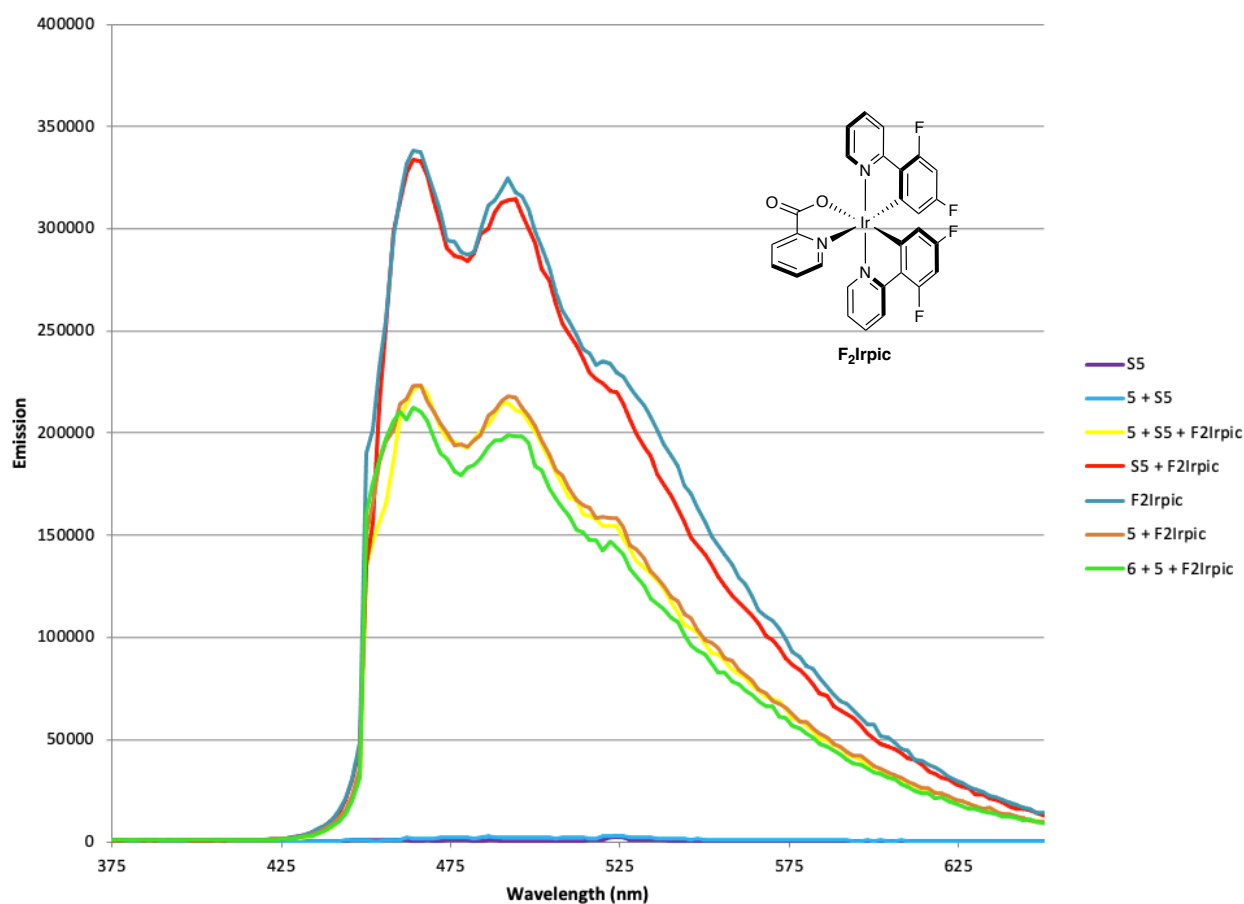

**Figure S2:** Emission spectra of **F<sub>2</sub>Irpc** [bis(4,6-difluorophenyl-pyridine)(picolinate) iridium(III)] (0.8 mM in methanol) with and without 25 equivalents of the corresponding aldehydes (**6** or **S5**) and/or 2-naphthol (**5**) [Excitation wavelength: 454 nm].

Emission quenching studies showed that **S1** emission was 80% quenched in the presence of 2-naphthol (**5**) with and without 4-trifluoromethyl benzaldehyde (**S5**) (Figure S3). No **S1** emission quenching was observed in the presence of **S5** in the absence of **5**.

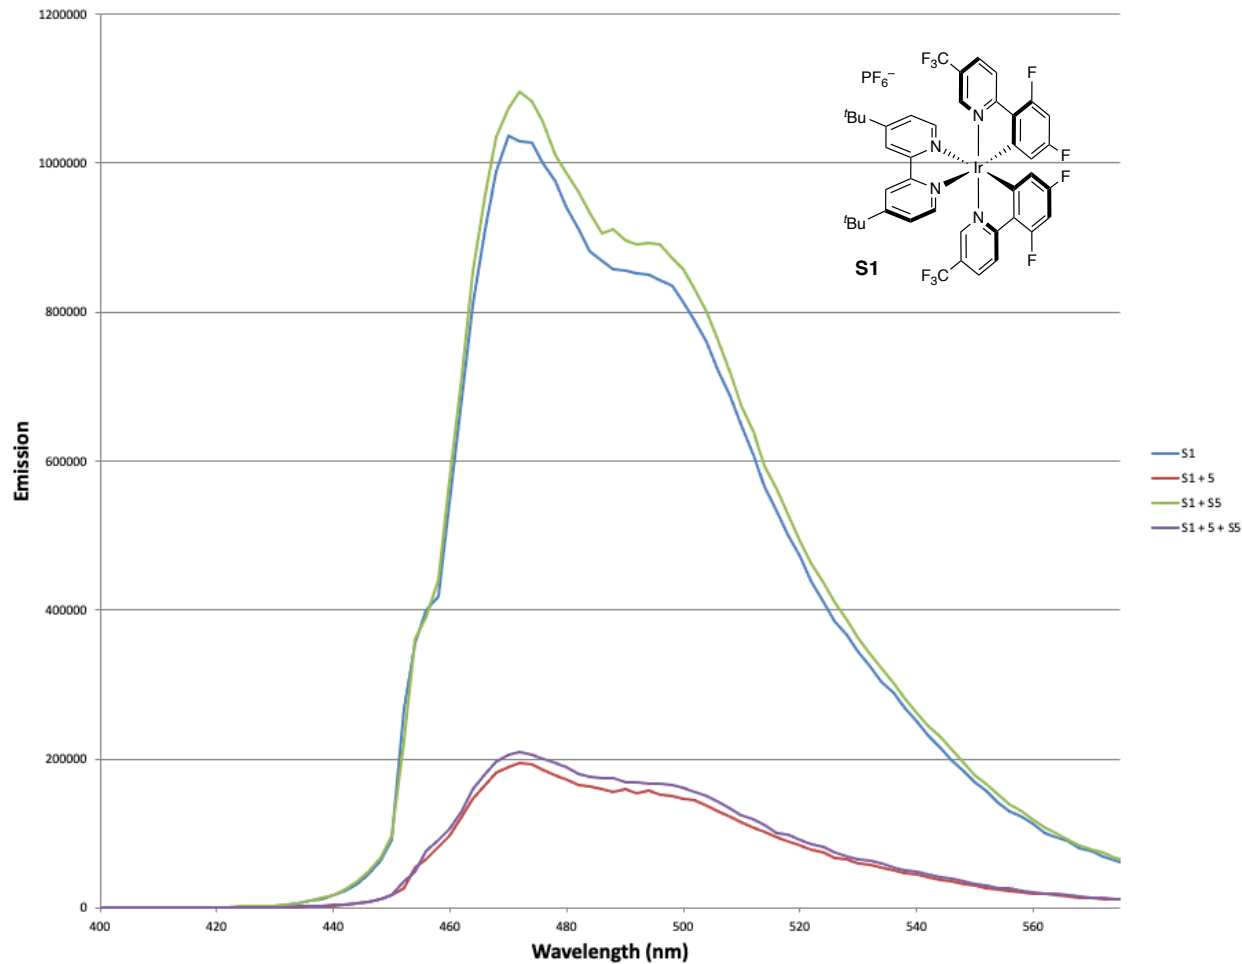

**Figure S3:** Emission spectra of [Ir{dF(CF<sub>3</sub>)ppy}2(dtbbpy)]PF<sub>6</sub> (**S1**) [0.8 mM in methanol] with and without 25 equivalents of the corresponding aldehyde (**S5**) and/or 2-naphthol (**5**) [Excitation wavelength: 454 nm].

Emission quenching studies showed that the emission of ruthenium complex **S2** was not quenched by either aldehyde **S5** or 2-naphthol (**5**) [Figure S4].

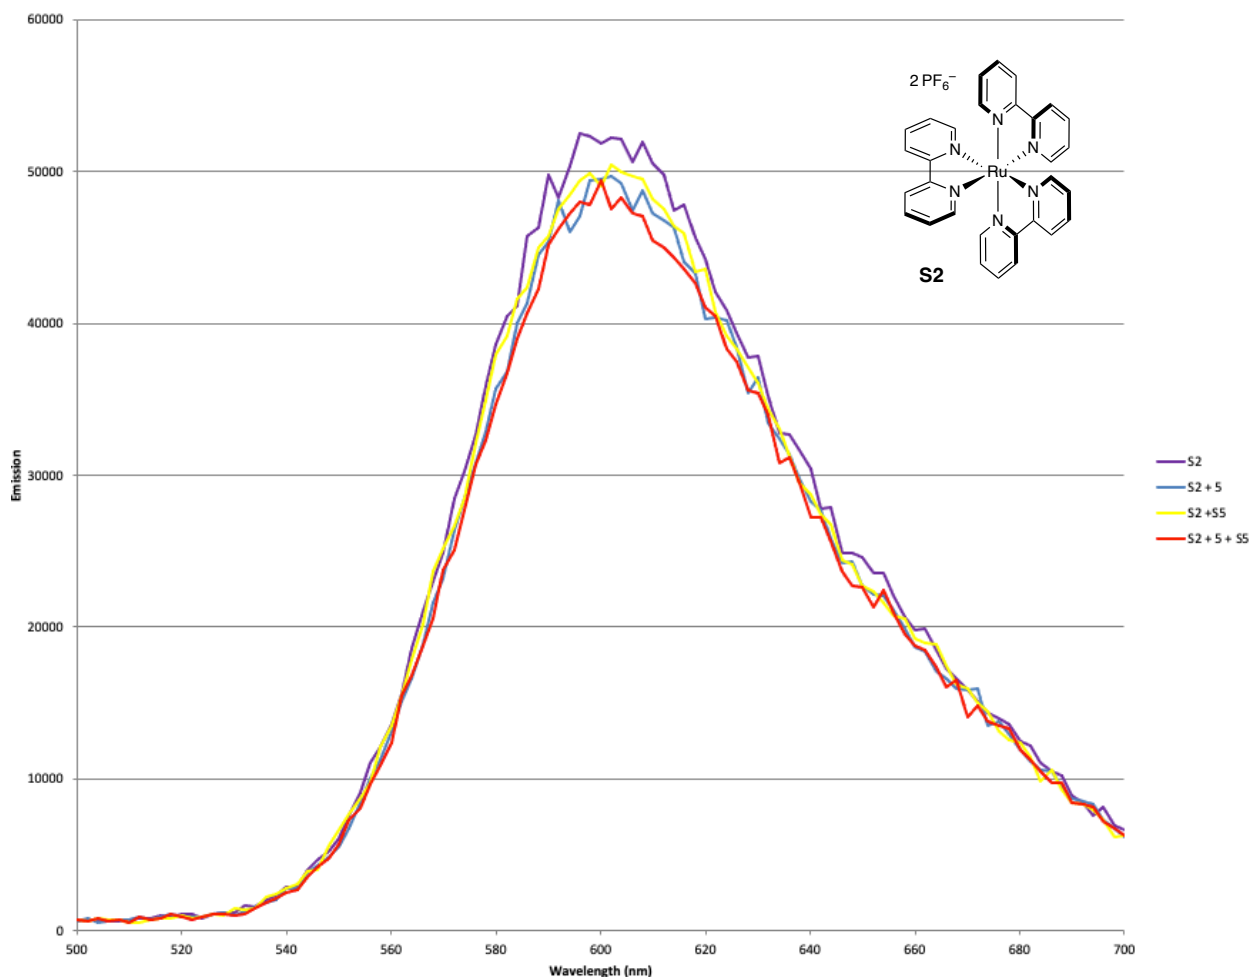

**Figure S4:** Emission spectra of **S2** [Ru(bby)<sub>3</sub>(PF<sub>6</sub>)<sub>2</sub>], {0.8 mM in methanol} with and without 25 equivalents of the aldehyde **S5** and/or 2-naphthol (**5**) [Excitation wavelength: 450 nm].

A possible mechanism for the formation of **13** is shown in Scheme S4. Photoexcitation of **F<sub>2</sub>Irpc** results in formation of singlet <sup>1</sup>**F<sub>2</sub>Irpc**<sup>\*</sup>, intersystem crossing (ISC), and metal to ligand charge transfer (MLCT) gives rise to triplet excited state <sup>3</sup>**F<sub>2</sub>Irpc**<sup>\*</sup>. Triplet energy transfer (TET) from <sup>3</sup>**F<sub>2</sub>Irpc**<sup>\*</sup> to **5**, gives rise to **5**<sup>\*</sup> which is sufficiently acidic to protonate aldehyde **S5** to afford oxonium **S6**. Subsequent reaction of **S6** or hydrogen bonding complex **S6**<sup>\*</sup> with 2 equivalents of methanol results in formation of acetal product **13** and regenerates a proton. The resulting in situ generated proton can either protonate an additional equivalent of aldehyde or protonate **S7** to reconstitute **5**. The addition of 5 mol% sodium bicarbonate shut down acetal formation in the presence of **F<sub>2</sub>Irpc** with and without **5**, suggesting that the reaction involves generation of a Brønsted acid. Notably, unlike in the case of 6-bromo-2-naphthol (**3**), overnight irradiation of **F<sub>2</sub>Irpc** and **5**, followed by the addition of **S5** and placement in the dark resulted in no product formation. There does not appear to be generation of a persistent in situ generated acidic species (vide infra). The reaction is completely shut down if left open to air with **F<sub>2</sub>Irpc** with and without **5**. It is also worth noting that the use of 1 equiv. of **5** does not provided and increase in reaction efficiency.



| 5 | F <sub>2</sub> Irpc | 5 mol% NaHCO <sub>3</sub> | yield |
|---|---------------------|---------------------------|-------|
| × | ×                   | —                         | 0     |
| ✓ | ×                   | —                         | 0     |
| × | ✓                   | —                         | 25    |
| ✓ | ✓                   | —                         | 74    |
| × | ✓                   | ✓                         | 0     |
| ✓ | ✓                   | ✓                         | 0     |

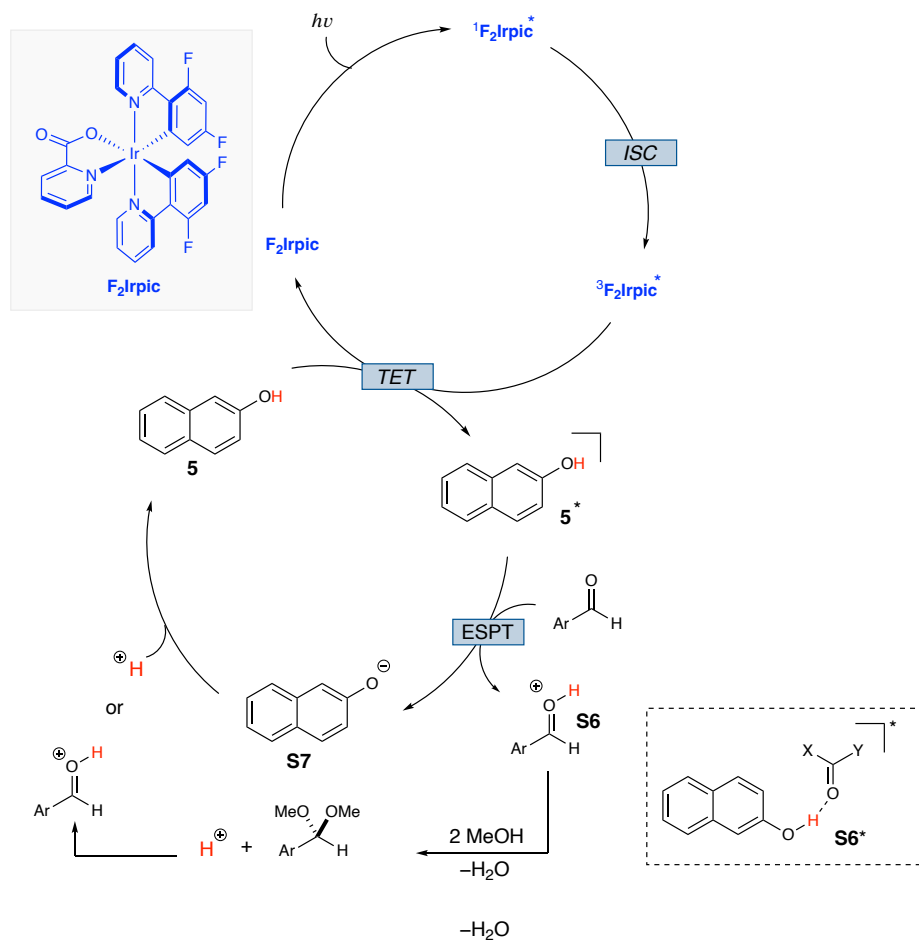

**Scheme S4:** Potential mechanism for triplet energy transfer and photoactivation of naphthol. Run according to the general procedure for sensitizer reactions: (0.5 mmol) aldehyde in methanol (0.5 M), under argon atmosphere, % yields based on <sup>1</sup>H NMR using an internal standard: 5,6-dibromo-1,3-benzodioxole.

When iridium photocatalyst **S1** in combination with **5** is used, 40% yield of **13** is obtained in (Scheme S5). No product is observed with **S1** in the absence of **5**.

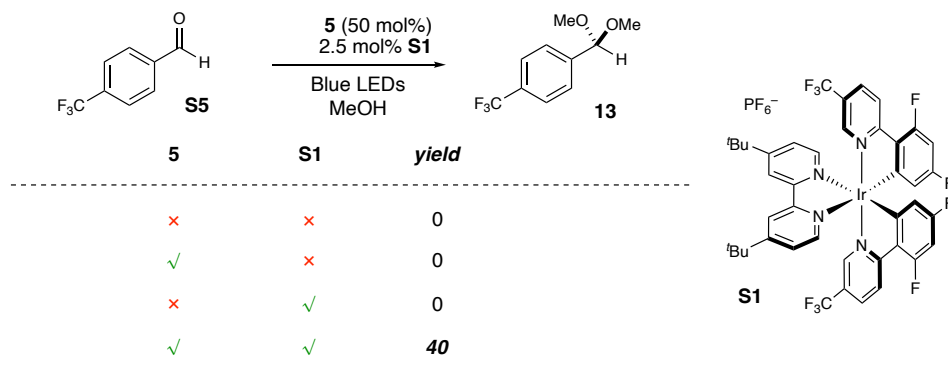

**Scheme S5:** Run according to the general procedure for sensitizer reactions: (0.5 mmol) aldehyde in methanol (0.5 M), under argon atmosphere, % yields based on <sup>1</sup>H NMR using an internal standard: 5,6-dibromo-1,3-benzodioxole.

With iridium photocatalyst **S2**, >90% yield of **13** is observed with and without 2-naphthol **5**. This suggests that a different mechanism may be operable (Scheme S6). Notably, the addition of 5 mol% NaHCO<sub>3</sub> shuts down the reaction with **S2** and with (**S2** + **5**), suggesting that in both cases there is photogeneration of a Brønsted acidic species.

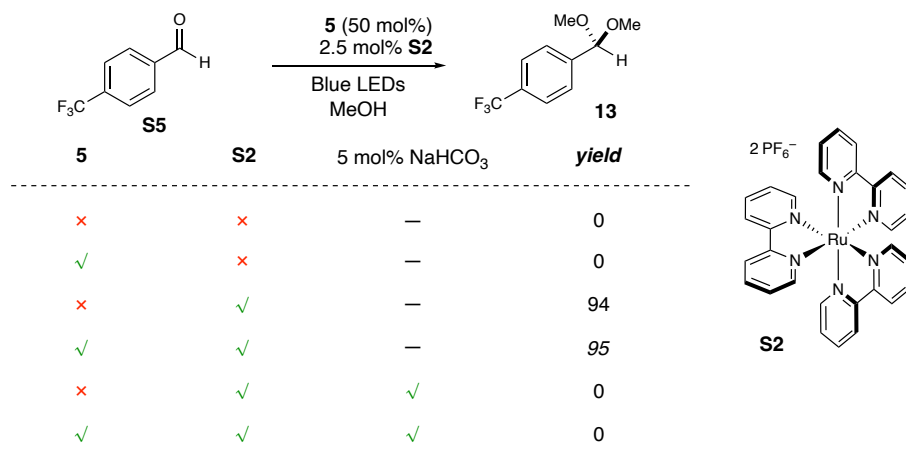

**Scheme S6:** Run according to the general procedure for sensitizer reactions: (0.5 mmol) aldehyde in methanol (0.5 M), under argon atmosphere, % yields based on <sup>1</sup>H NMR using an internal standard: 5,6-dibromo-1,3-benzodioxole.

It was observed that electron-withdrawing groups are required for the sensitization reaction to proceed. When benzaldehyde (**6**) was investigated only 6% product **7** was observed in the presence of **F<sub>2</sub>Irpcic**, with and without **5** (Scheme S7). For the reaction of electron-rich *p*-tolualdehyde (**S8**) in the presence of **F<sub>2</sub>Irpcic**, with or without **5**, 57 and 54% yield of **12** was observed, respectively (Scheme S8).

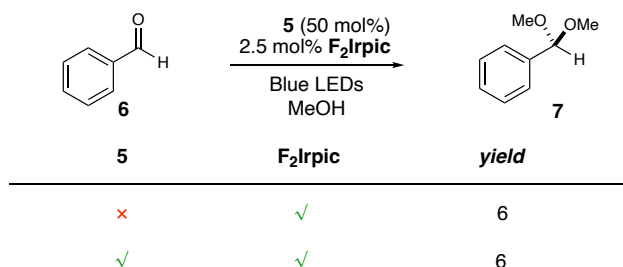

**Scheme S7:** Photosensitizer and 2-naphthol with benzaldehyde. Run according to the general procedure for sensitizer reactions: (0.5 mmol) aldehyde in methanol (0.5 M), under argon atmosphere, % yields based on <sup>1</sup>H NMR using an internal standard: 5,6-dibromo-1,3-benzodioxole.

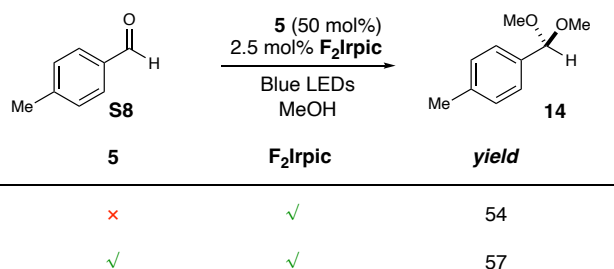

**Scheme S8:** Photosensitizer and 2-naphthol with *p*-tolualdehyde. Run according to the general procedure for sensitizer reactions: (0.5 mmol) aldehyde in methanol (0.5 M), under argon atmosphere, % yields based on <sup>1</sup>H NMR using an internal standard: 5,6-dibromo-1,3-benzodioxole.

#### IV. Initiation kinetics and NMR evidence for photogenerated strong acid:

The standard reaction was monitored under constant irradiation with Blue LEDs (Figure S5). A 2 h induction period was observed, after which the reaction reached 90% conversion after 6 h.

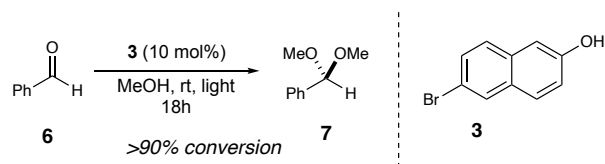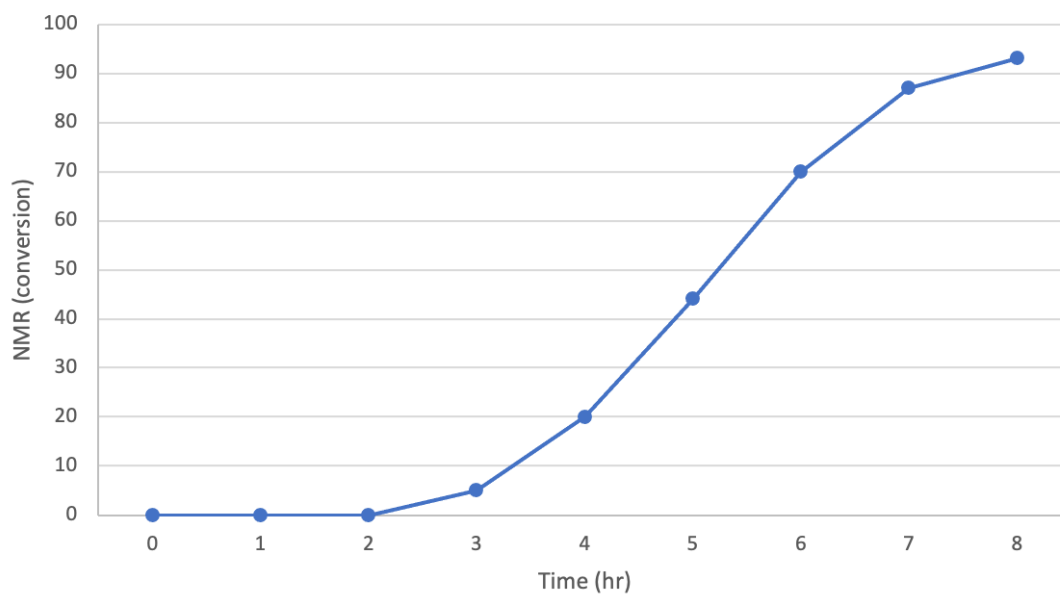

**Figure S5:** Reaction run according to standard procedure A. Aliquots were taken every 1 h using a BD spinal needle and %conversion of **6** to **7** was determined by NMR spectroscopy.

To further probe the initiation kinetics, catalyst **3** in methanol was irradiated with Blue LEDs for 17 h (Figure S6). Next, aldehyde **6** was added and the reaction was placed in the dark. The reaction reached completion in less than 2 h. This suggests that a strongly acidic species is generated and persists in the absence of further irradiation.

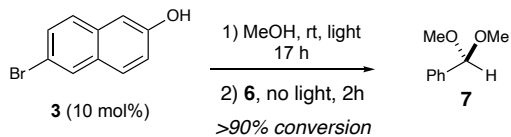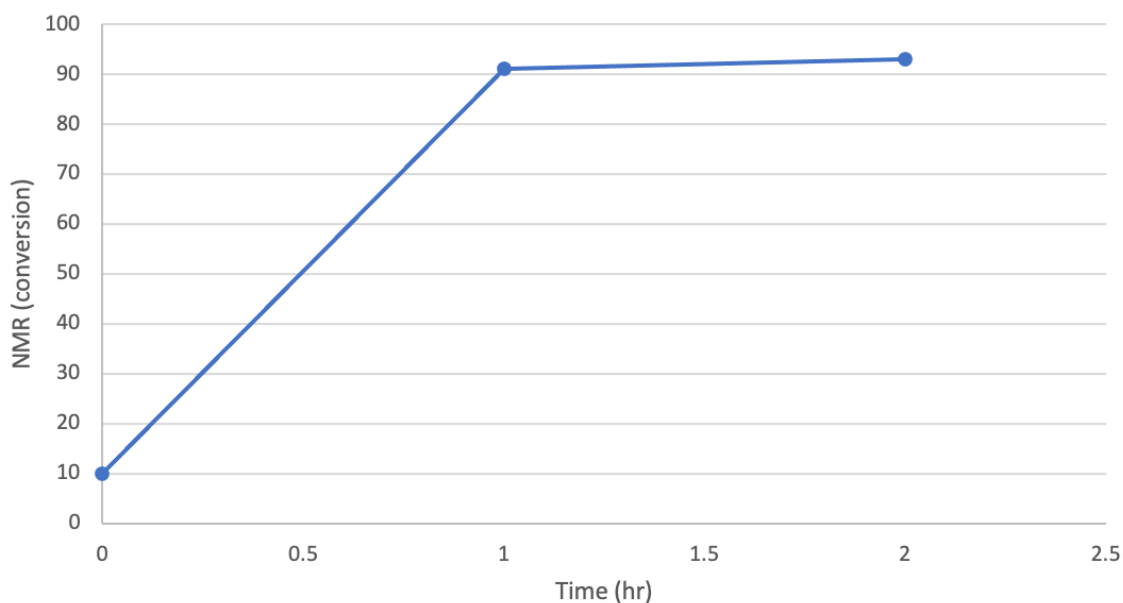

**Figure S6:** Reaction run with 0.05 mmol **3** and 0.5 mmol **6** in methanol (0.5 M) under argon atmosphere. Aliquots were taken using a BD spinal needle and %conversion of **6** to **7** was determined by NMR spectroscopy.

To test the reversibility of strong acid formation, catalyst **3** was irradiated in methanol for 24 h (Figure S7). The reaction was then placed in the dark for 26 h. Next, **6** was added, and the reaction was left to stir in the dark until complete. Despite having stirred in the dark for 26 h, the reaction still finished in less than 2 h, indicating the formation of a persistent strongly acidic species is not reversible.

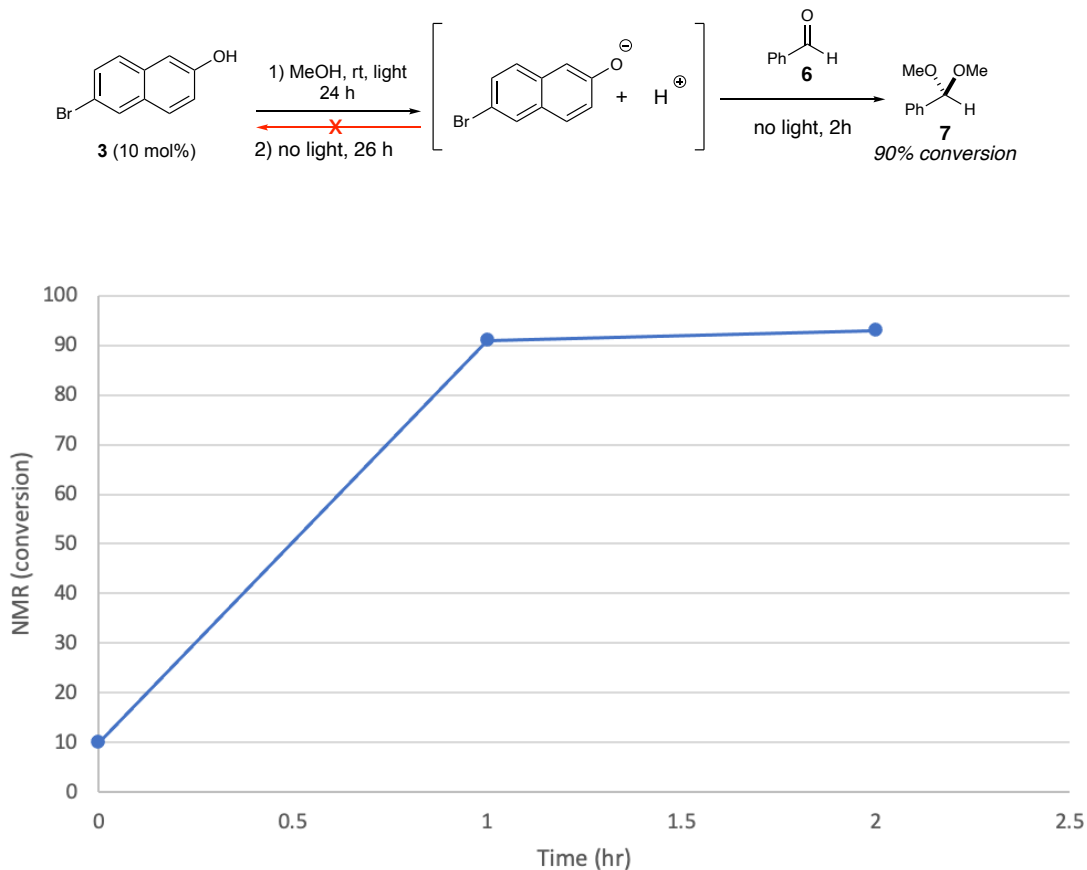

**Figure S7:** Reaction run with 0.05 mmol **3** and 0.5 mmol **6** in methanol (0.5 M) under argon atmosphere. Aliquots were taken using a BD spinal needle and %conversion of **6** to **7** was determined by NMR spectroscopy.

The hydroxyl peak of catalyst **3** in the absence of aldehyde **6** is shown in Figure S8, A. Upon the addition of **6** the OH-peak broadens slightly and shifts downfield from 5.17 ppm to 6.13, suggesting the formation of an H-bonding complex between **3** and **6** (Figure S8, B). After 5 h irradiation with Blue LEDs, the OH-peak of **3** significantly broadens and shifts from 6.13 to 6.20 ppm, suggesting enhanced hydrogen bonding upon irradiation (Figure S8, C). Finally, after 21 h irradiation, the OH-peak further shifts to 6.31 ppm (Figure S8, D). This is evidence that prolonged irradiation results in further generation of a strongly acidic species.

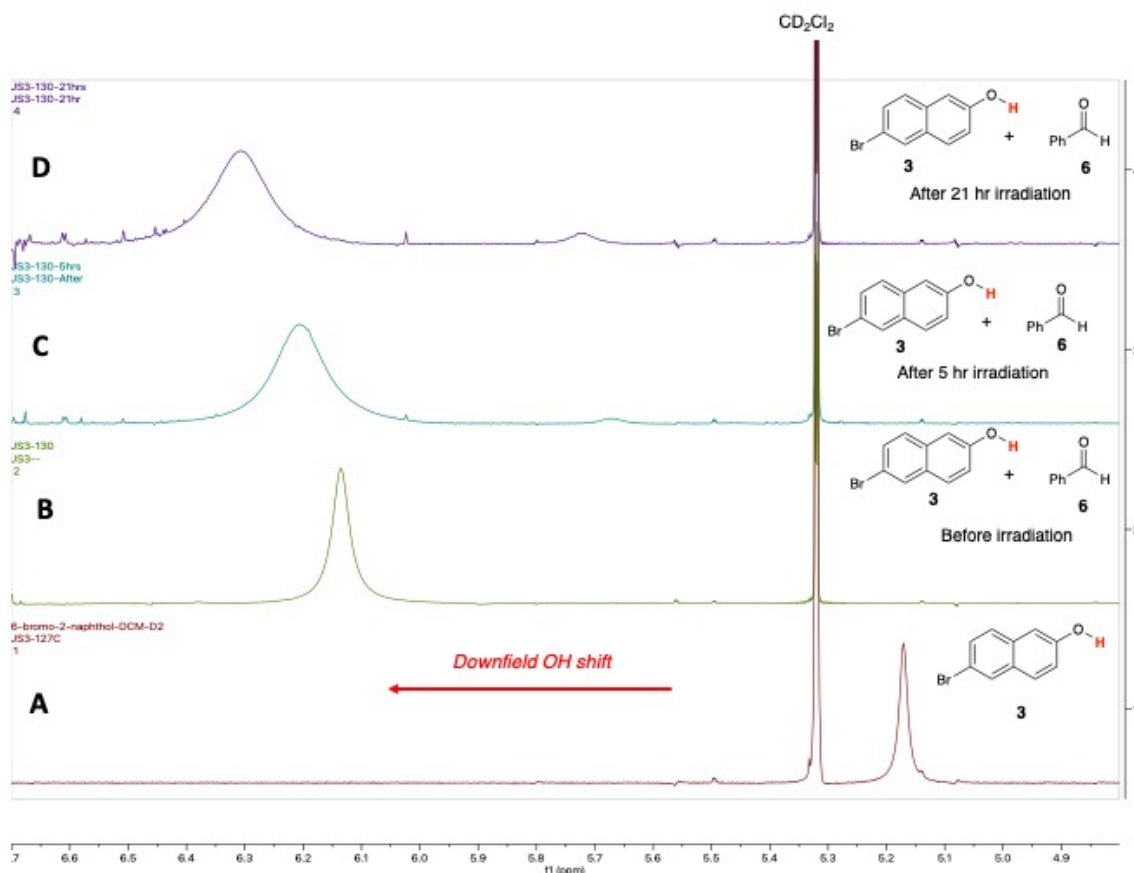

**Figure S8:** <sup>1</sup>H NMR spectra showing the hydroxy chemical shift of **3** compared to a 1:1 mixture of **3** and **6** before and after 5 h and 21 h irradiation with Blue LEDs (0.25 M in CD<sub>2</sub>Cl<sub>2</sub>).

The aromatic region for catalyst **3** and aldehyde **6** is shown in Figure S9, A and B. Up mixing of **3** and **6**, the peaks broaden, suggesting formation of an H-bonding complex (Figure S9, C). Notably, the catalyst peaks at 7.11 ppm shift down field by  $\sim 0.05$  ppm. After 18 h irradiation with Blue LEDs, the aromatic region shows little change (Figure S9, D).

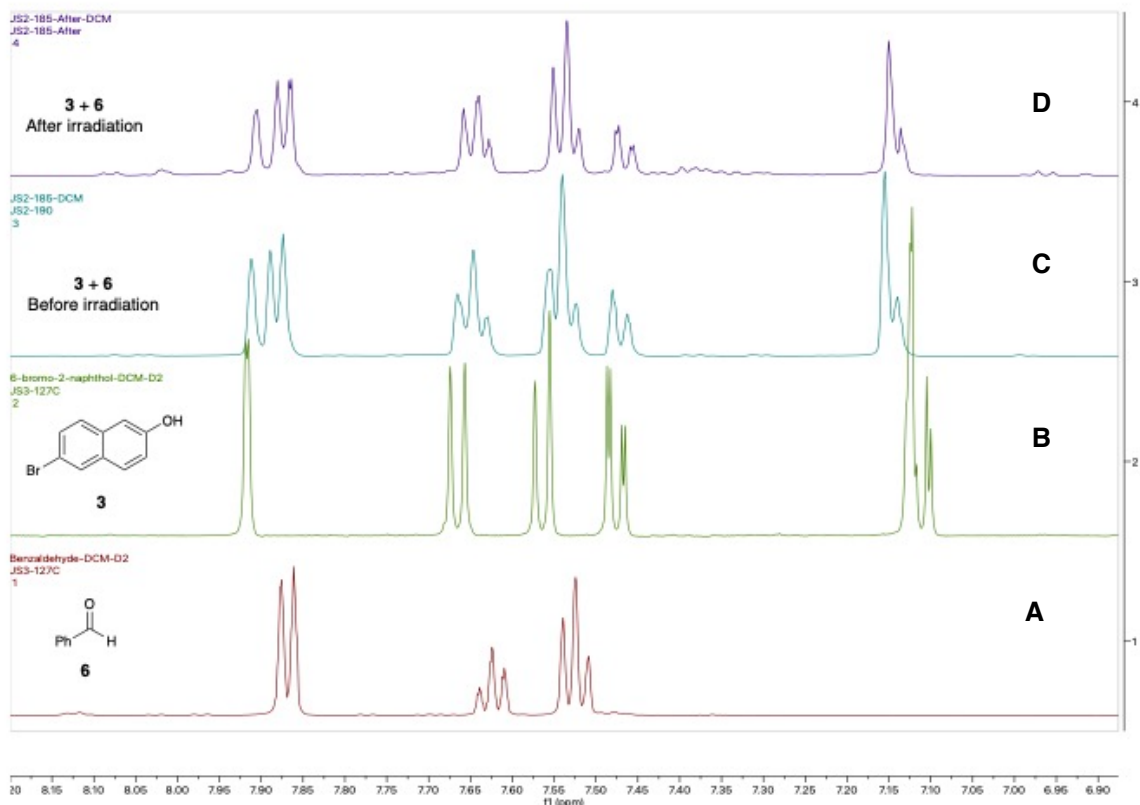

**Figure S9:** NMR spectra showing the aromatic region of **3** and **6** compared to of a 1:1 mixture of **3** and **6** before and after 18 h irradiation with Blue LEDs (0.25 M in  $\text{CD}_2\text{Cl}_2$ ).



## VII. Determination of the excited state pK<sub>a</sub>s and excited state lifetimes for catalysts 3 and 5:<sup>13,14,15</sup>

### 2-naphthol (5):

The following aqueous stock solutions were prepared:

- 1 mg in 50 mL; 2-naphthol (2-Nap) solution
- 0.10 M HCl
- 0.10 M NaOH
- 0.20 M 1:1 NH<sub>3</sub>-NH<sub>4</sub>Cl buffer solution

Afterward, the solutions being analyzed were prepared in the following ratio:

- Acidic Solution: 10 mL of HCl solution, 5 mL of (2-Nap) solution diluted up to 50 mL with DI water
- Basic Solution: 10 mL of NaOH solution, 5 mL of (2-Nap) solution diluted up to 50 mL with DI water
- Buffer Solution: 10 mL of Buffer solution, 5 mL of (2-Nap) solution diluted up to 50 mL with DI water

The pH for those solutions were as follows (measured by Vernier Go Direct™ Electrode Amplifier):

- Acidic: 1.7
- Basic: 12.33
- Buffer: 9.48

---

<sup>13</sup> Marciniak, B.; Kozubek, H.; Paszyc, S. *J. Chem. Ed.* **1992**, *69*, 247.

<sup>14</sup> Park, H.-R.; Mayer, B.; Wolschann, P.; Koehler, G. *J. Phys. Chem.* **1994**, *98*, 6158.

<sup>15</sup> Rosenberg, J. L.; Brinn, I. *J. Phys. Chem.* **1972**, *76*, 3558.

The three solutions were analyzed using UV-Vis (Figure S10) and fluorometer (Figure S11).

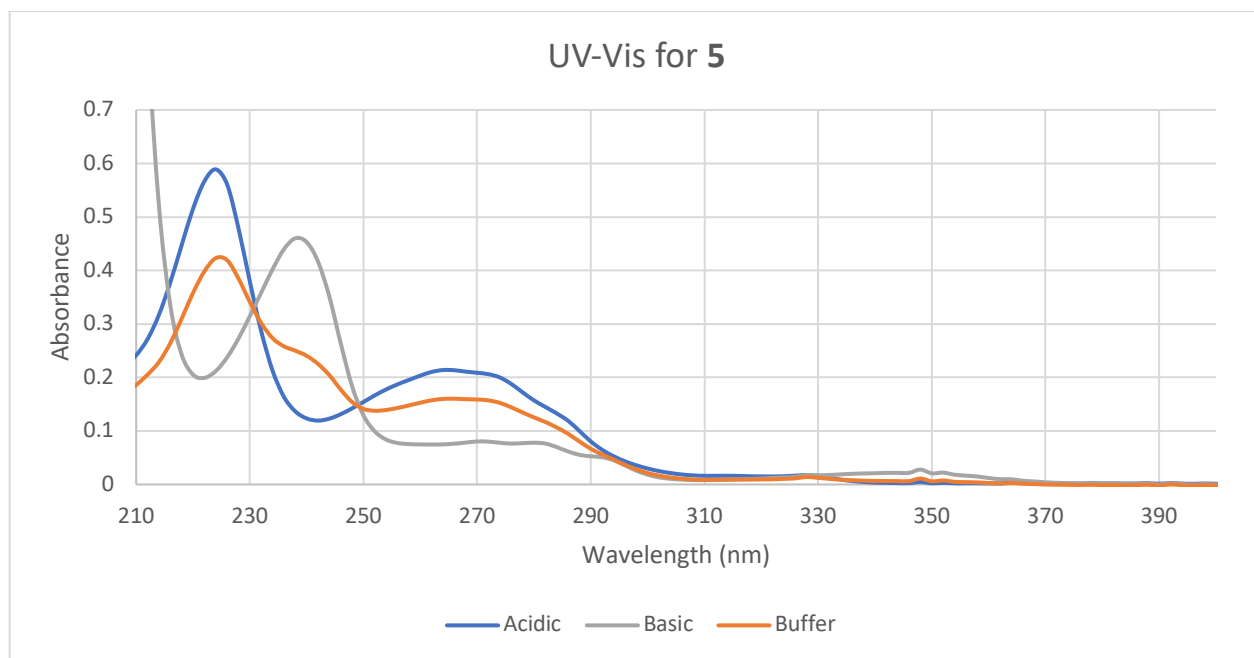

**Figure S10:** UV-Vis for the acidic, basic, and buffer solutions of 5.

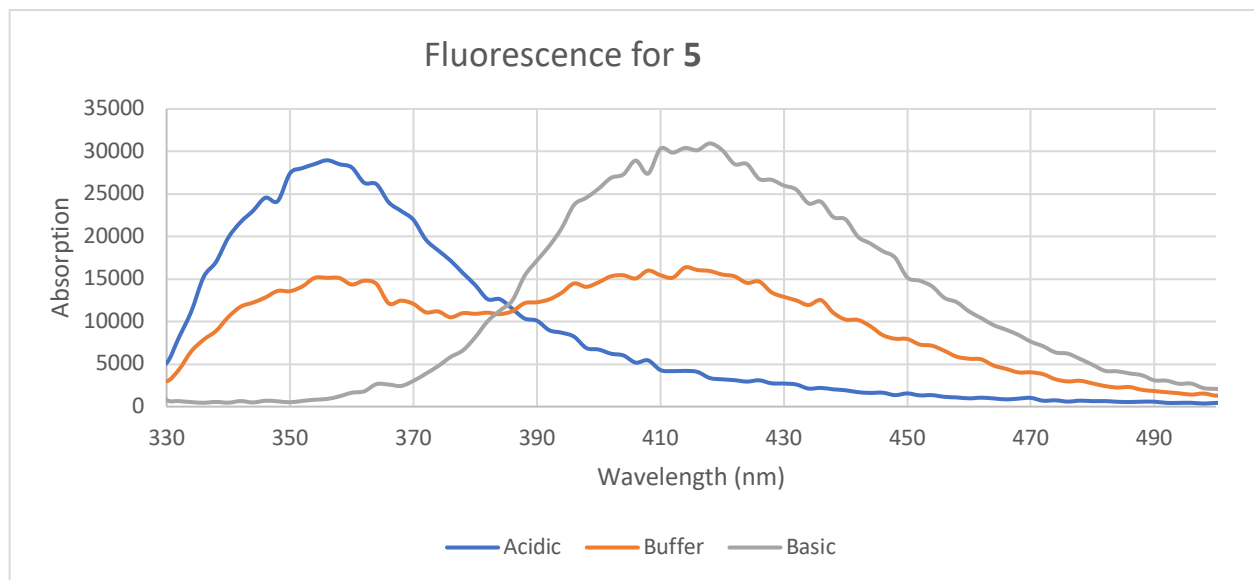

**Figure S11:** Fluorescence spectra for the acidic, basic, and buffer solutions of 5 (Excitation wavelength: 331 nm).

From the acidic and basic solutions, the 0-0 energy was able to be calculated by overlaying the UV-Vis and fluorometer graphs (Figures S12 and S13).

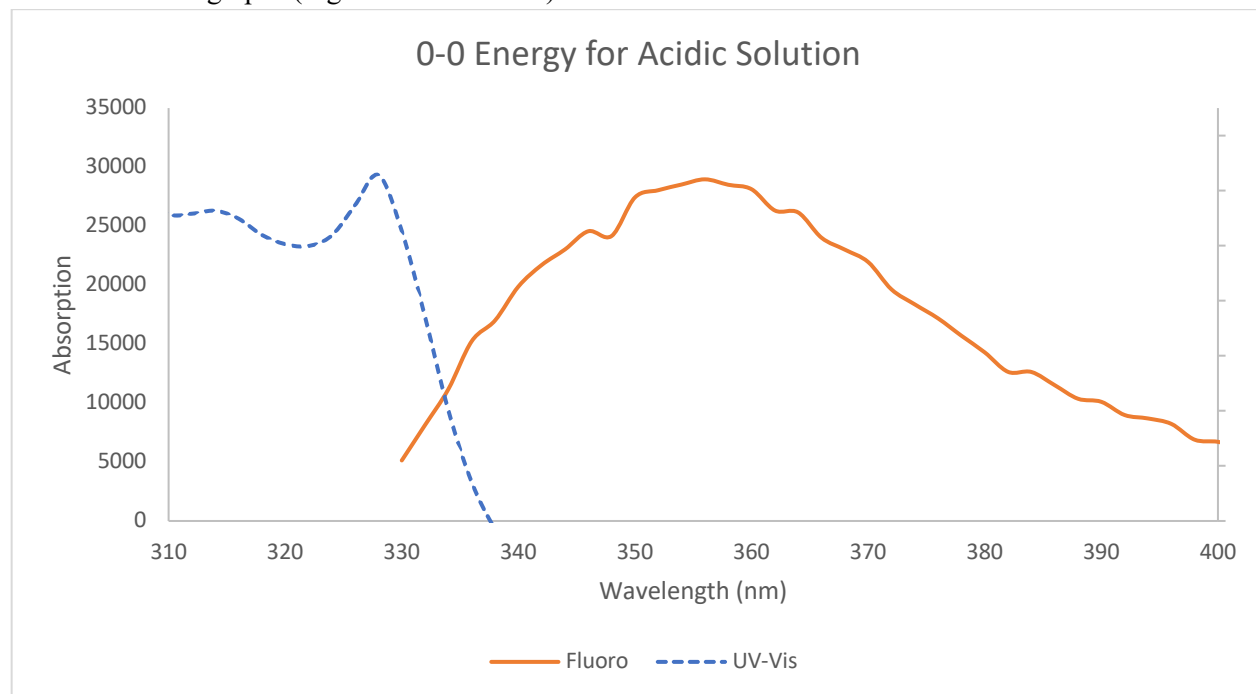

**Figure S12:** Fluorescence and UV-Vis overlay of the acidic solution for **5** (Excitation wavelength: 331 nm).

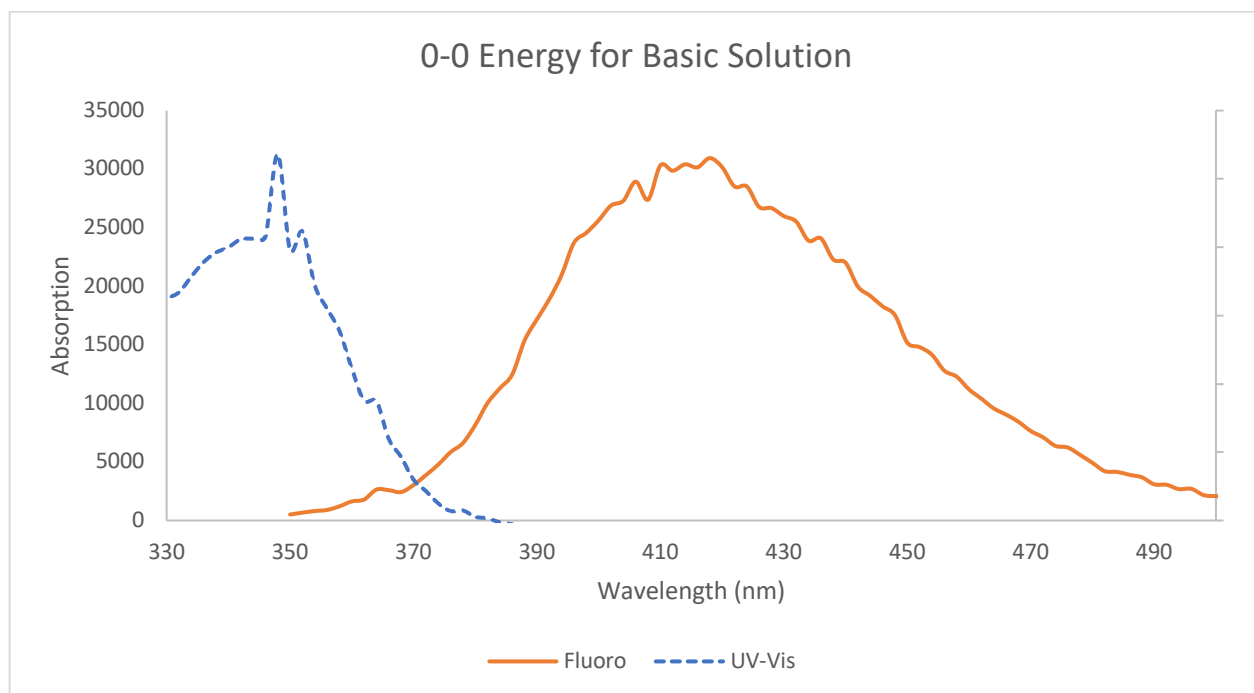

**Figure S13:** Fluorescence and UV-Vis spectra overlay of the basic solution for **5** (Excitation wavelength: 331 nm).

The following calculations were performed to determine pKa and pKa\*:

To begin we must figure out the concentration of the analyte in the three solutions being tested;

$$M_1 V_1 = M_2 V_2$$

$$(1.388 \times 10^{-4} \text{M})(5 \text{ mL}) = M_2 (50 \text{ mL})$$

$$M_2 = 1.388 \times 10^{-5} \text{M} = c_0$$

We must also calculate the molar absorptivity ( $\epsilon$ ) of the acidic and basic forms of 2-naphthol at the wavelength of maximum absorbance for the **conjugate base** form from UV-Vis graphs:

$$A = \epsilon b c_0$$

$$c_0 = 1.388 \times 10^{-5} \text{M}$$

$$b = 1 \text{ cm}$$

$$A_{238(\text{NOH})} = .137$$

$$A_{238(\text{NO}^-)} = .460$$

$$\epsilon_{(\text{NOH})} = \frac{.137}{(1.388 \times 10^{-5})} = 9876.317$$

$$\epsilon_{(\text{NO}^-)} = \frac{.460}{(1.388 \times 10^{-5})} = 33141.21$$

Afterward, we can calculate the concentration of the (NOH) and (NO<sup>-</sup>) in the buffer using the absorbance at the wavelength used previously and the following equations:

$$A = (\epsilon_{\text{NOH}} - \epsilon_{\text{NO}^-}) [\text{NOH}] + (\epsilon_{\text{NO}^-})c_0$$

and

$$c_0 = [\text{NOH}] + [\text{NO}^-]$$

$$A_{238(\text{Buffer})} = .250$$

$$\epsilon_{(\text{NOH})} = 9876.317$$

$$\epsilon_{(\text{NO}^-)} = 33141.21$$

$$c_0 = 1.388 \times 10^{-5} M$$

$$[\text{NOH}] = \frac{A - ((\epsilon_{\text{NO}^-})c_0)}{(\epsilon_{\text{NOH}} - \epsilon_{\text{NO}^-})}$$

$$[\text{NOH}] = \frac{.25 - ((33141.21)(1.388 \times 10^{-5}))}{(9876.317 - 33141.21)}$$

$$[\text{NOH}] = (9.026 \times 10^{-6} M)$$

$$c_0 - [\text{NOH}] = [\text{NO}^-]$$

$$(1.388 \times 10^{-5} M) - (9.026 \times 10^{-6} M) = (4.854 \times 10^{-6} M)$$

$pK_a$  for the buffered solution was determined using the following equation:

$$pK_a = \text{pH} + \log\left(\frac{[\text{NOH}]}{[\text{NO}^-]}\right)$$

$$pK_a = 9.48 + \log\left(\frac{[9.026 \times 10^{-6} M]}{[4.854 \times 10^{-6} M]}\right)$$

$$pK_a = 9.75$$

Next you must first determine the wavelength at which the two graphs intersect in the overlay for both the acidic and basic solutions:

0-0 energy of acidic solution: 332 nm

0-0 energy of basic solution: 370 nm

Afterward, use this equation to determine the corresponding wavenumbers ( $\nu_{OH}$  &  $\nu_{NO^-}$ ):

$$\nu = \left( \frac{10^7}{\text{wavelength (nm)}} \right)$$

$$\nu_{OH} = 30120 \text{ cm}^{-1}$$

$$\nu_{NO^-} = 27027 \text{ cm}^{-1}$$

To calculate the  $pK_a^*$  the following forster equation was used:

$$pK_a^* = pK_a - \left( \frac{[N_0 h c]}{[2.303 R T]} \right) (\nu_{OH} - \nu_{NO^-})$$

$\nu$  = wavenumber based on 0-0 energy for acidic and basic solutions

$N_o = \text{Avagrado's number} = (6.022 \times 10^{23})$

$h = \text{Planck's constant} = (6.626 \times 10^{-34})$

$c = \text{speed of light (cm)} = (3 \times 10^{10})$

$R = \text{Gas Constant} = 8.3145$

$T = \text{Room Temp (K)} = 298$

$$pK_a^* = 9.75 - \left( \frac{[(6.022 \times 10^{23})(6.626 \times 10^{-34})(3 \times 10^{10})]}{[2.303(8.3145)(298)]} \right) (30120 - 27027)$$

$$pK_a^* = 3.26$$

### 6-bromo-2-naphthol (3):

The following aqueous stock solutions were prepared:

- 1 mg in 50 mL; 6-Bromo-2-Naphthol (6-Bromo) solution
- 0.10 M HCl
- 0.10 M NaOH
- 0.20 M 1:1 NH<sub>3</sub>-NH<sub>4</sub>Cl buffer solution

Afterward, the solutions being analyzed were prepared in the following ratio:

- Acidic Solution: 10 mL of HCl solution, 5 mL of (6-Bromo) solution diluted up to 50 mL with DI water
- Basic Solution: 10 mL of NaOH solution, 5 mL of (6-Bromo) solution diluted up to 50 mL with DI water
- Buffer Solution: 10 mL of Buffer solution, 5 mL of (6-Bromo) solution diluted up to 50 mL with DI water

The pH for those solutions were as follows:

- Acidic: 1.73
- Basic: 12.45
- Buffer: 9.51

The three solutions were analyzed using UV-Vis and Fluorometer (Figures S14 and S15):

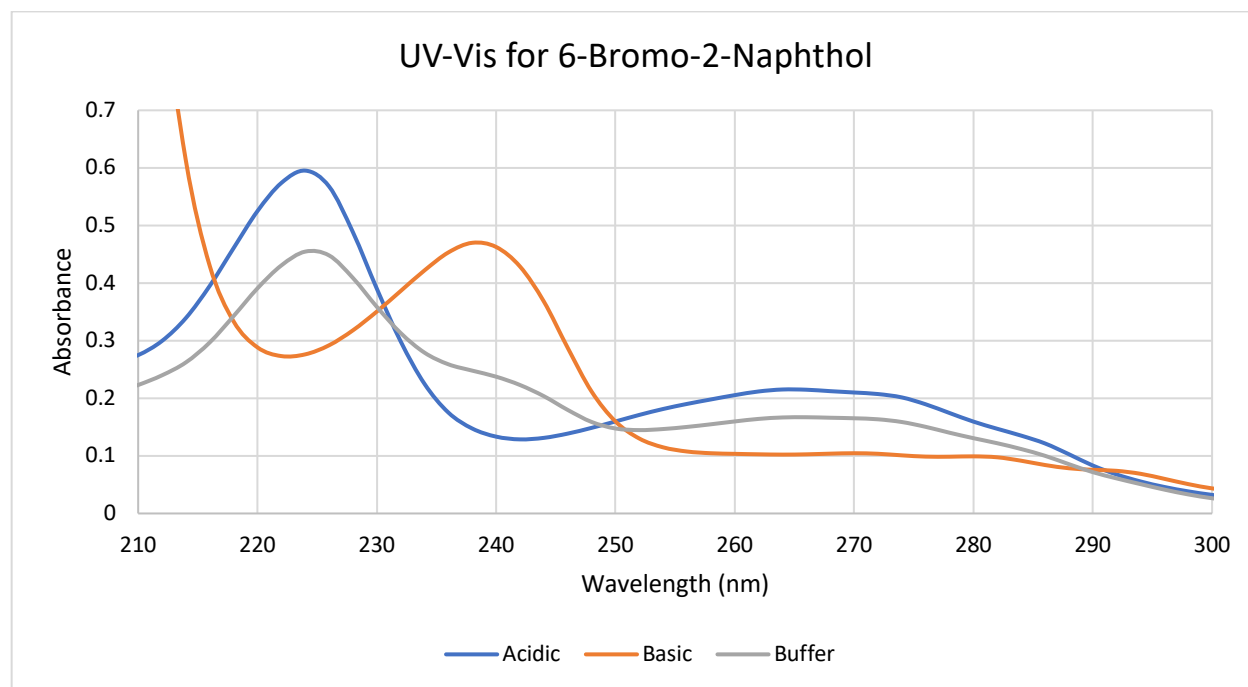

**Figure S14:** UV-Vis for the Acidic, Basic, and Buffer solutions of **3**.

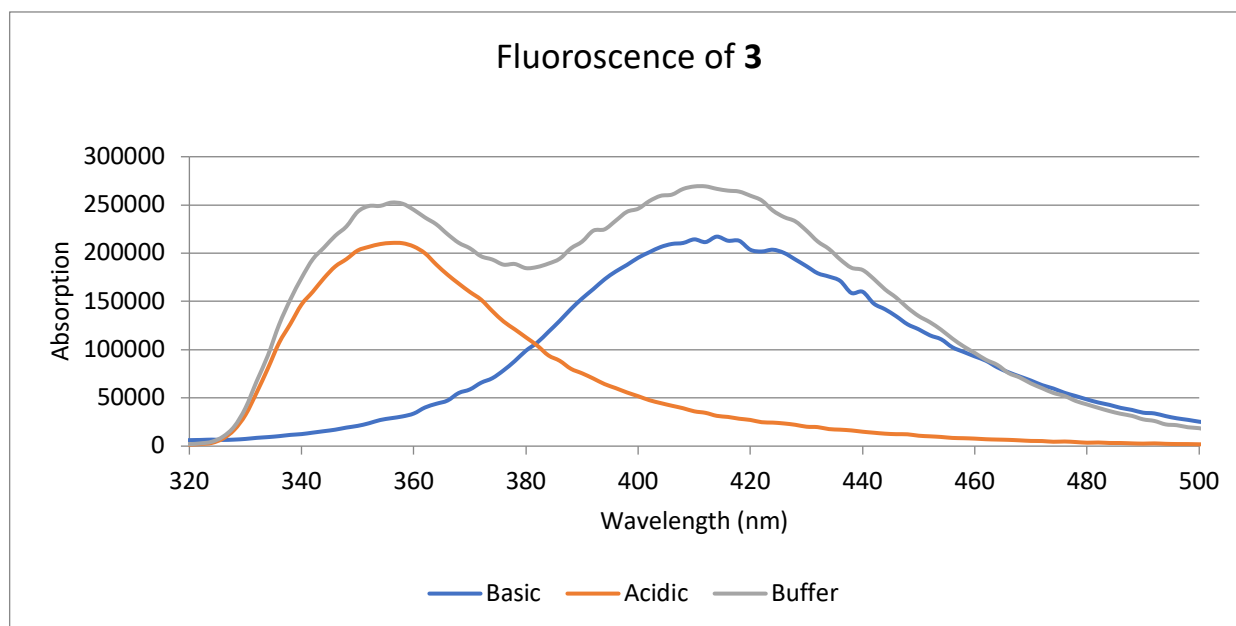

**Figure S15:** Fluorescence spectra for the acidic, basic, and buffer solutions of **3**.

The 0-0 energy was calculated by overlaying the UV-Vis and fluorometer graphs for the acidic (Figure S16) and basic (Figure S17) solutions (Excitation wavelength: 274 nm).

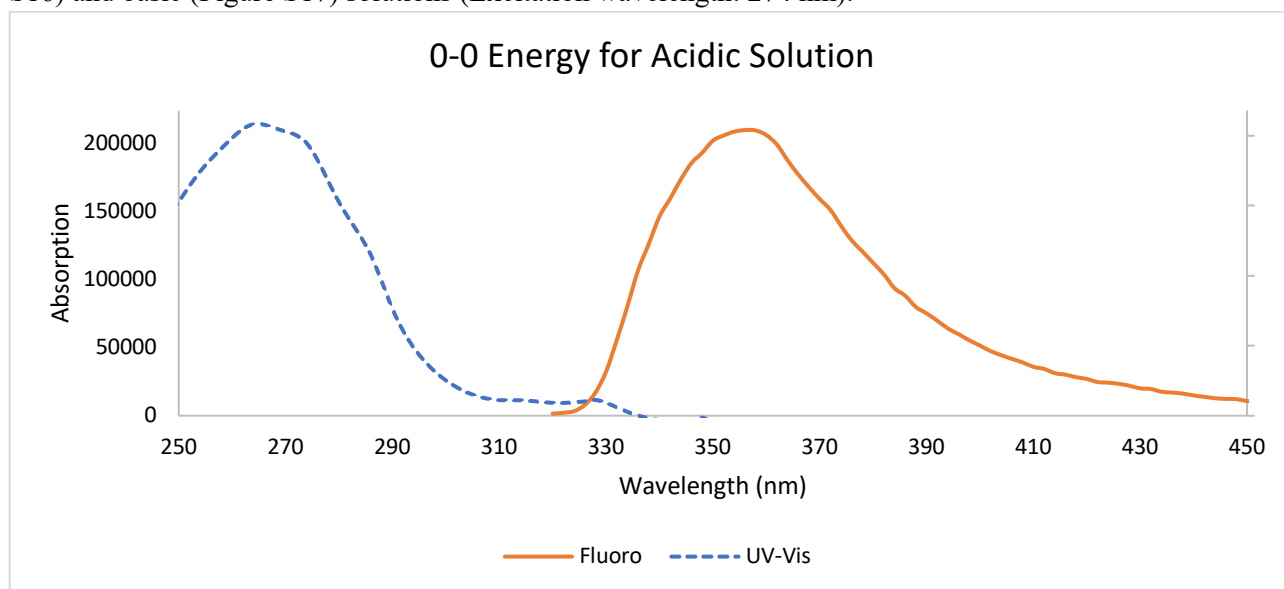

**Figure S16:** Fluorescence and UV-Vis overlay of the acidic solution for **3** (Excitation wavelength: 274 nm).



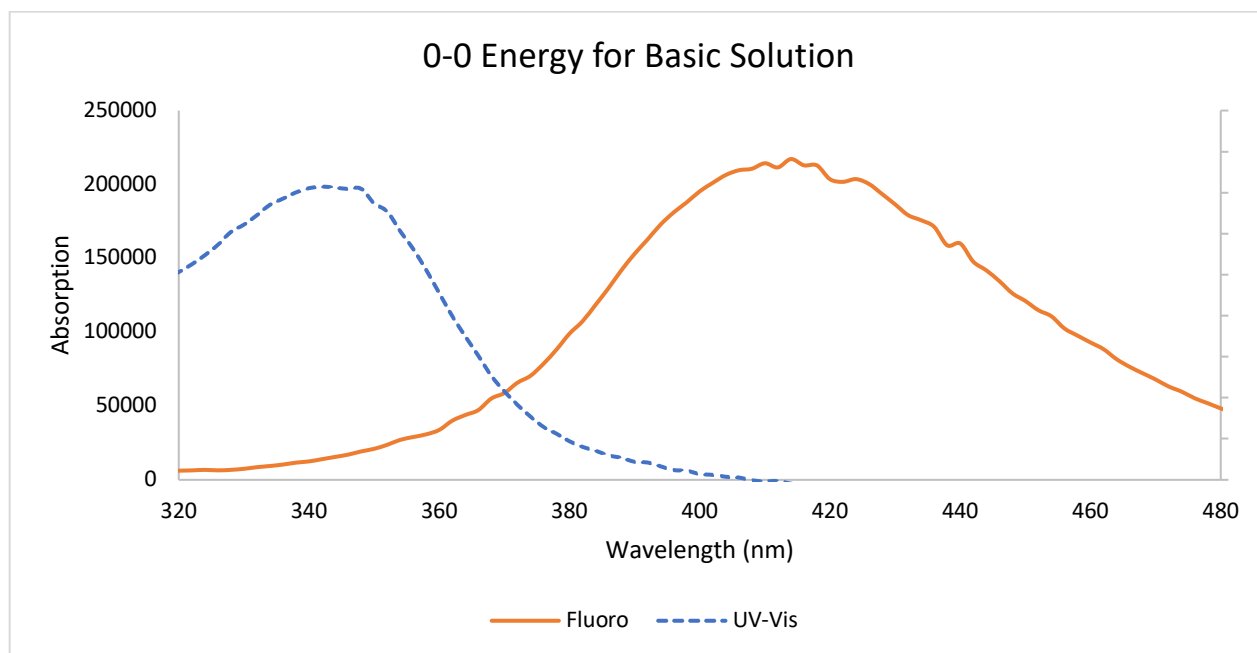

**Figure S17:** Fluorescence and UV-Vis spectra overlay of the basic solution for **3** (Excitation wavelength: 274 nm).

The following calculations were performed to determine pKa and pKa\*:

To begin we must figure out the concentration of the analyte in the three solutions being tested;

$$M_1 V_1 = M_2 V_2$$

$$(8.97 \times 10^{-4} \text{M})(5 \text{ mL}) = M_2 (50 \text{ mL})$$

$$M_2 = 8.97 \times 10^{-5} \text{M} = c_0$$

We must also calculate the molar absorptivity ( $\epsilon$ ) of the acidic and basic forms of 6-Bromo-2-naphthol at the wavelength of maximum absorbance for the **conjugate base** form from UV-Vis graphs:

$$A = \epsilon b c_0$$

$$c_0 = 8.97 \times 10^{-5} \text{M}$$

$$b = 1 \text{ cm}$$

$$A_{238(\text{NOH})} = .147$$

$$A_{238(\text{NO-})} = .469$$

$$\epsilon_{(\text{NOH})} = \frac{.147}{(8.97 \times 10^{-5})} = 1638.796$$

$$\epsilon_{(\text{NO-})} = \frac{.469}{(8.97 \times 10^{-5})} = 5228.539$$

Afterwards we can calculate the concentration of the (NOH) and (NO<sup>-</sup>) in the buffer using the absorbance at the wavelength used previously and the following equations:

$$A = (\epsilon_{\text{NOH}} - \epsilon_{\text{NO}^-}) [\text{NOH}] + (\epsilon_{\text{NO}^-})c_0$$

and

$$c_0 = [\text{NOH}] + [\text{NO}^-]$$

$$A_{238(\text{Buffer})} = .250$$

$$\epsilon_{(\text{NOH})} = 1638.796$$

$$\epsilon_{(\text{NO}^-)} = 5228.539$$

$$c_0 = 8.97 \times 10^{-5} M$$

$$[\text{NOH}] = \frac{A - (\epsilon_{\text{NO}^-})c_0}{(\epsilon_{\text{NOH}} - \epsilon_{\text{NO}^-})}$$

$$[\text{NOH}] = \frac{.25 - (5228.539)(8.97 \times 10^{-5})}{(1638.796 - 5228.539)}$$

$$[\text{NOH}] = (6.101 \times 10^{-5} M)$$

$$c_0 - [\text{NOH}] = [\text{NO}^-]$$

$$(8.97 \times 10^{-5} M) - (6.101 \times 10^{-5} M) = (2.87 \times 10^{-5} M)$$

pK<sub>a</sub> for the buffered solution was determined using the following equation:

$$\text{pK}_a = \text{pH} + \log\left(\frac{[\text{NOH}]}{[\text{NO}^-]}\right)$$

$$\text{pK}_a = 9.51 + \log\left(\frac{[6.101 \times 10^{-5} M]}{[2.87 \times 10^{-5} M]}\right)$$

$$\text{pK}_a = 9.84$$

Next, you must first determine the wavelength at which the two graphs intersect in the overlay for both the acidic and basic solutions:

1-0 energy of acidic solution: 328 nm

1-0 energy of basic solution: 374 nm

Afterwards use this equation to determine the corresponding wavenumbers ( $\nu_{\text{OH}}$  &  $\nu_{\text{NO}^-}$ ):

$$\nu = \left( \frac{10^7}{\text{wavelength (nm)}} \right)$$

$$\nu_{OH} = 30487.8 \text{ cm}^{-1}$$

$$\nu_{NO^-} = 26737.97 \text{ cm}^{-1}$$

To calculate the  $pK_a^*$  the following forster equation was used:

$$pK_a^* = pK_a - \left( \frac{[N_o h c]}{[2.303 R T]} \right) (\nu_{OH} - \nu_{NO^-})$$

$\nu$  = wavenumber based on 0-0 energy for acidic and basic solutions

$$N_o = \text{Avagadro's number} = (6.022 \times 10^{23})$$

$$h = \text{Planck's constant} = (6.626 \times 10^{-34})$$

$$c = \text{speed of light (cm)} = (3 \times 10^{10})$$

$$R = \text{Gas Constant} = 8.3145$$

$$T = \text{Room Temp (K)} = 298$$

$$pK_a^* = 9.84 - \left( \frac{[(6.022 \times 10^{23})(6.626 \times 10^{-34})(3 \times 10^{10})]}{[2.303(8.3145)(298)]} \right) (30487.8 - 26737.97)$$

$$pK_a^* = 1.976$$

The singlet excited-state lifetimes for 2-naphthol (**5**,  $\tau = 6.8$  ns) and 6-bromo-2-naphthol (**3**,  $\tau = 0.049$  ns) were measurements in 80% ethanol (Figures S18 and S19). The short-lived  $S_1$  excited state for **3** is attributed to rapid intersystem crossing into a triplet excited state (not measured) due to the heavy atom effect (bromine).

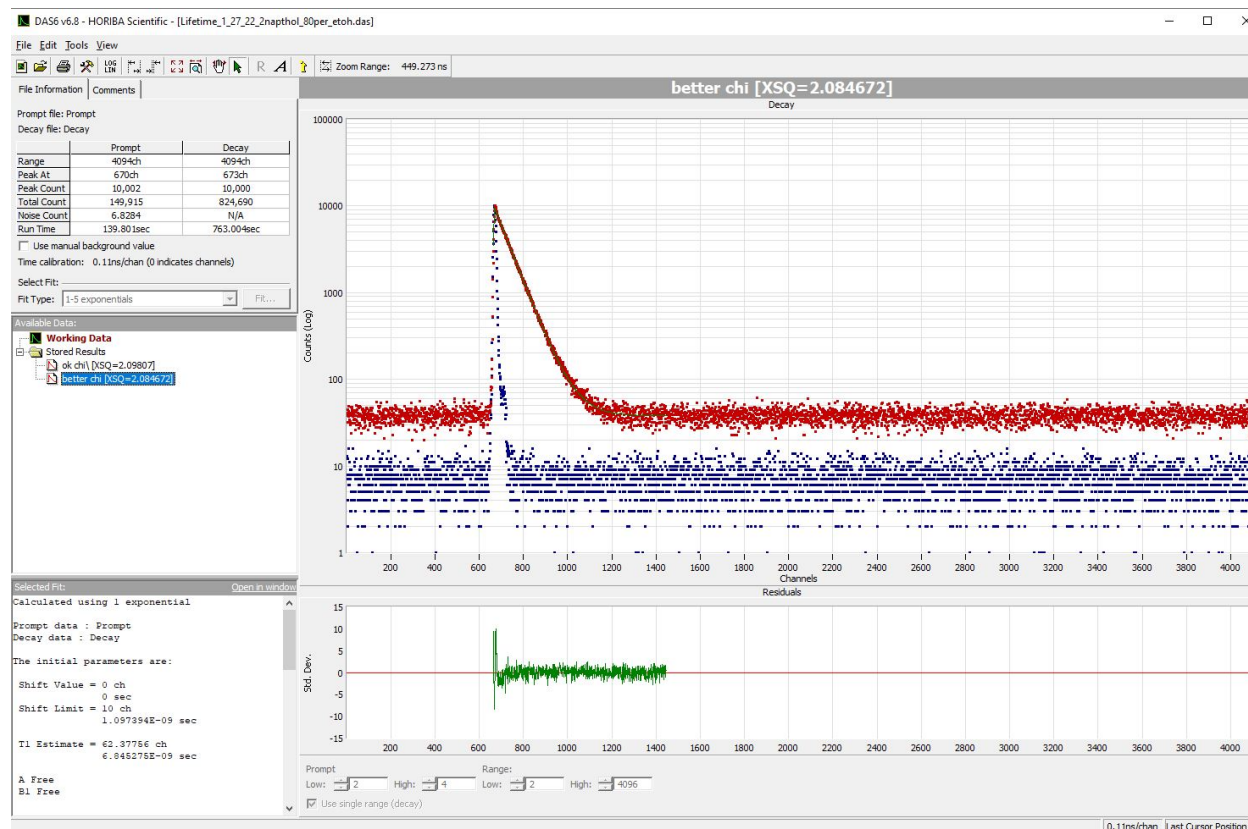

**Scheme S18:** Singlet excited-state spectrum for 2-naphthol (**5**) in 80% ethanol.

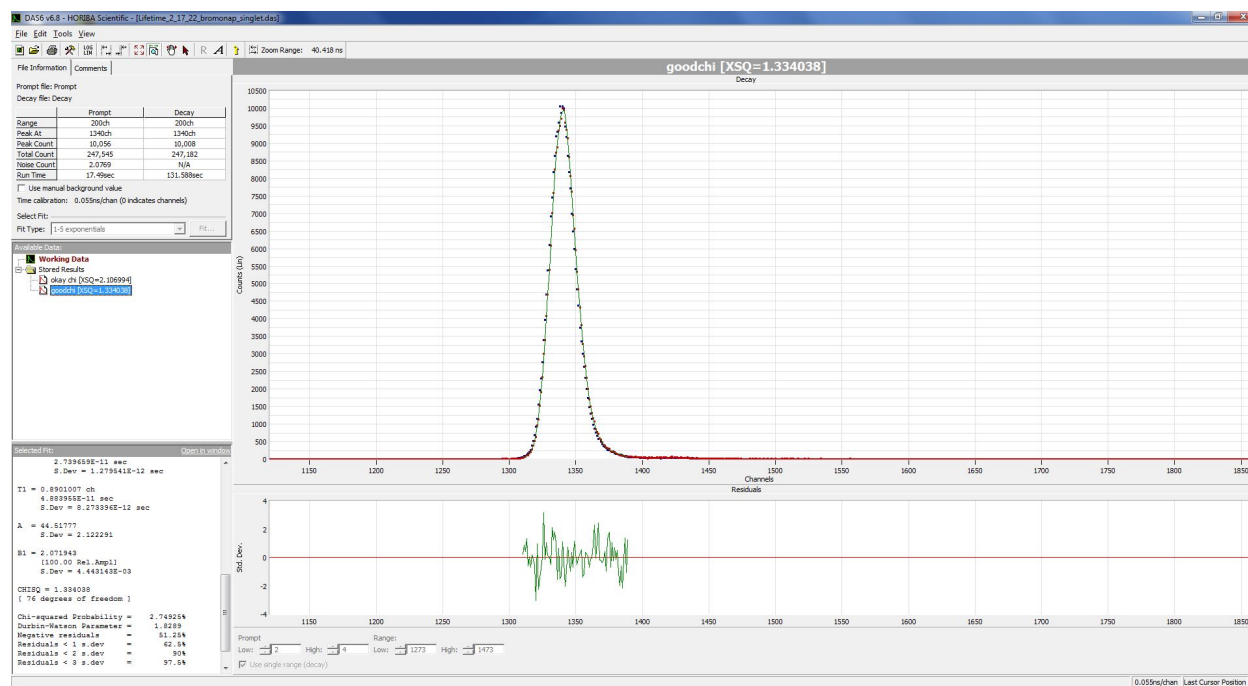

**Scheme S19:** Singlet excited-state spectrum for 6-bromo-2-naphthol (**3**) in 80% ethanol.

### VIII. Kessil LED set-up and emission spectra:

The general setup for the photoacid catalyzed procedure is shown in Figure S20.

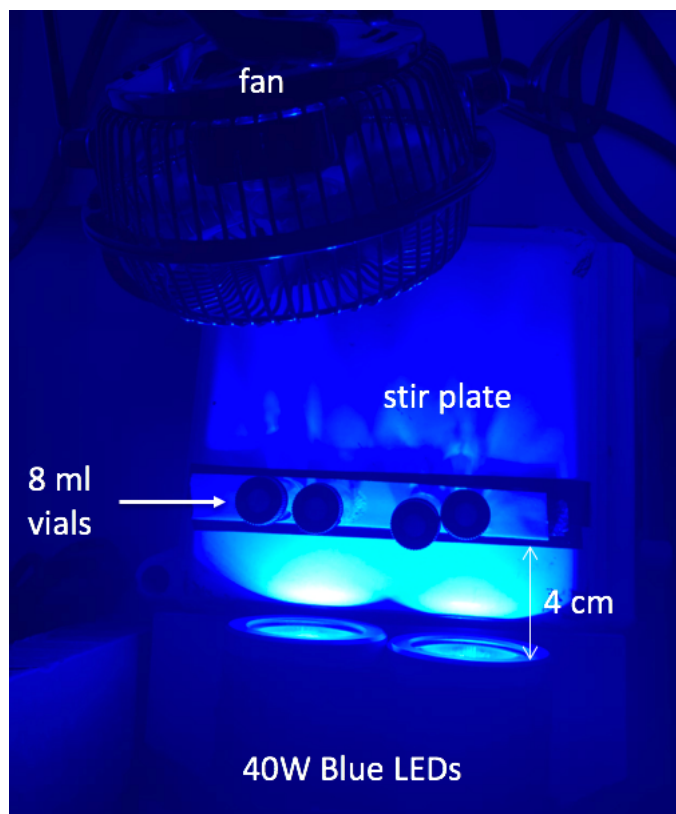

**Figure S20:** General reaction setup.

We thank Kessil (<https://kessil.com/science/PR160L.php>) for providing the emission spectra for the PR160L - 370 nm, 456 nm, 390 nm, and 160WE 40W Tuna Blue LEDs shown in Figures S21- S24, respectively. The Tuna Blue LEDs used in this study emit strongly from 408-535 nm with weak emission from 372-390 nm. Note: Tuna Blue LEDs are used with %blue and intensity settings maximized.

### PR160L- 370 nm Spectrum

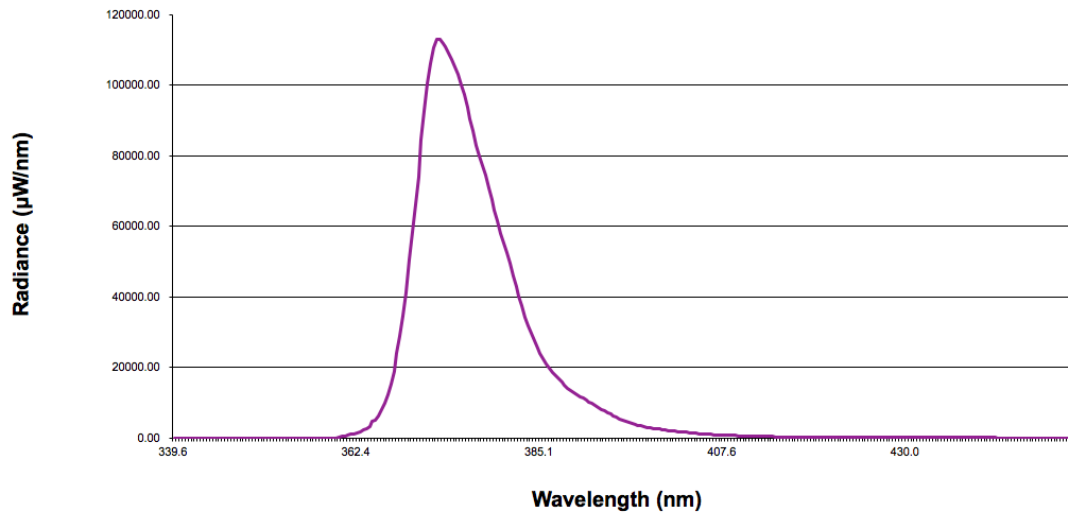

Figure S21: Emission spectrum for Kessil 370 nm LEDs.

### PR160L-456 Spectrum

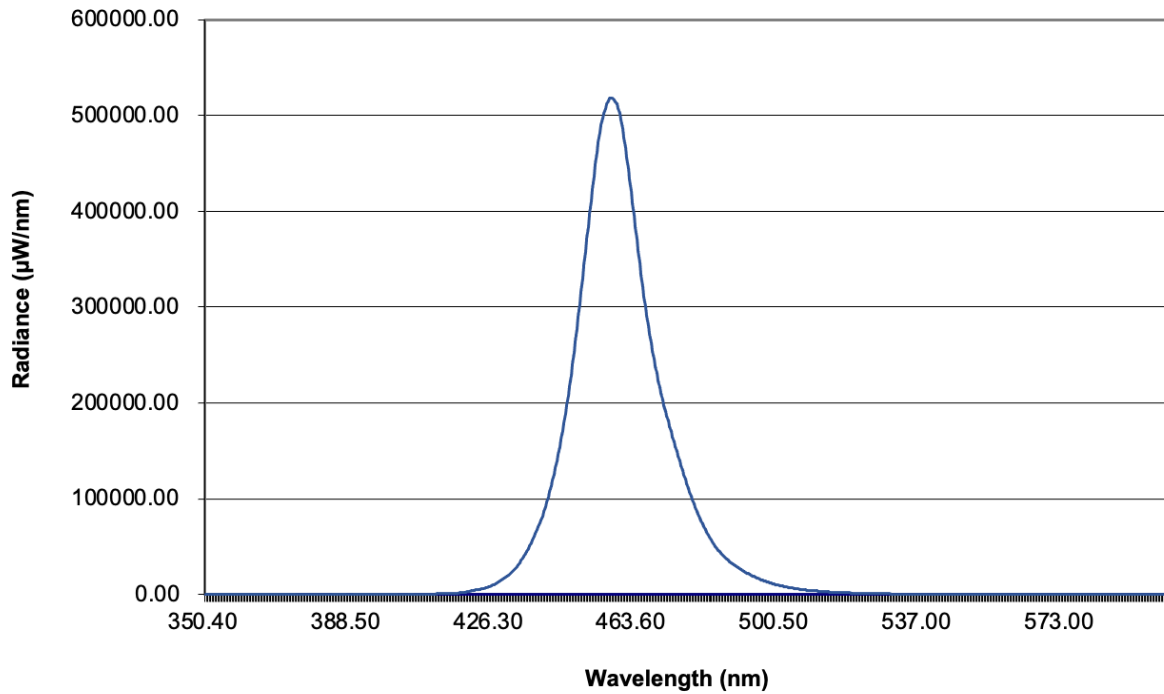

Figure S22: Emission spectrum for Kessil 456 nm LEDs.

**PR160L-390 Spectrum**

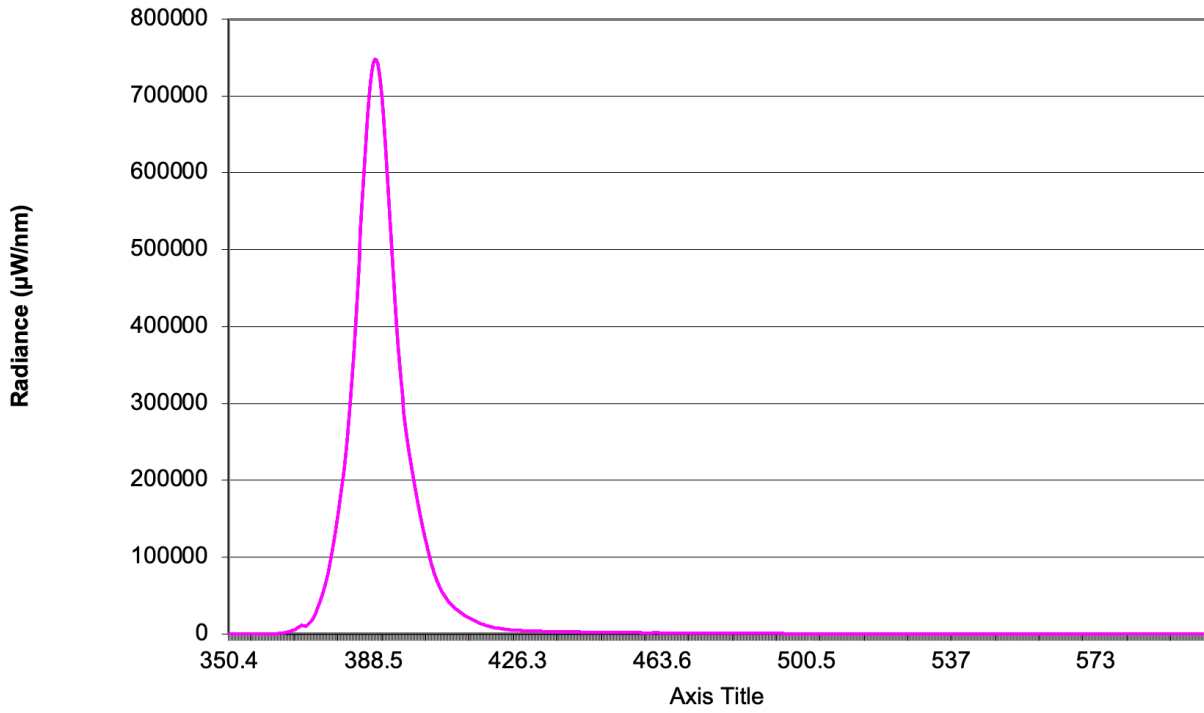

**Figure S23:** Emission spectrum for Kessil 390 nm LEDs.

**A160WE 40W Tuna Blue LED Emission Spectrum**

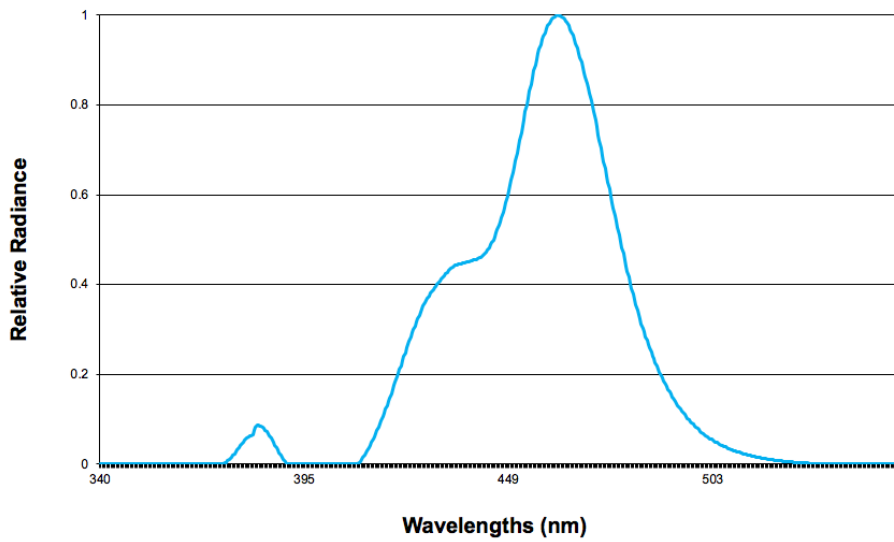

**Figure S24:** Emission spectrum for Kessil Tuna Blue LEDs. Note: This is the “deep ocean” emission spectrum provided by Kessil.



# IX. Spectra:

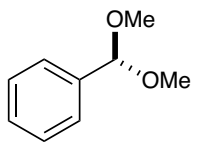

500 MHz, CDCl<sub>3</sub>

7

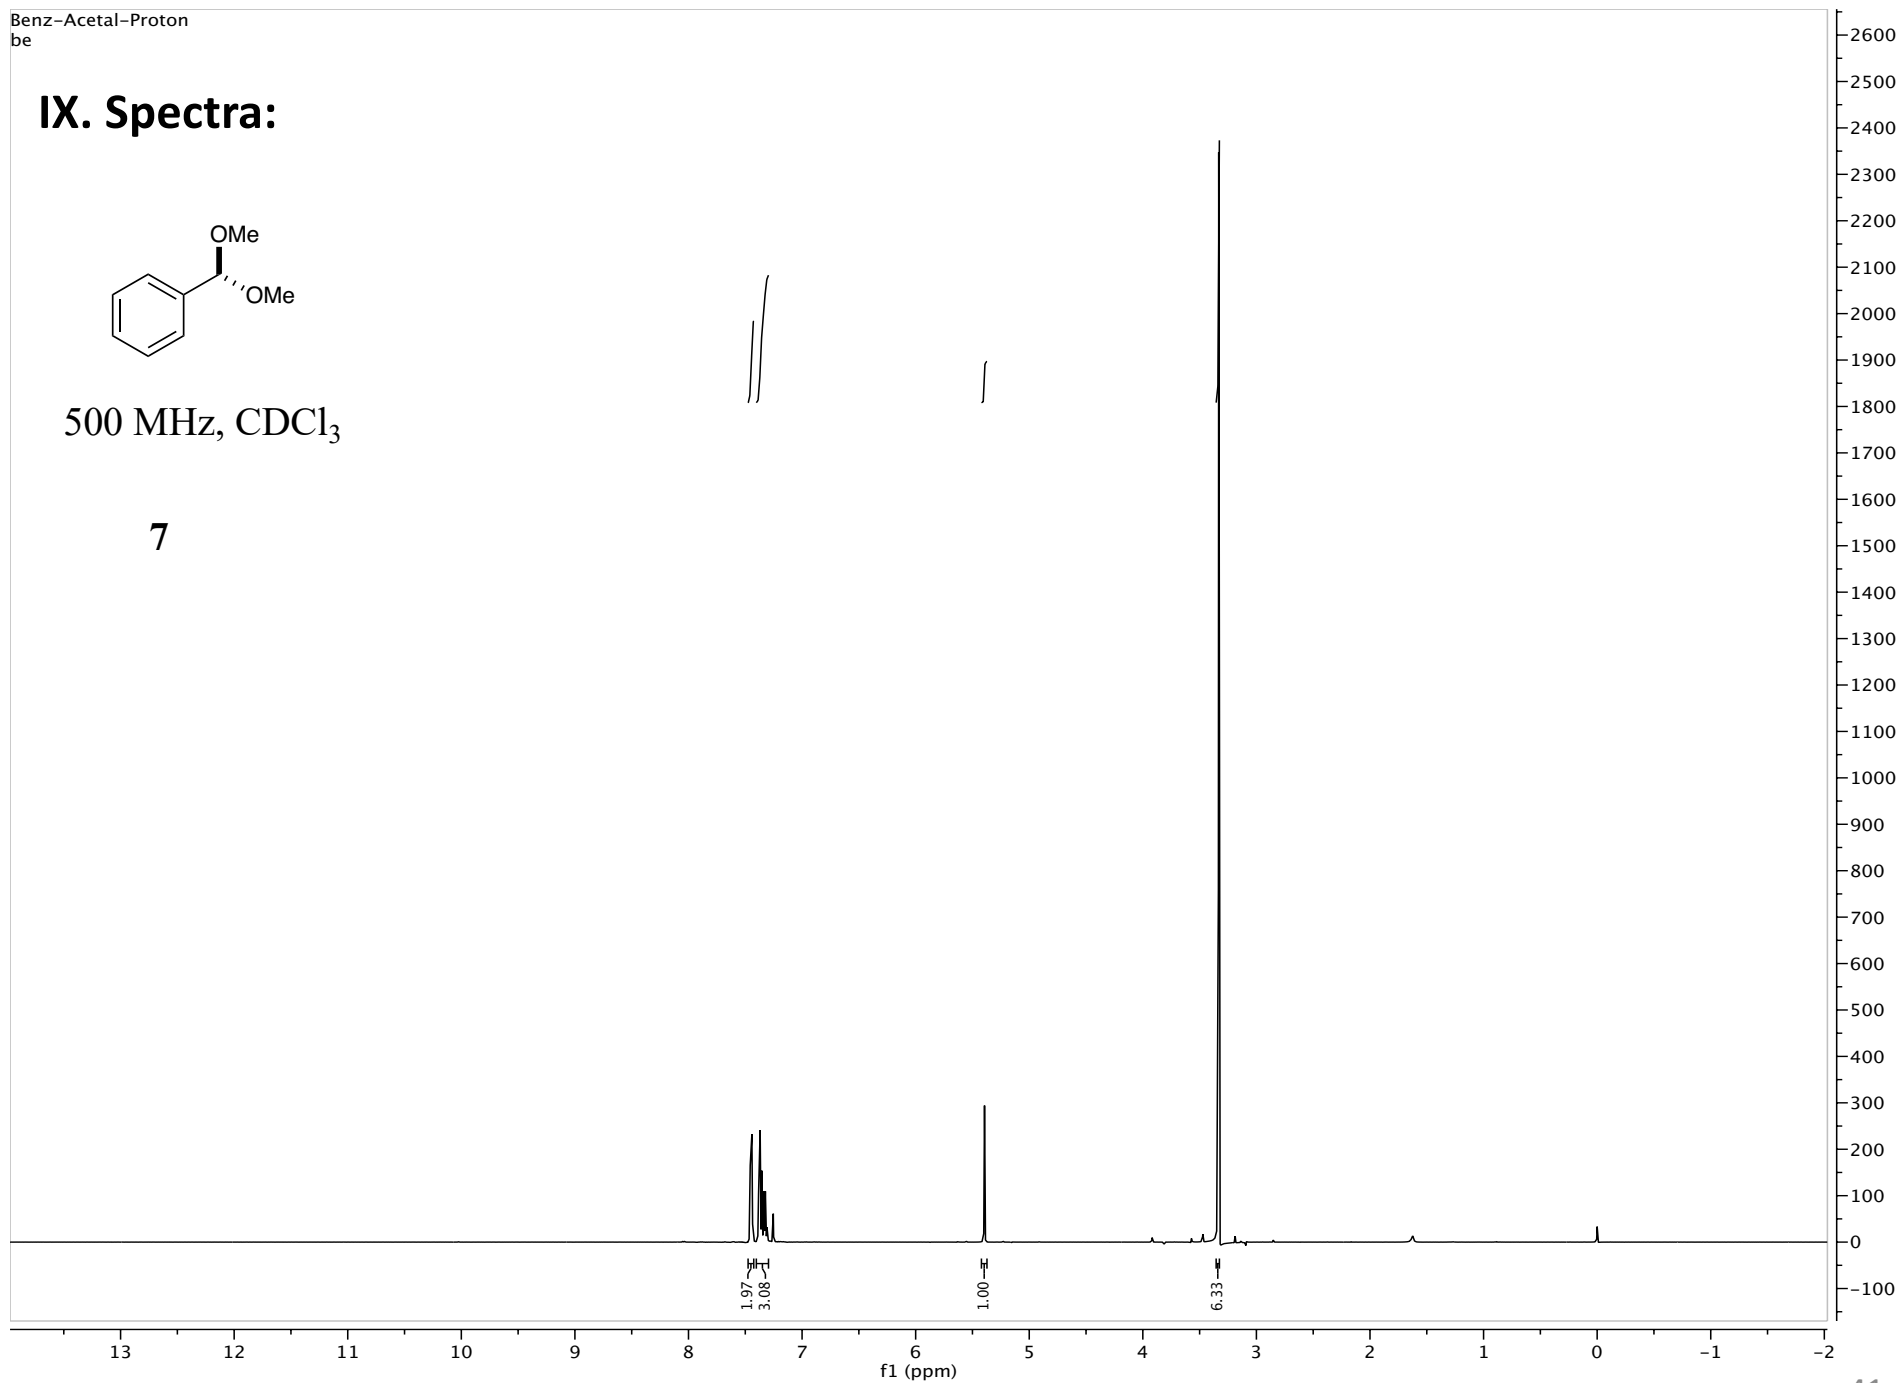

Cyano-Acetal-Retake  
Cyano

500 MHz, CDCl<sub>3</sub>

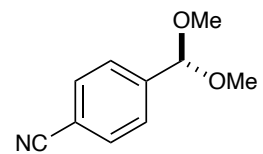

**8**

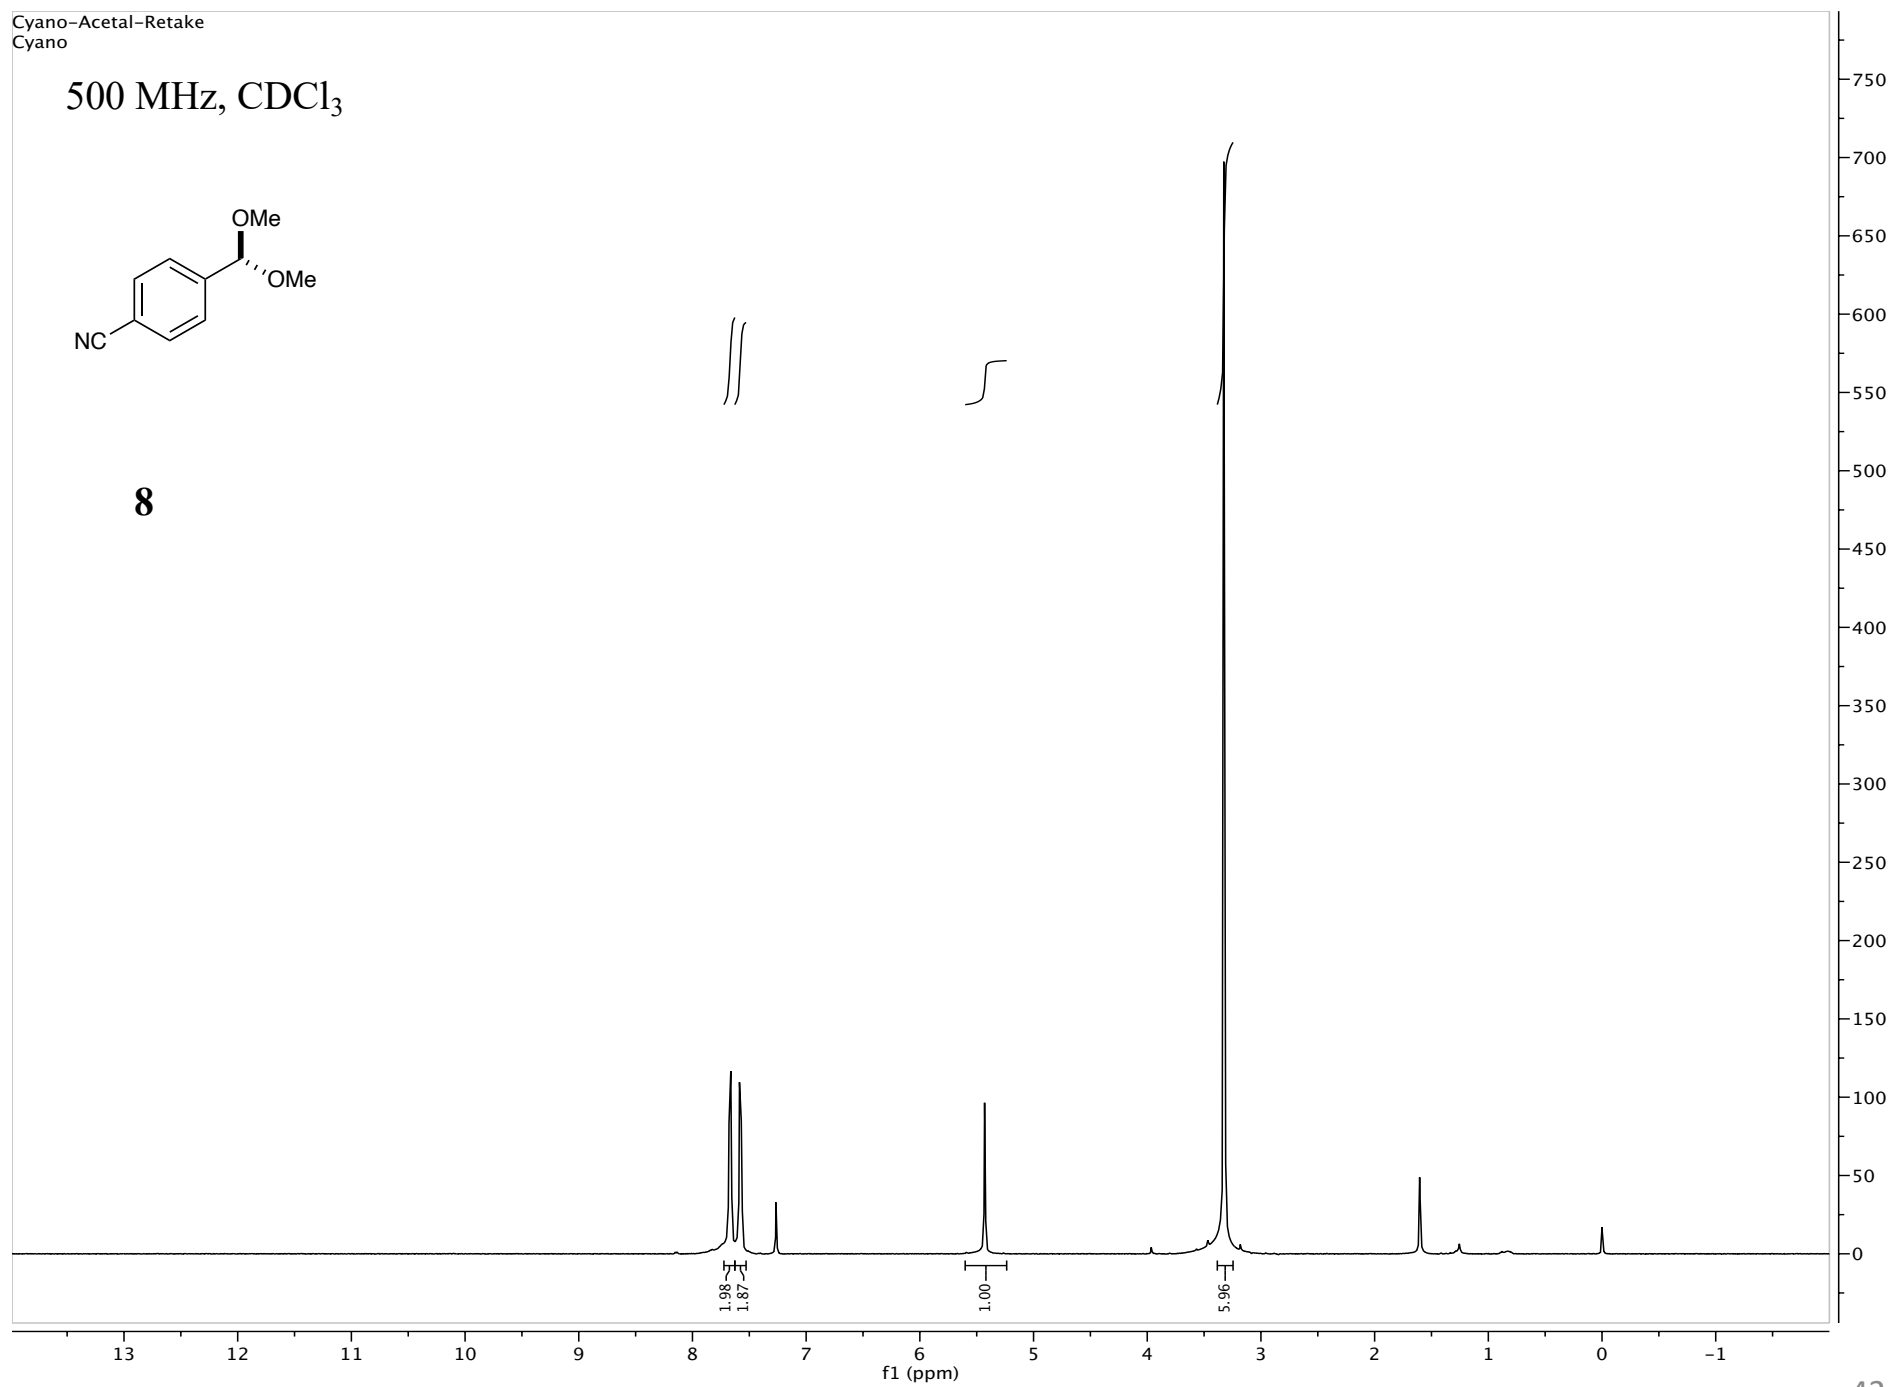

125 MHz, CDCl<sub>3</sub>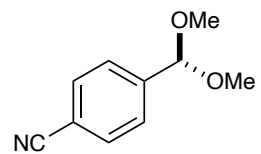**8**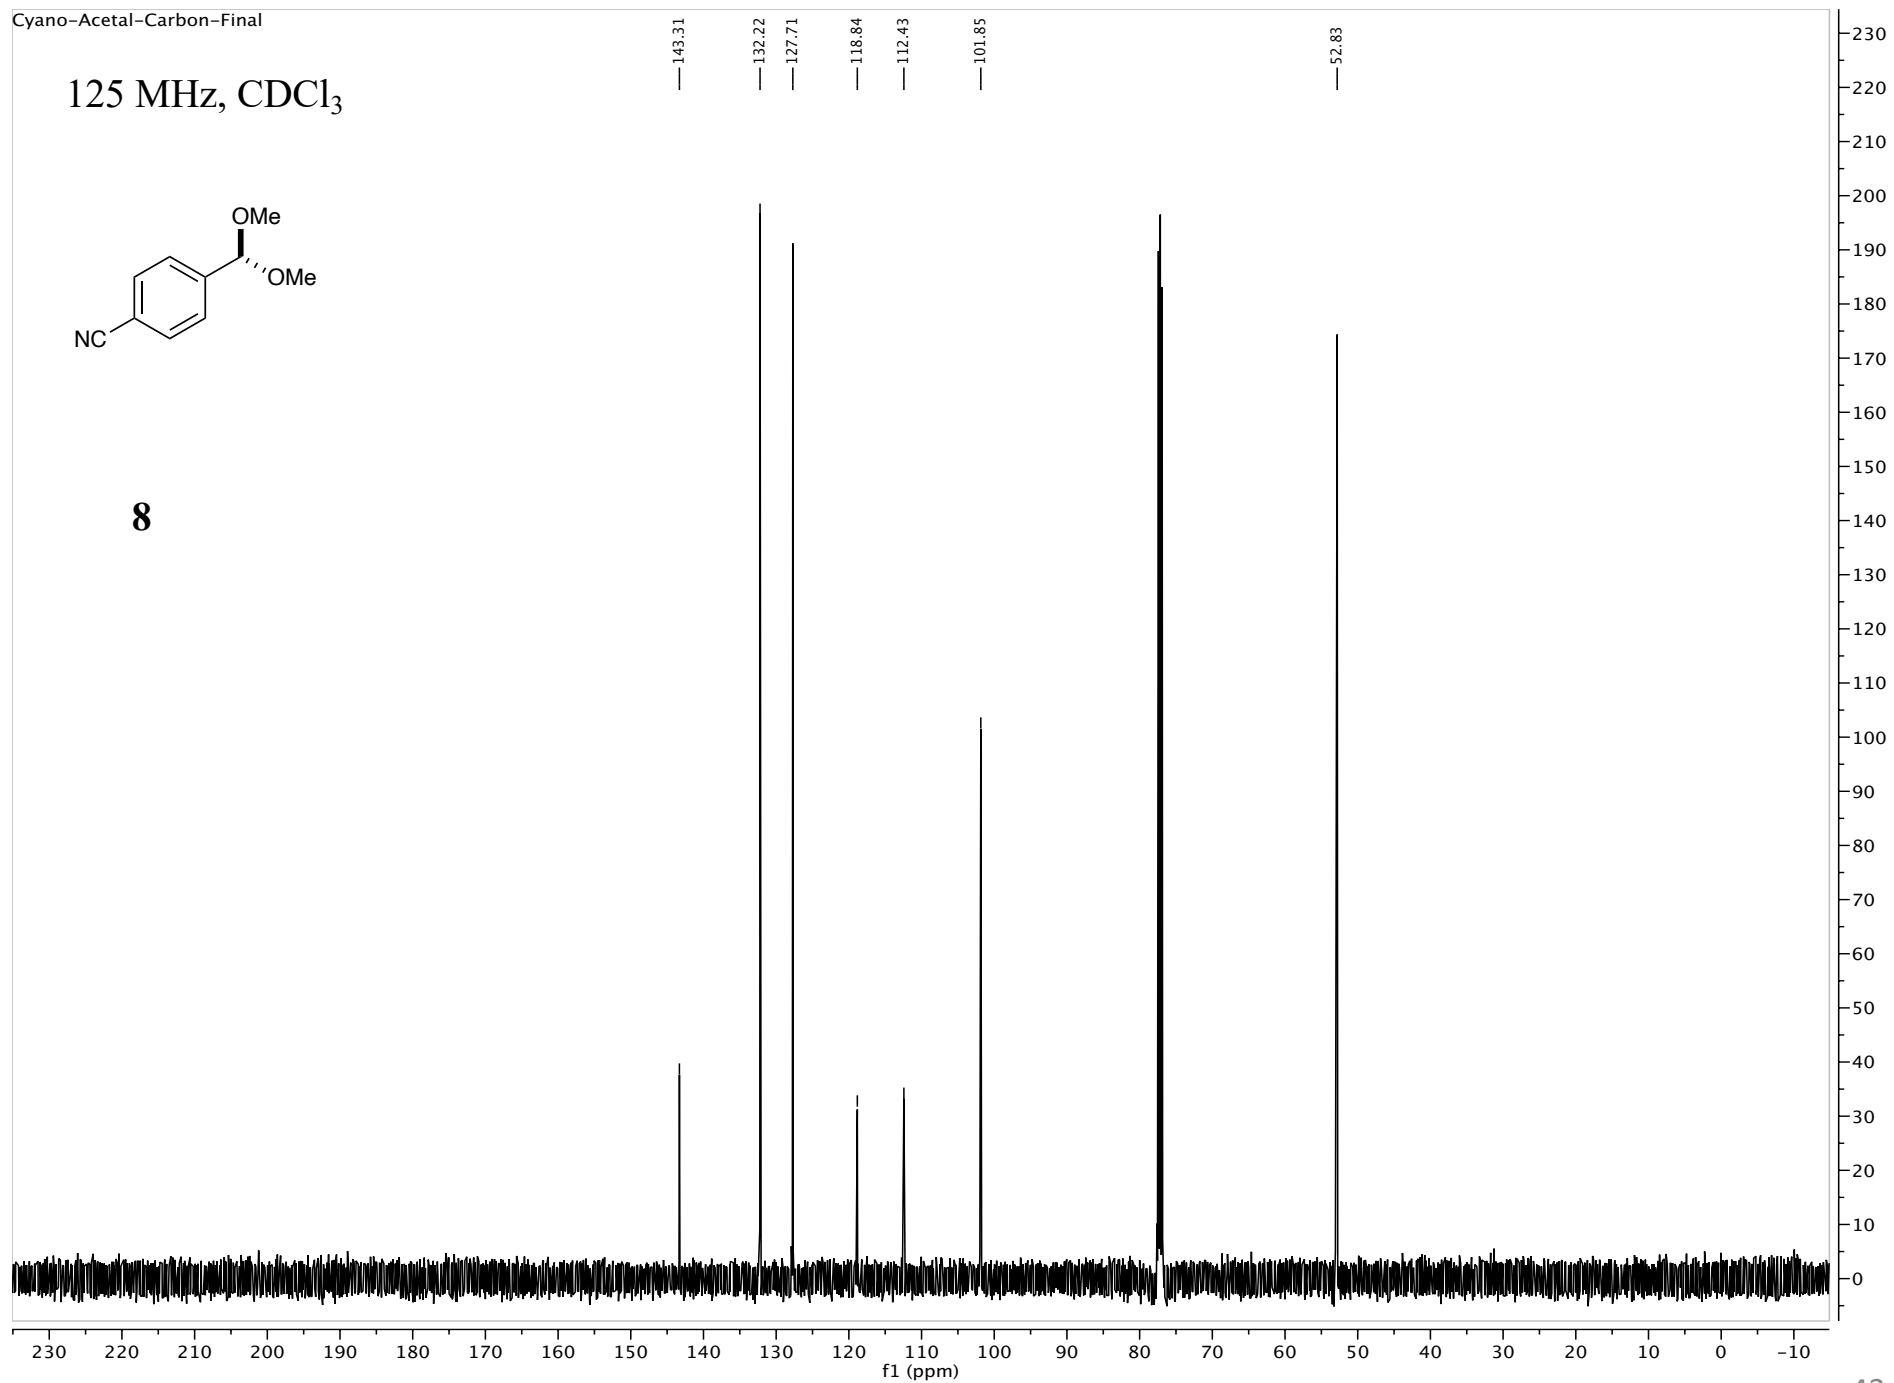

Keto-Acetal-Proton-New  
Ke

500 MHz, CDCl<sub>3</sub>

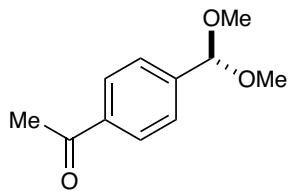

9

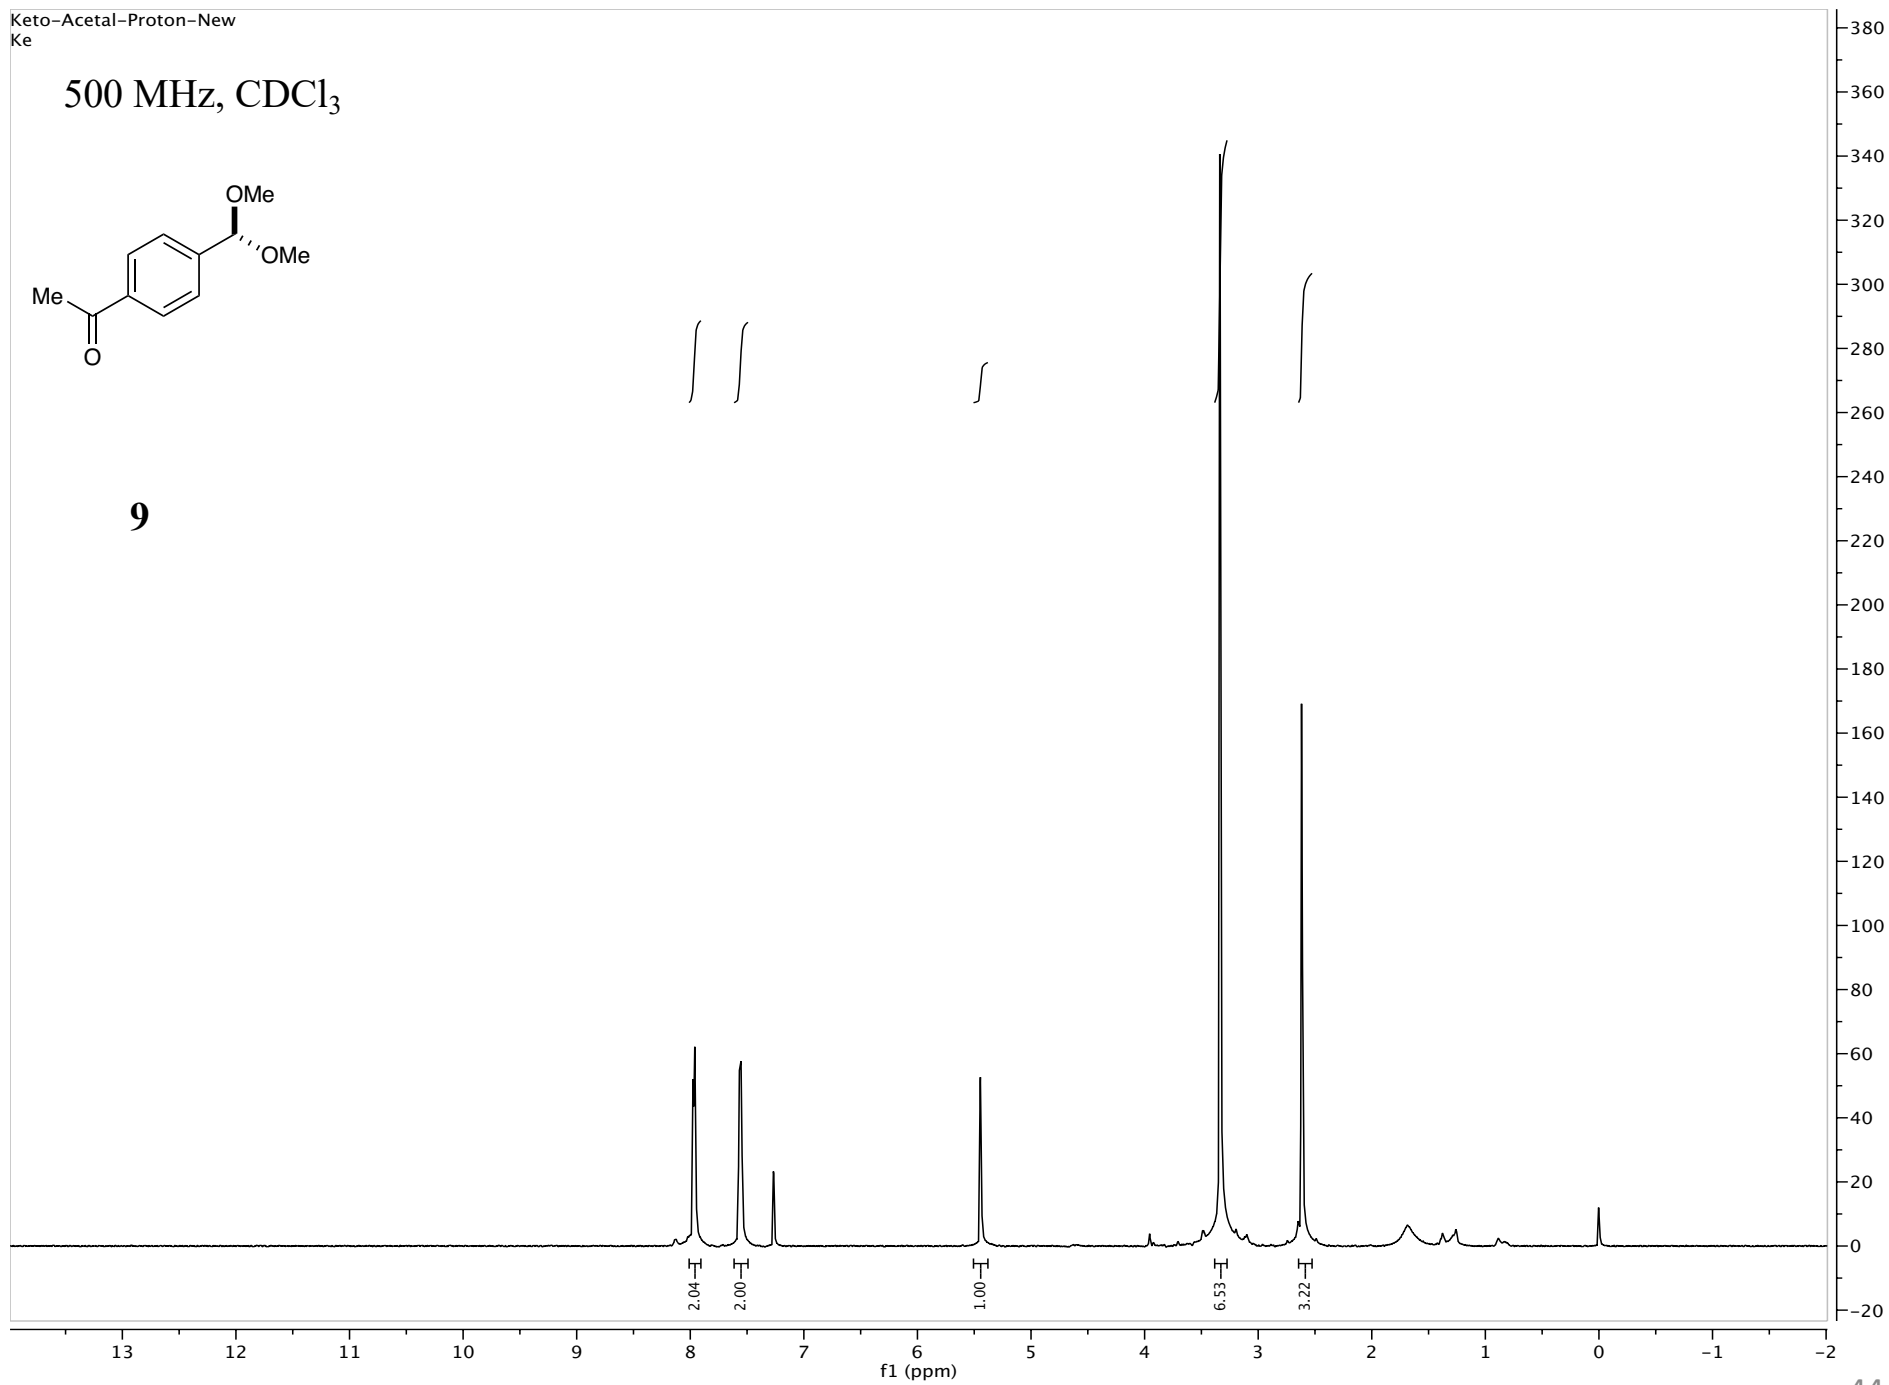

Fluoro-Acetal  
F-2

500 MHz, CDCl<sub>3</sub>

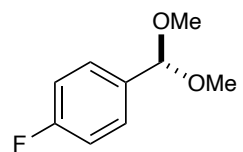

**10**

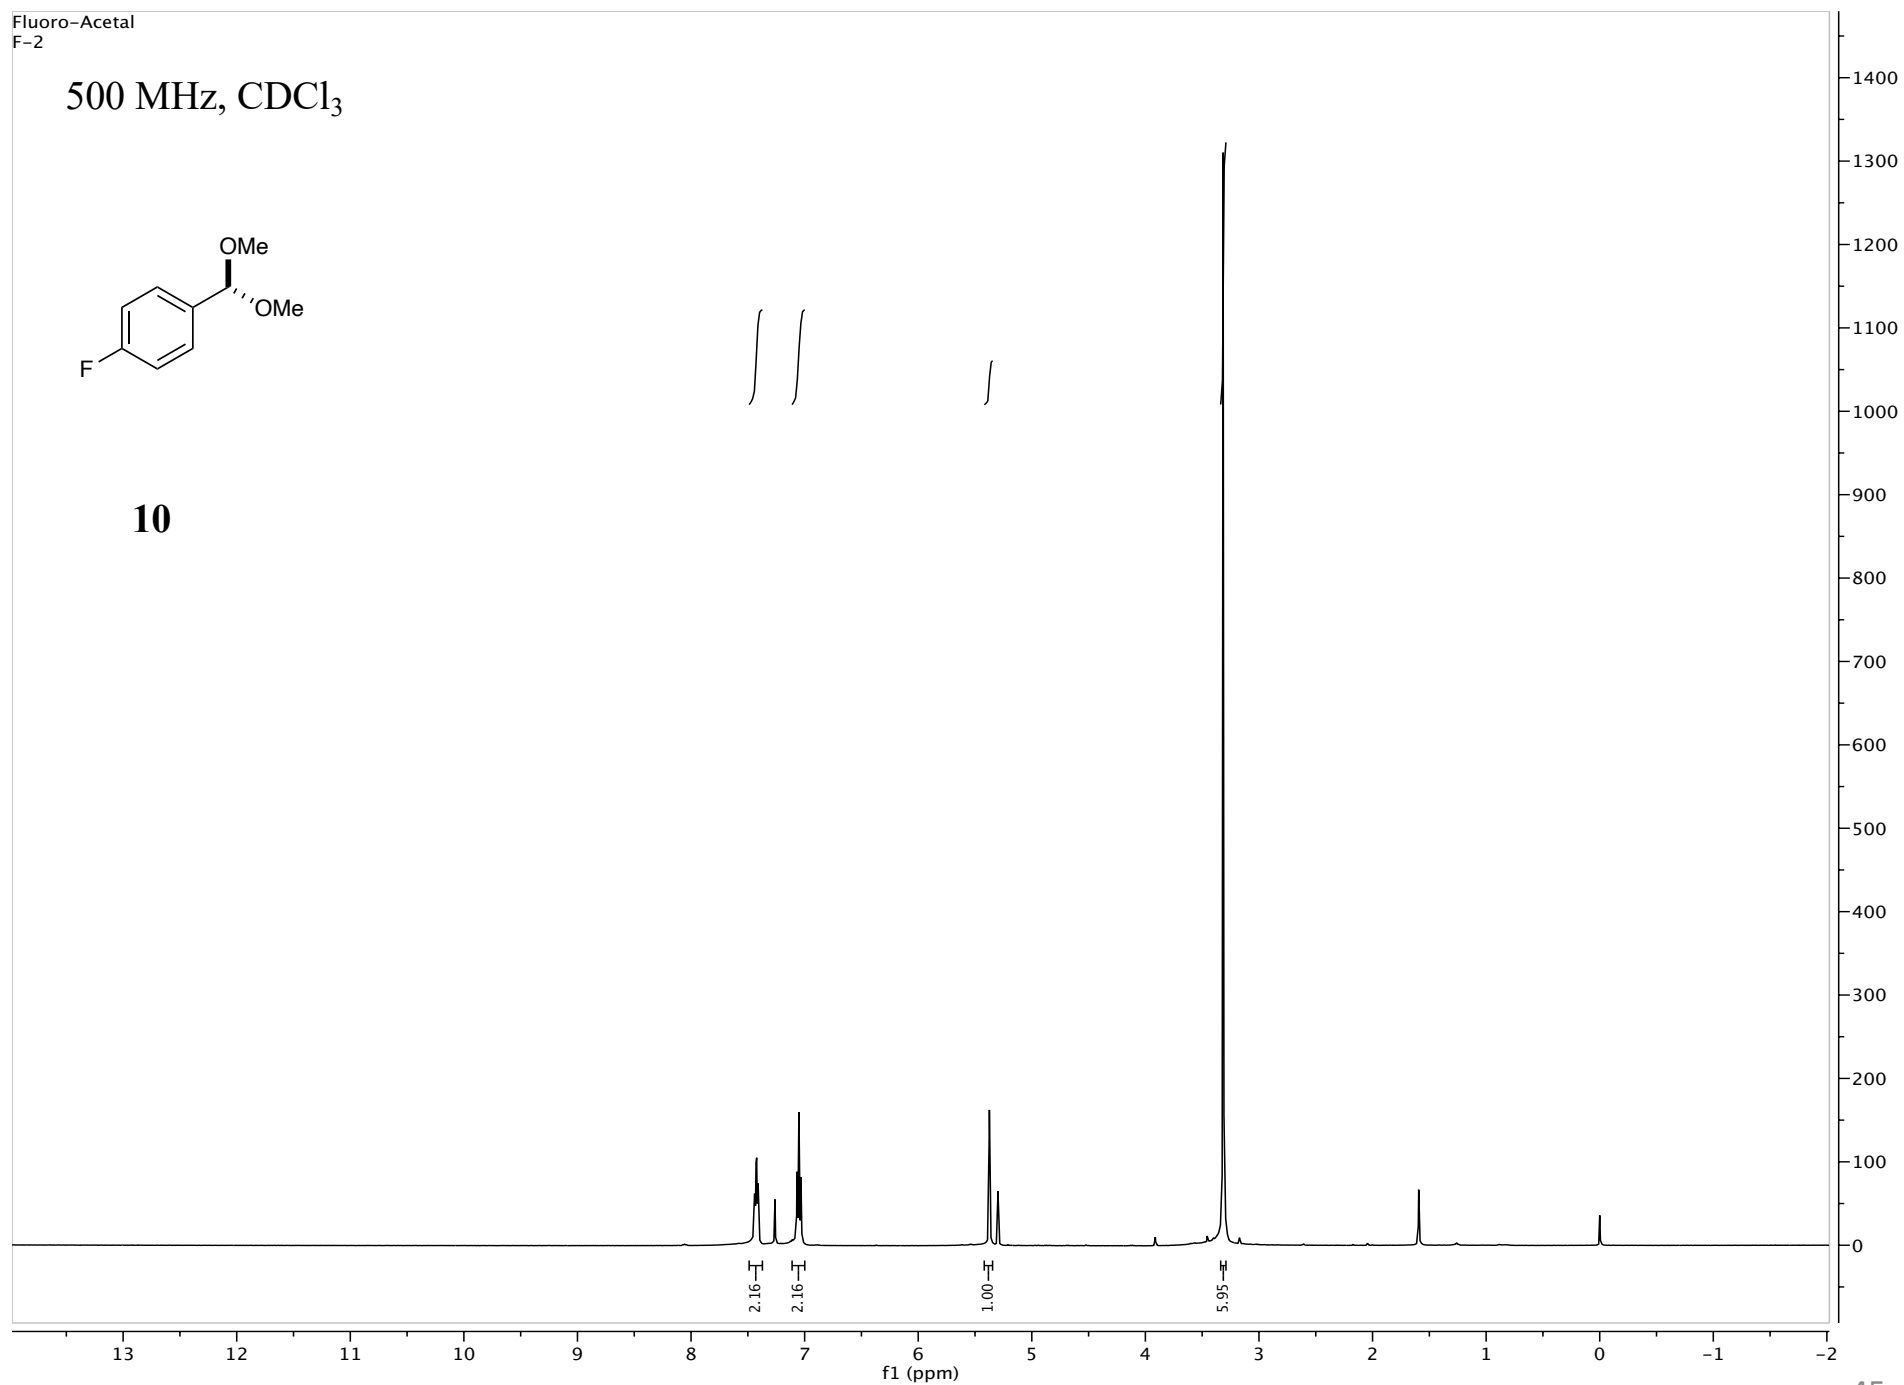

F-Benz-Carbon  
F-Benz-Proton

125 MHz, CDCl<sub>3</sub>



10

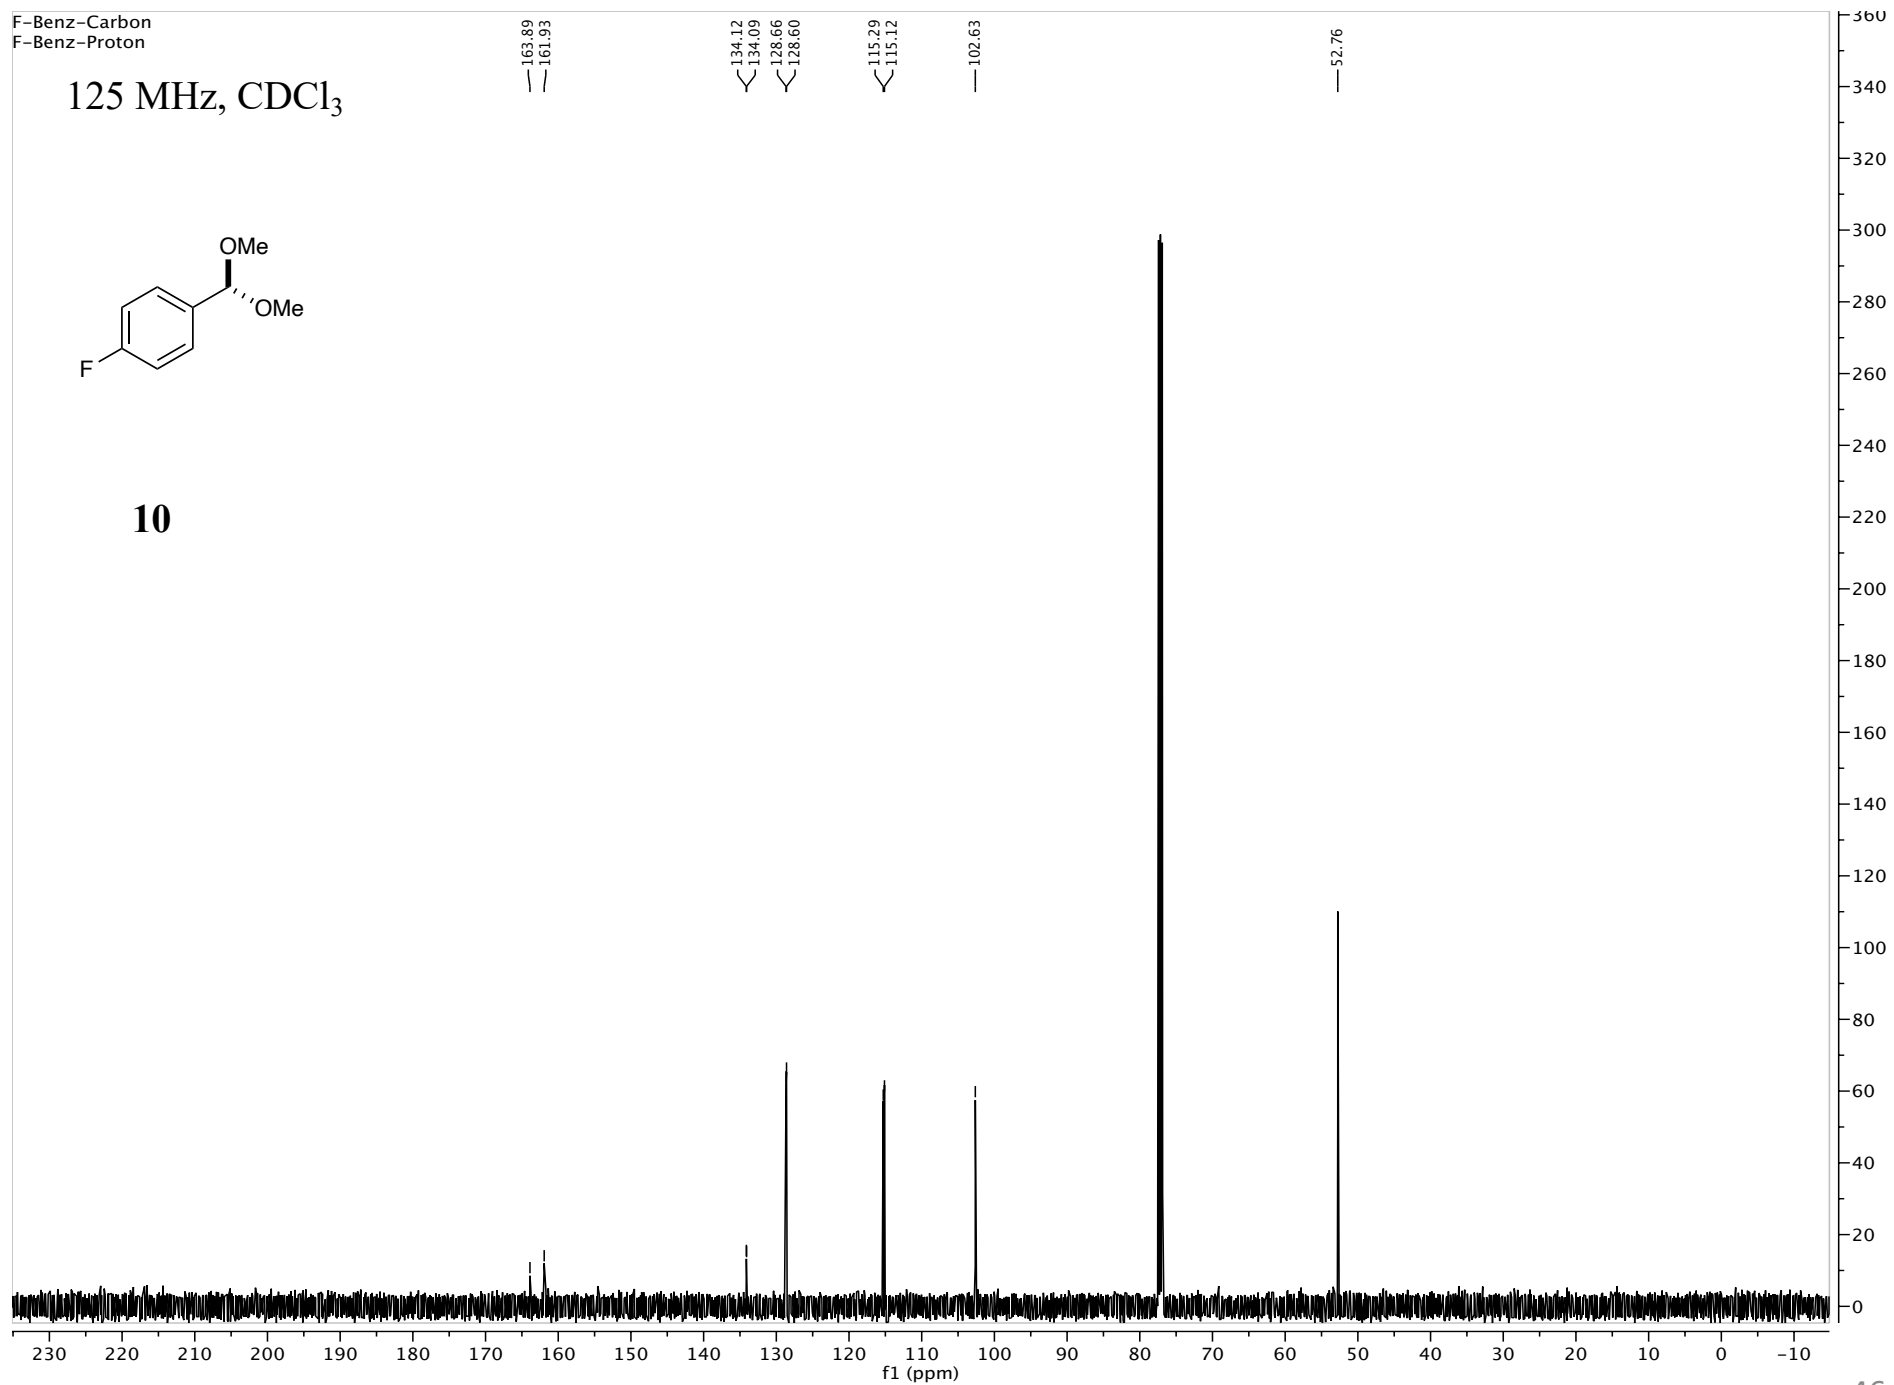

500 MHz, CDCl<sub>3</sub>

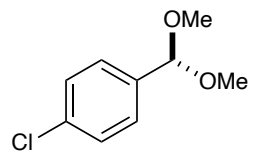

**11**

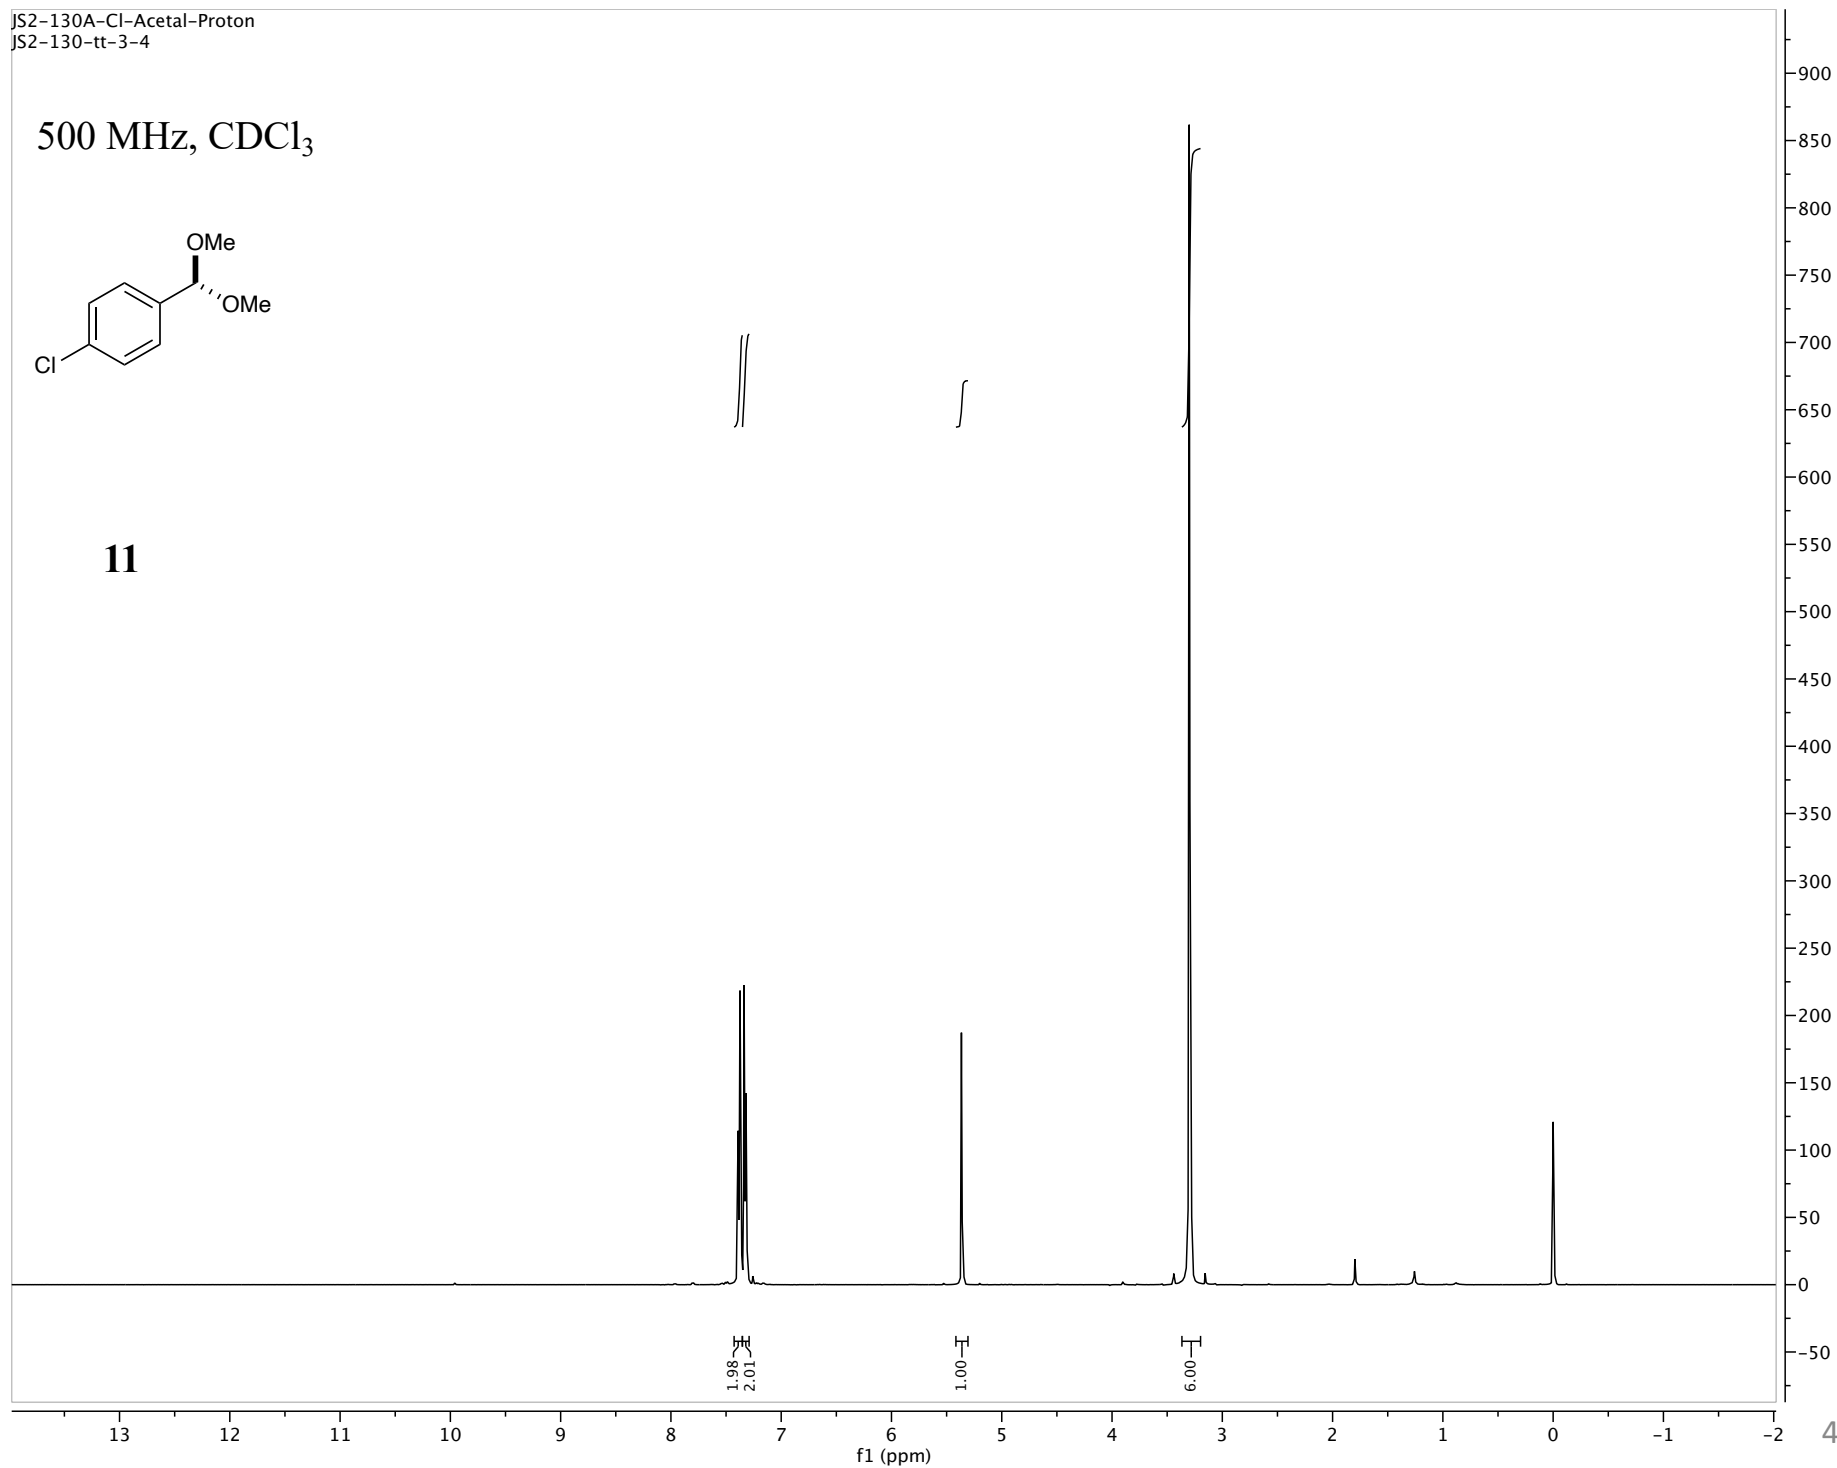

— 136.  
— 134.  
— 128.  
— 128.

— 102.

— 52.6

125 MHz, CDCl<sub>3</sub>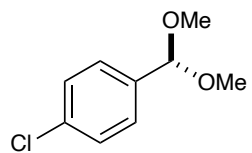**11**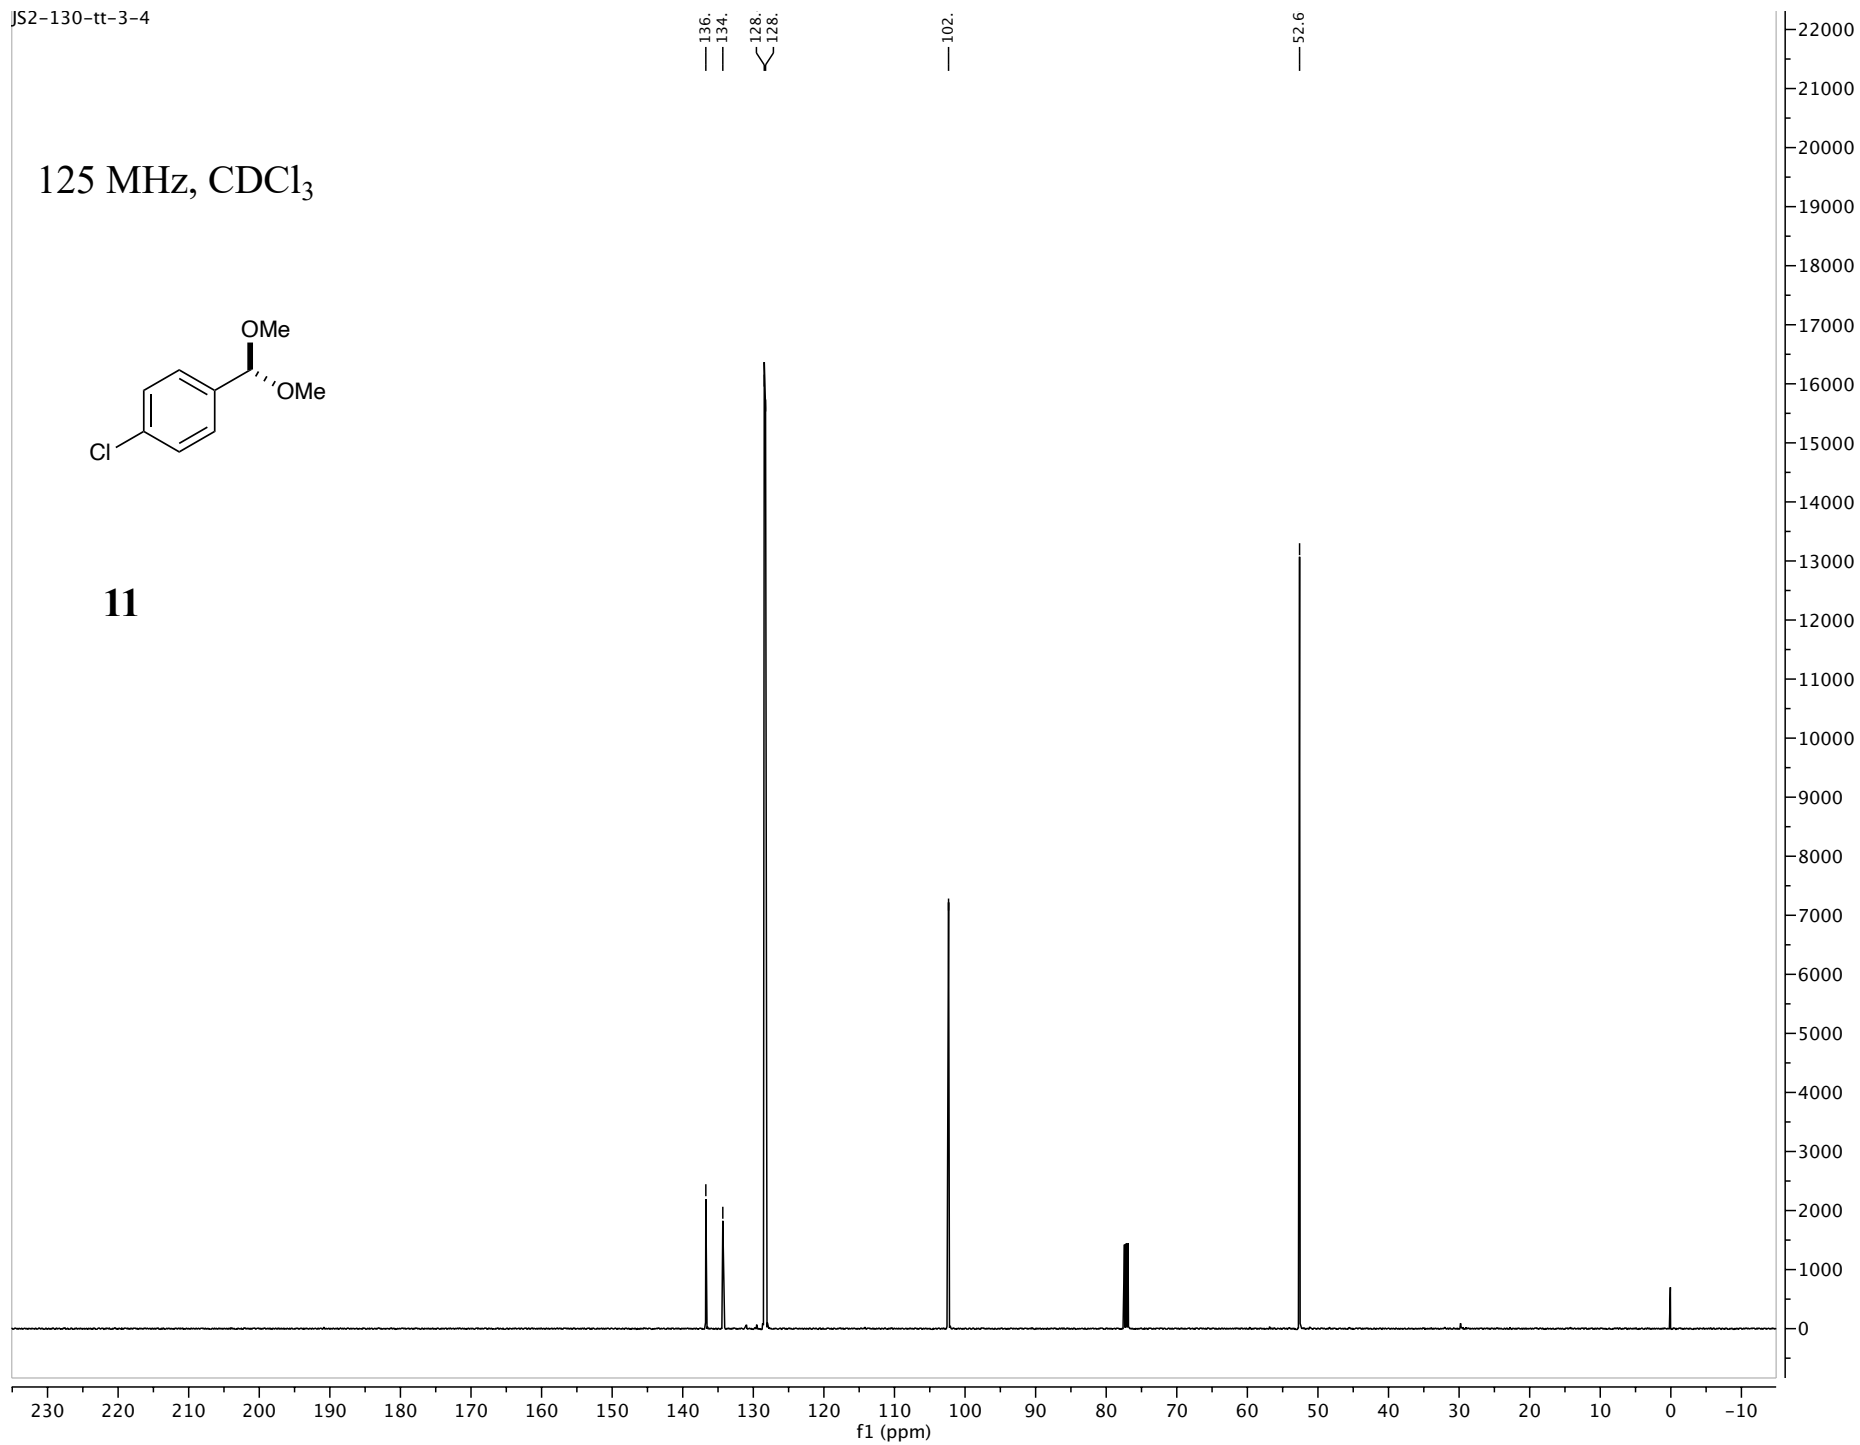



500 MHz, CDCl<sub>3</sub>

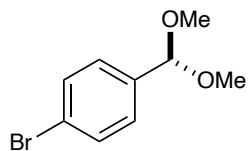

12

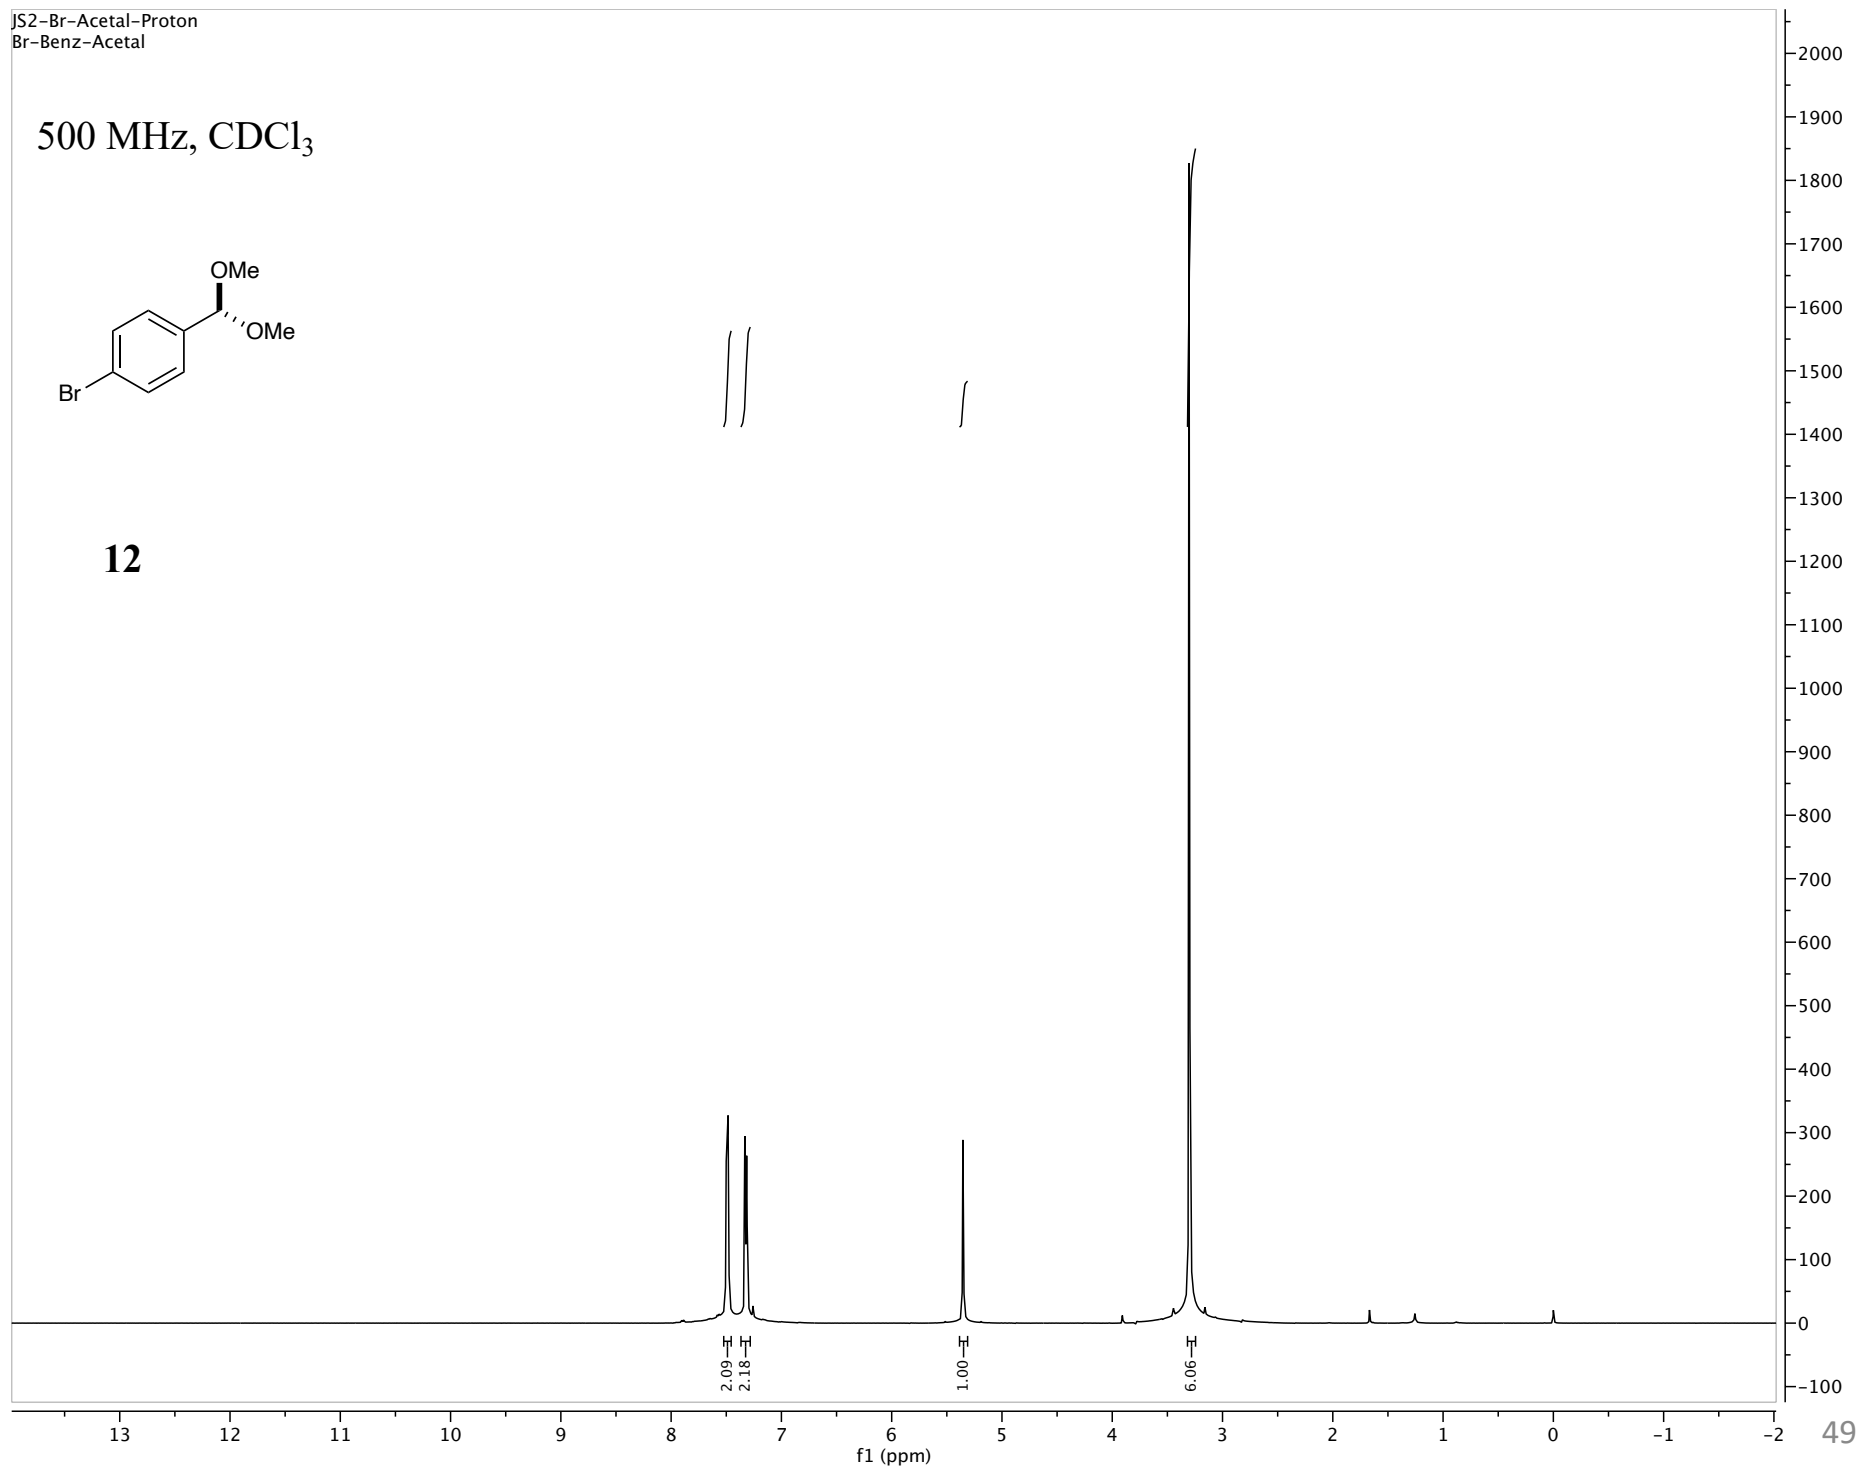

JS2-Br-Acetal-Carbon  
Br-Benz-Acetal

125 MHz, CDCl<sub>3</sub>

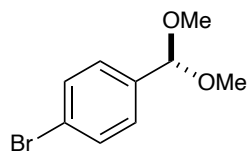

12

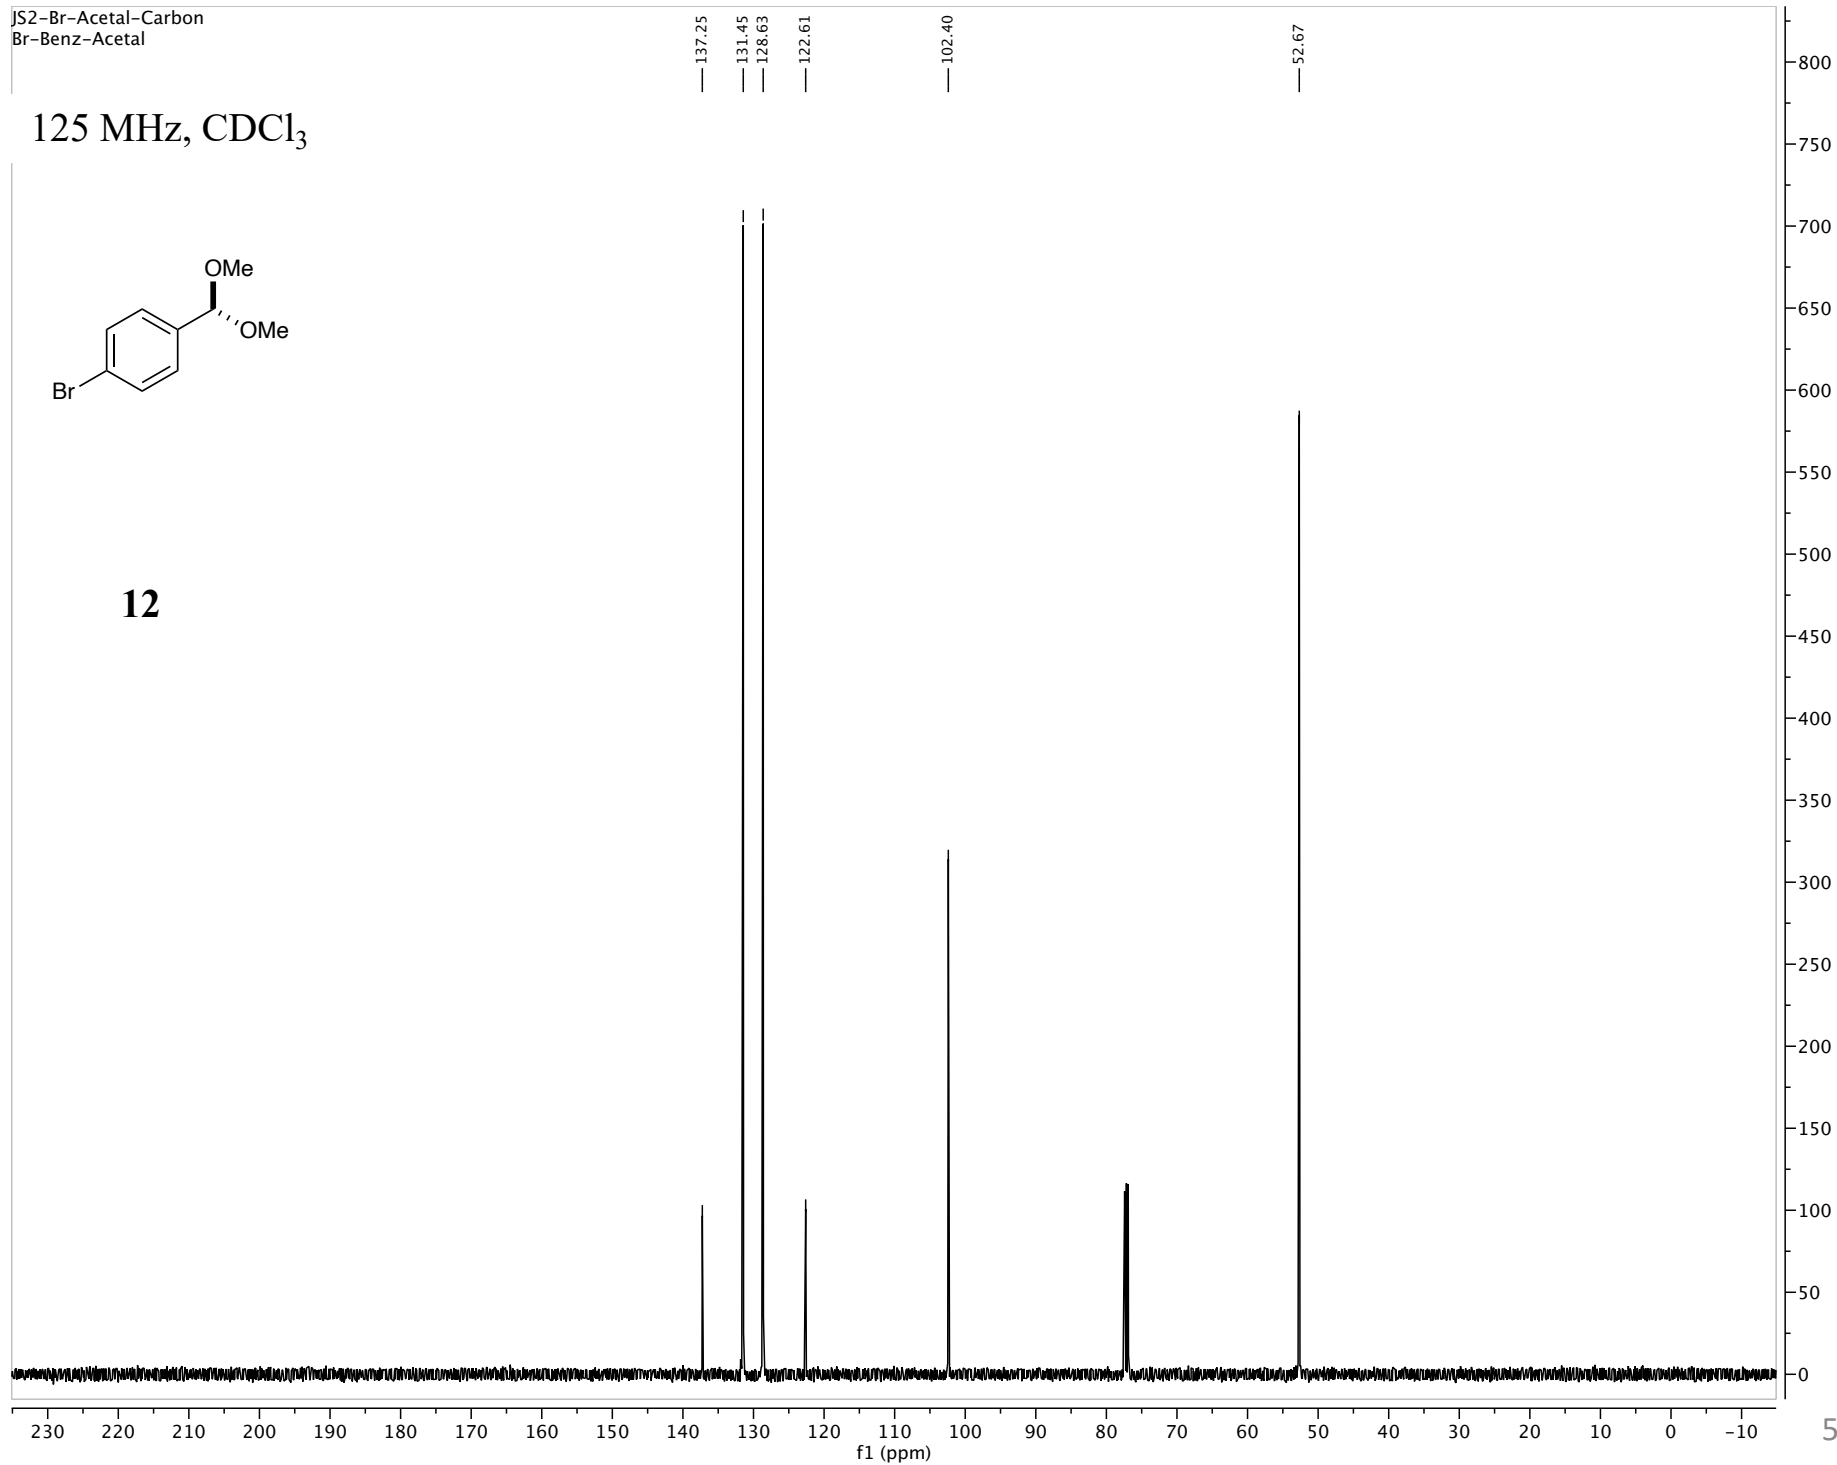

TFB-Acetal  
TFB

500 MHz, CDCl<sub>3</sub>

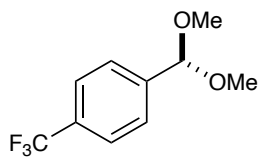

**13**

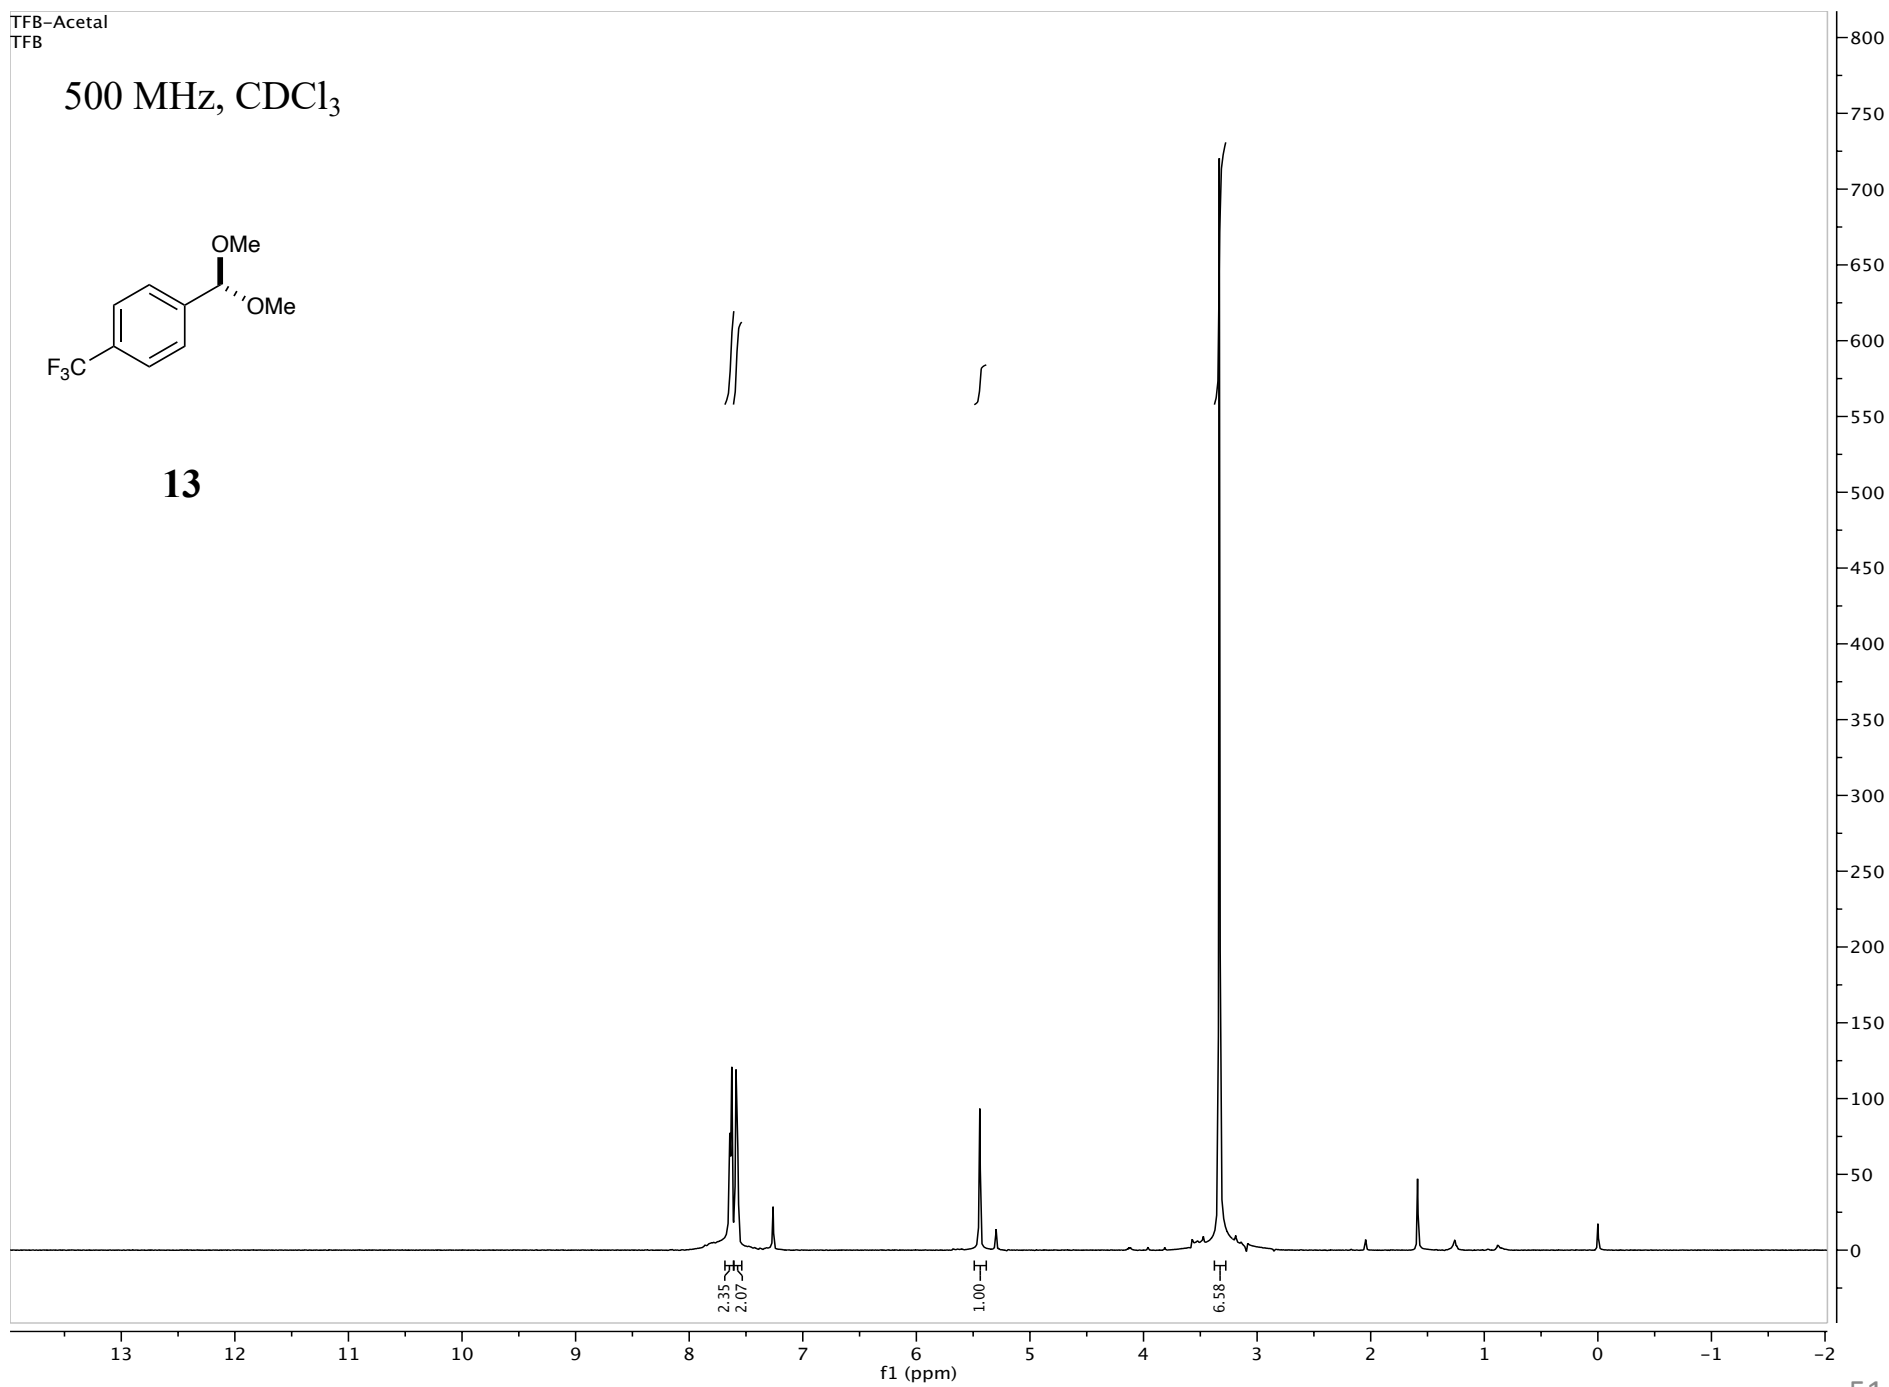

500 MHz, CDCl<sub>3</sub>

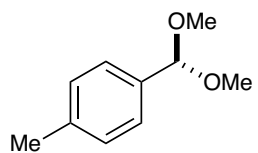

14

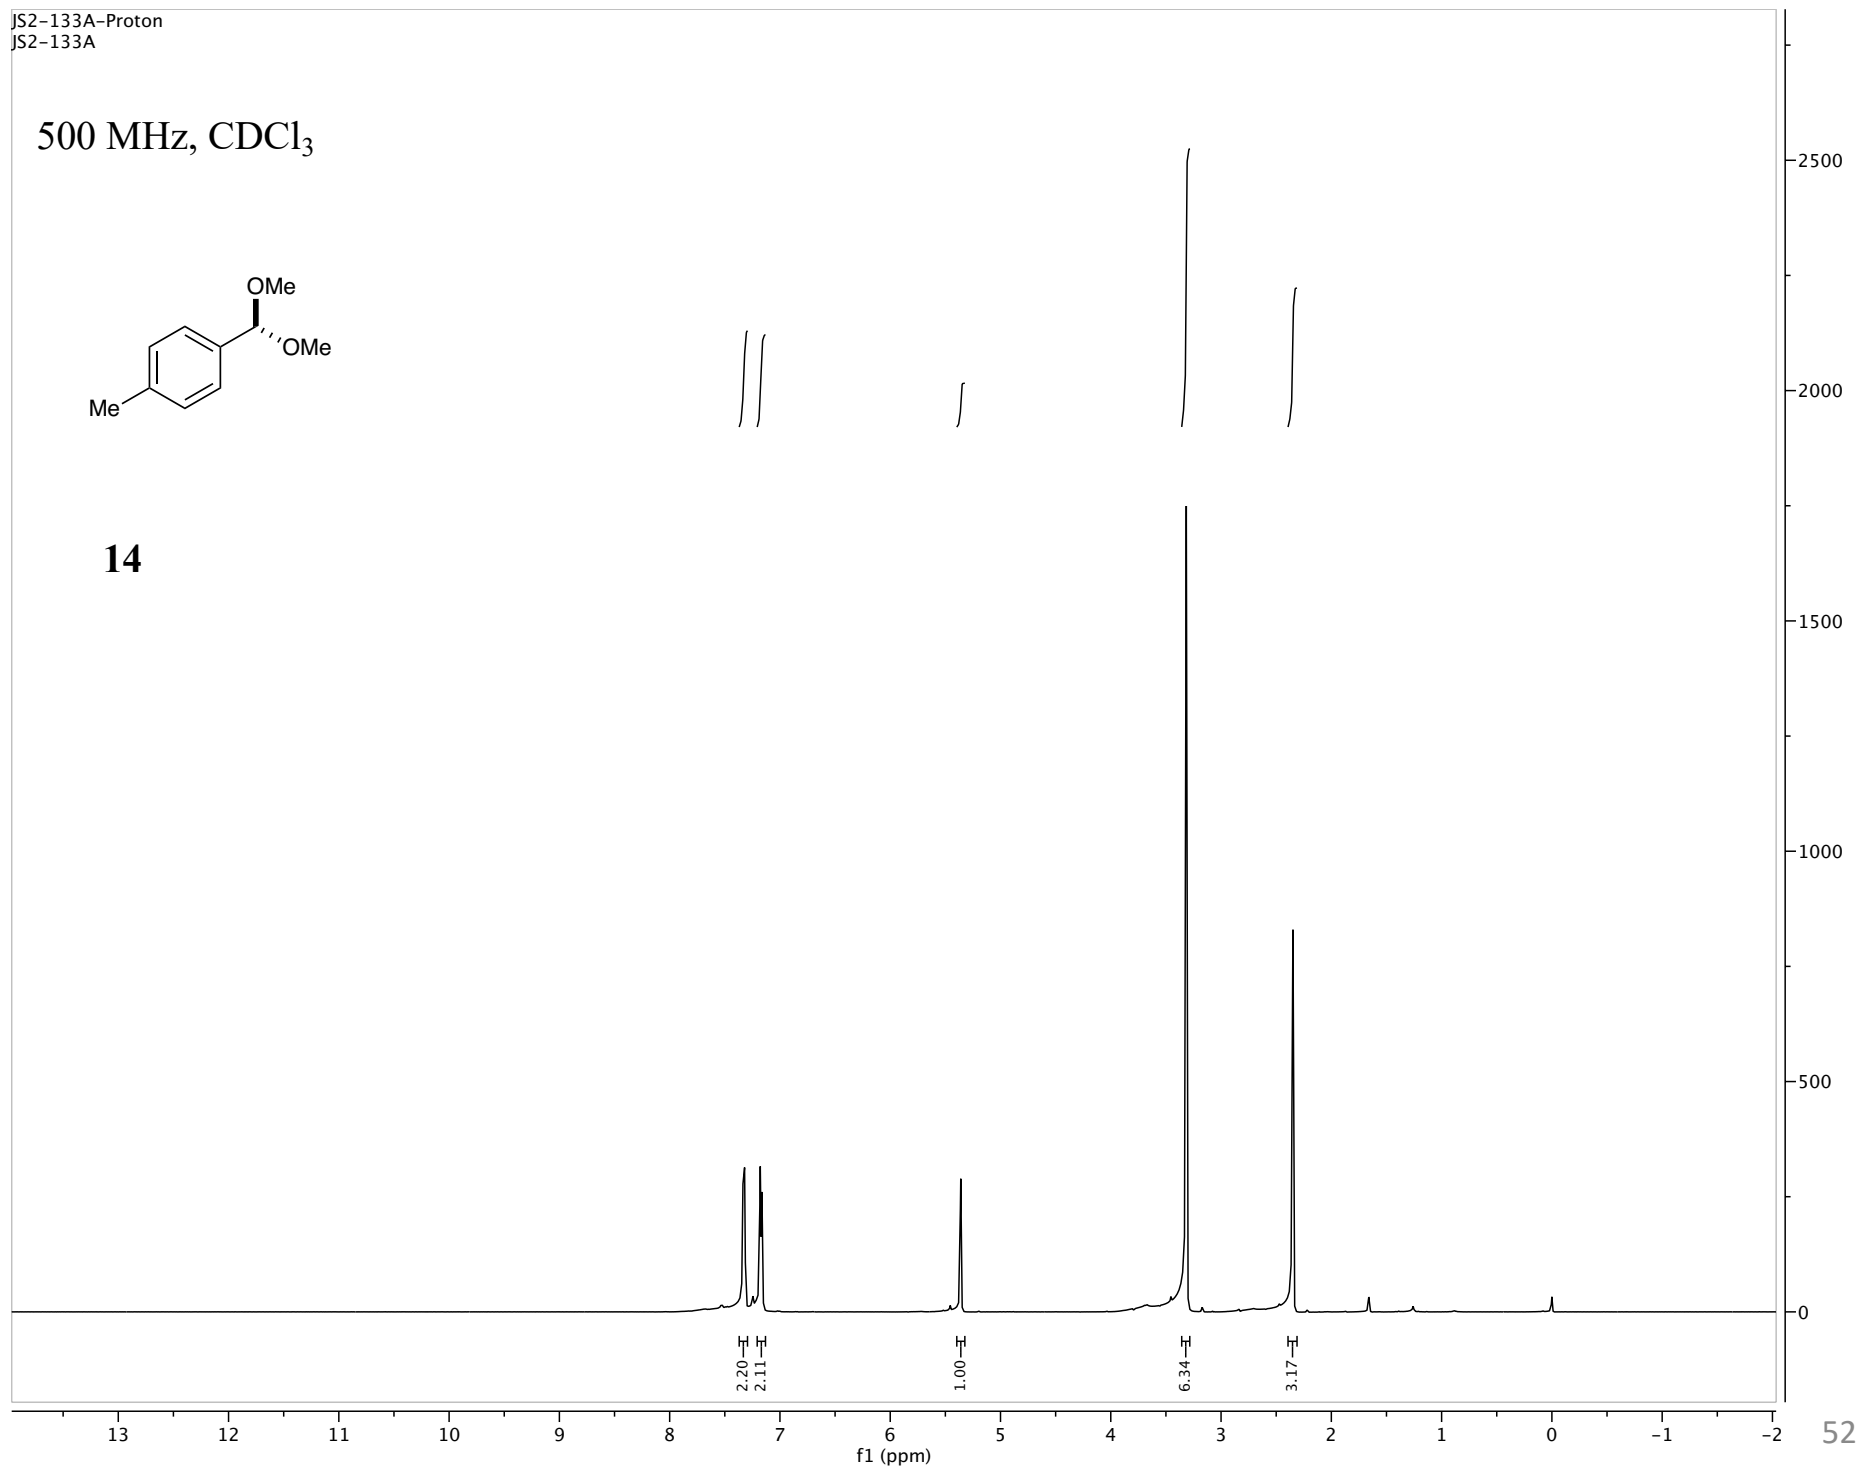

JS2-133A-Carbon  
JS2-133A

125 MHz, CDCl<sub>3</sub>

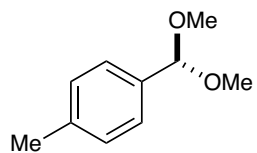

14

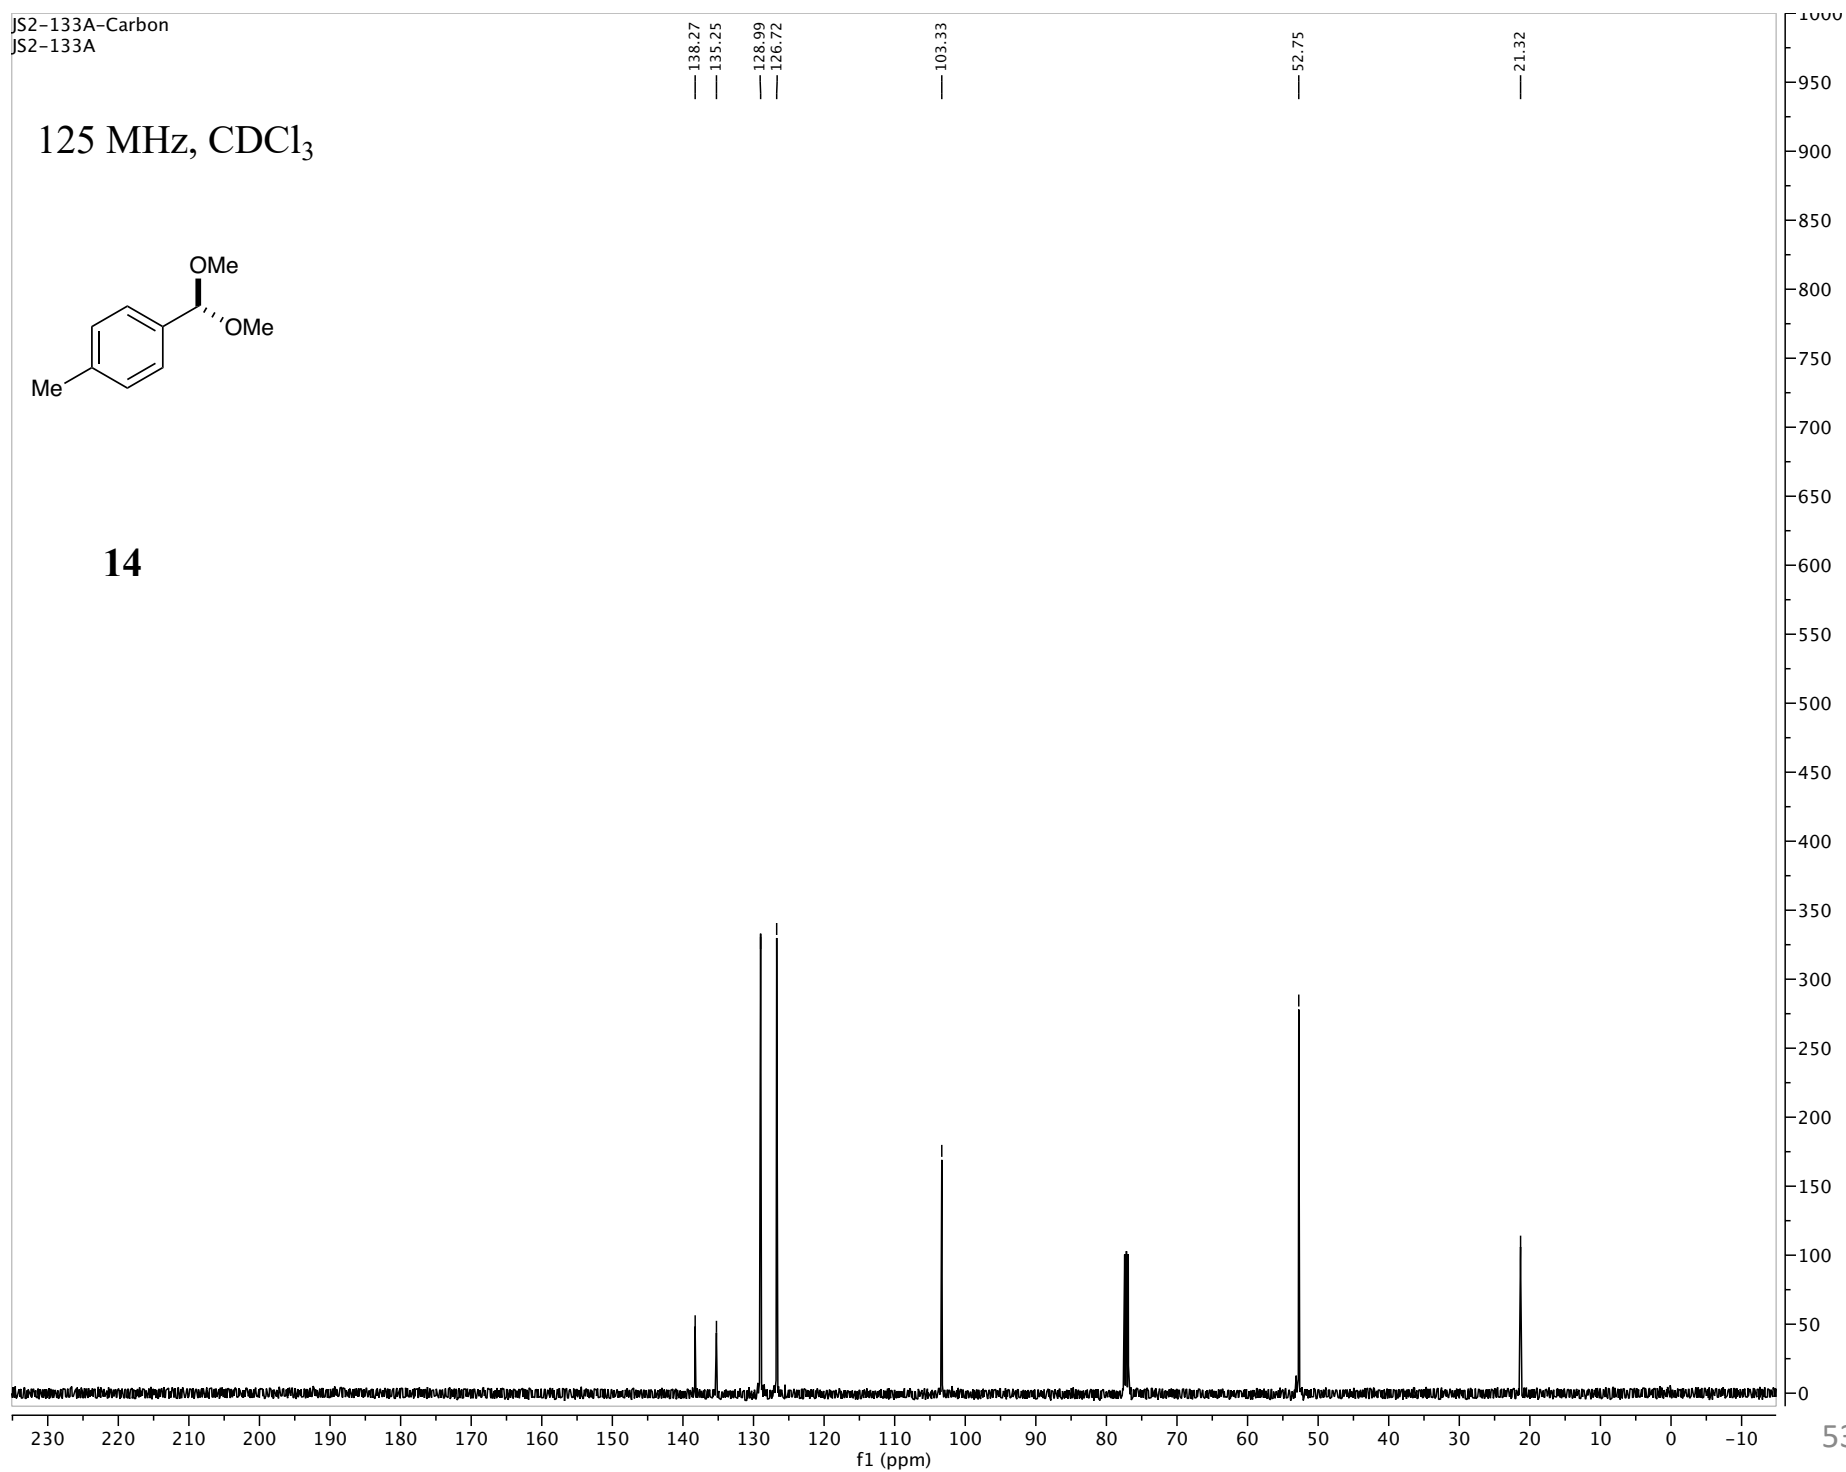

500 MHz, CDCl<sub>3</sub>

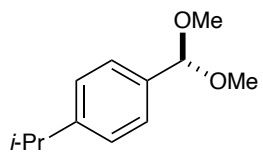

15

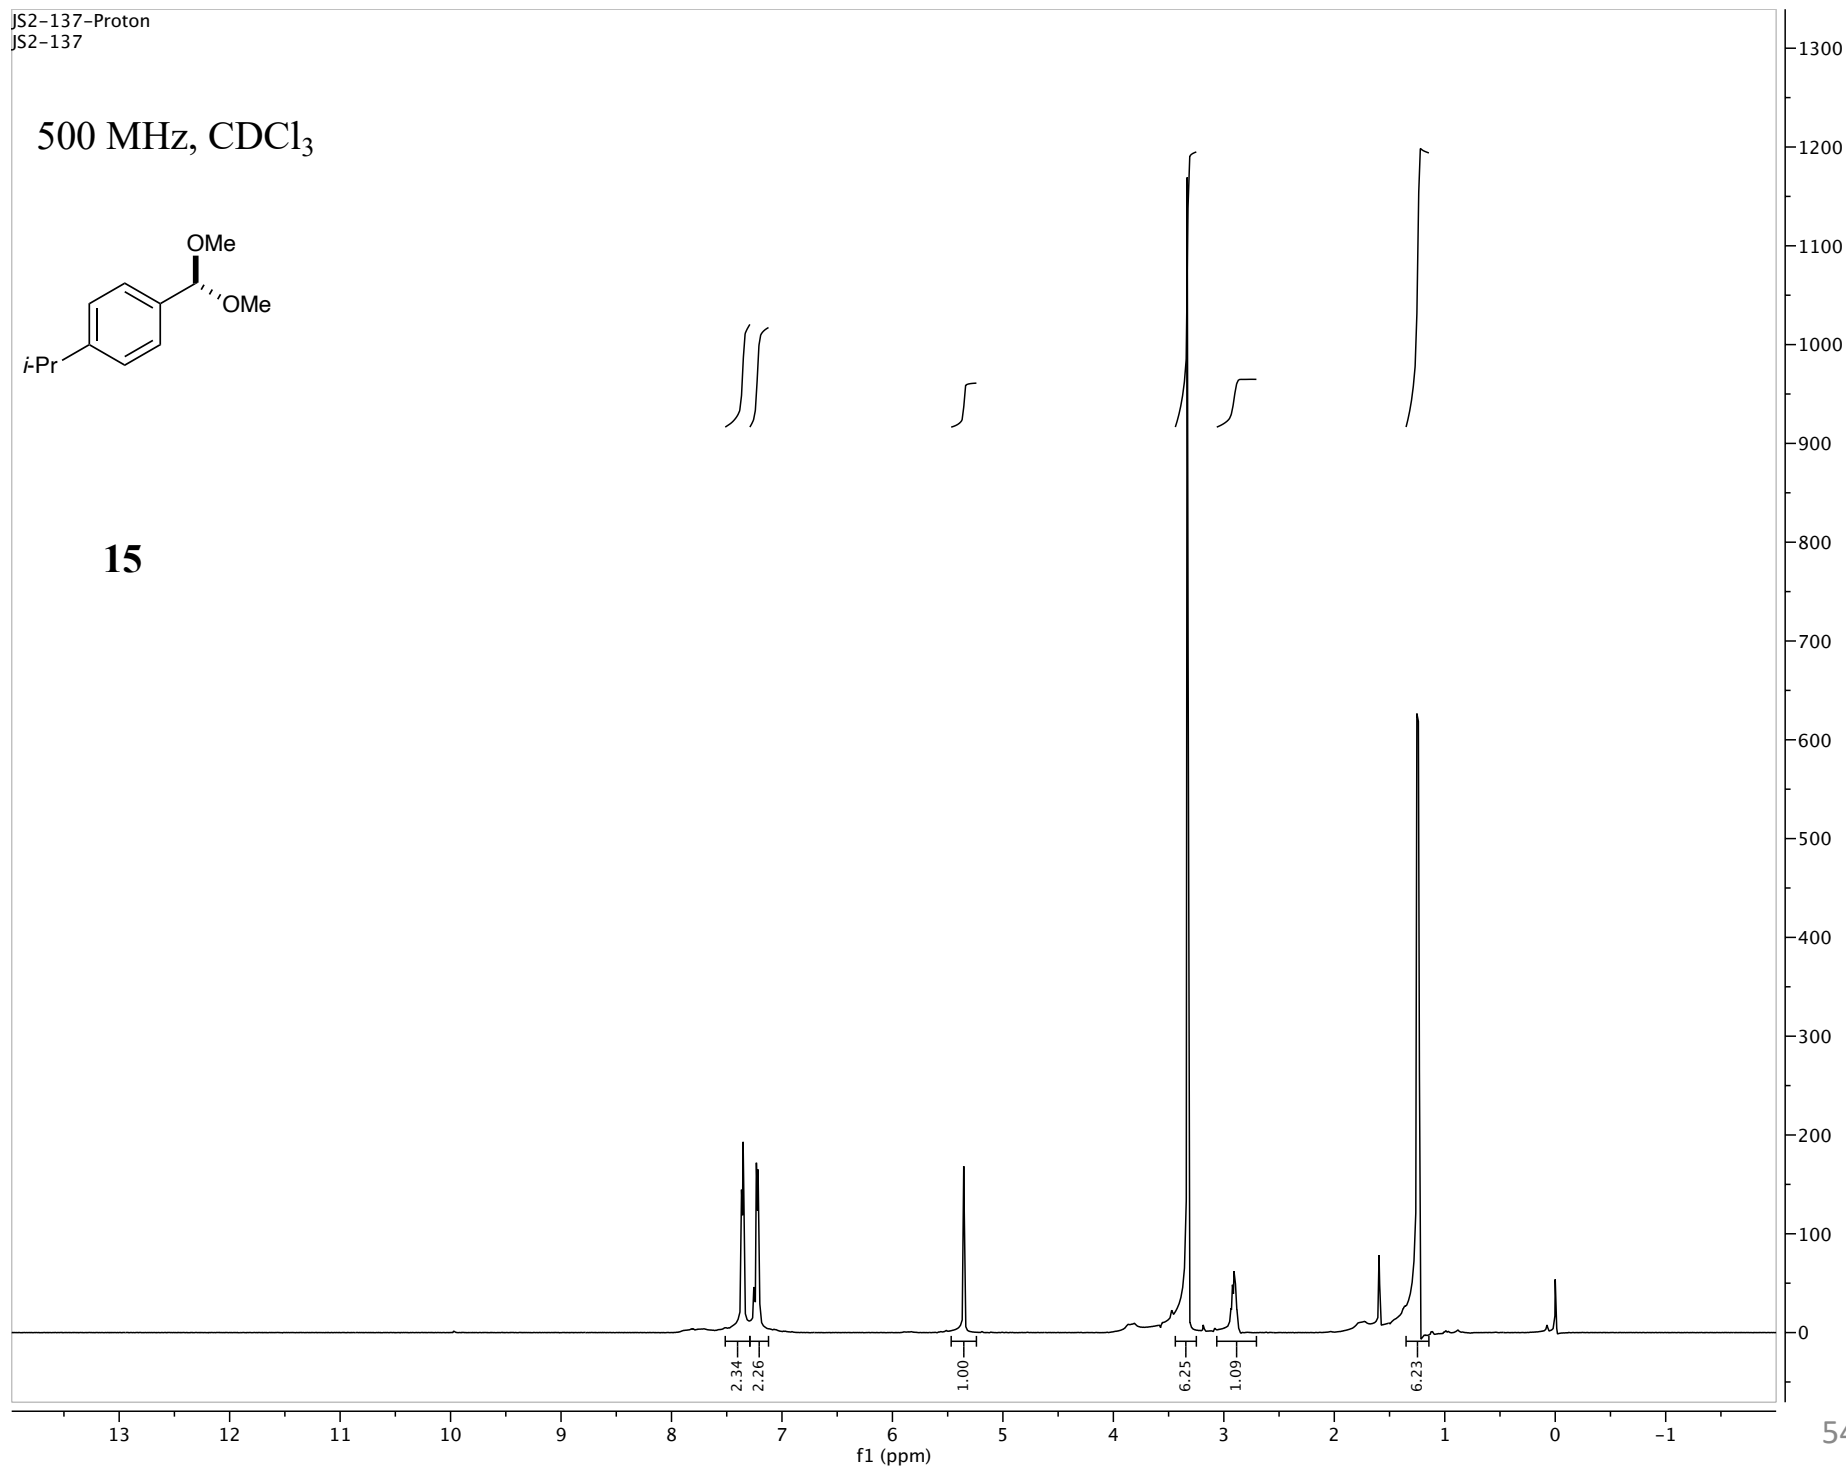

JS2-137-Carbon  
JS2-137

125 MHz, CDCl<sub>3</sub>

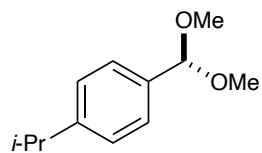

15

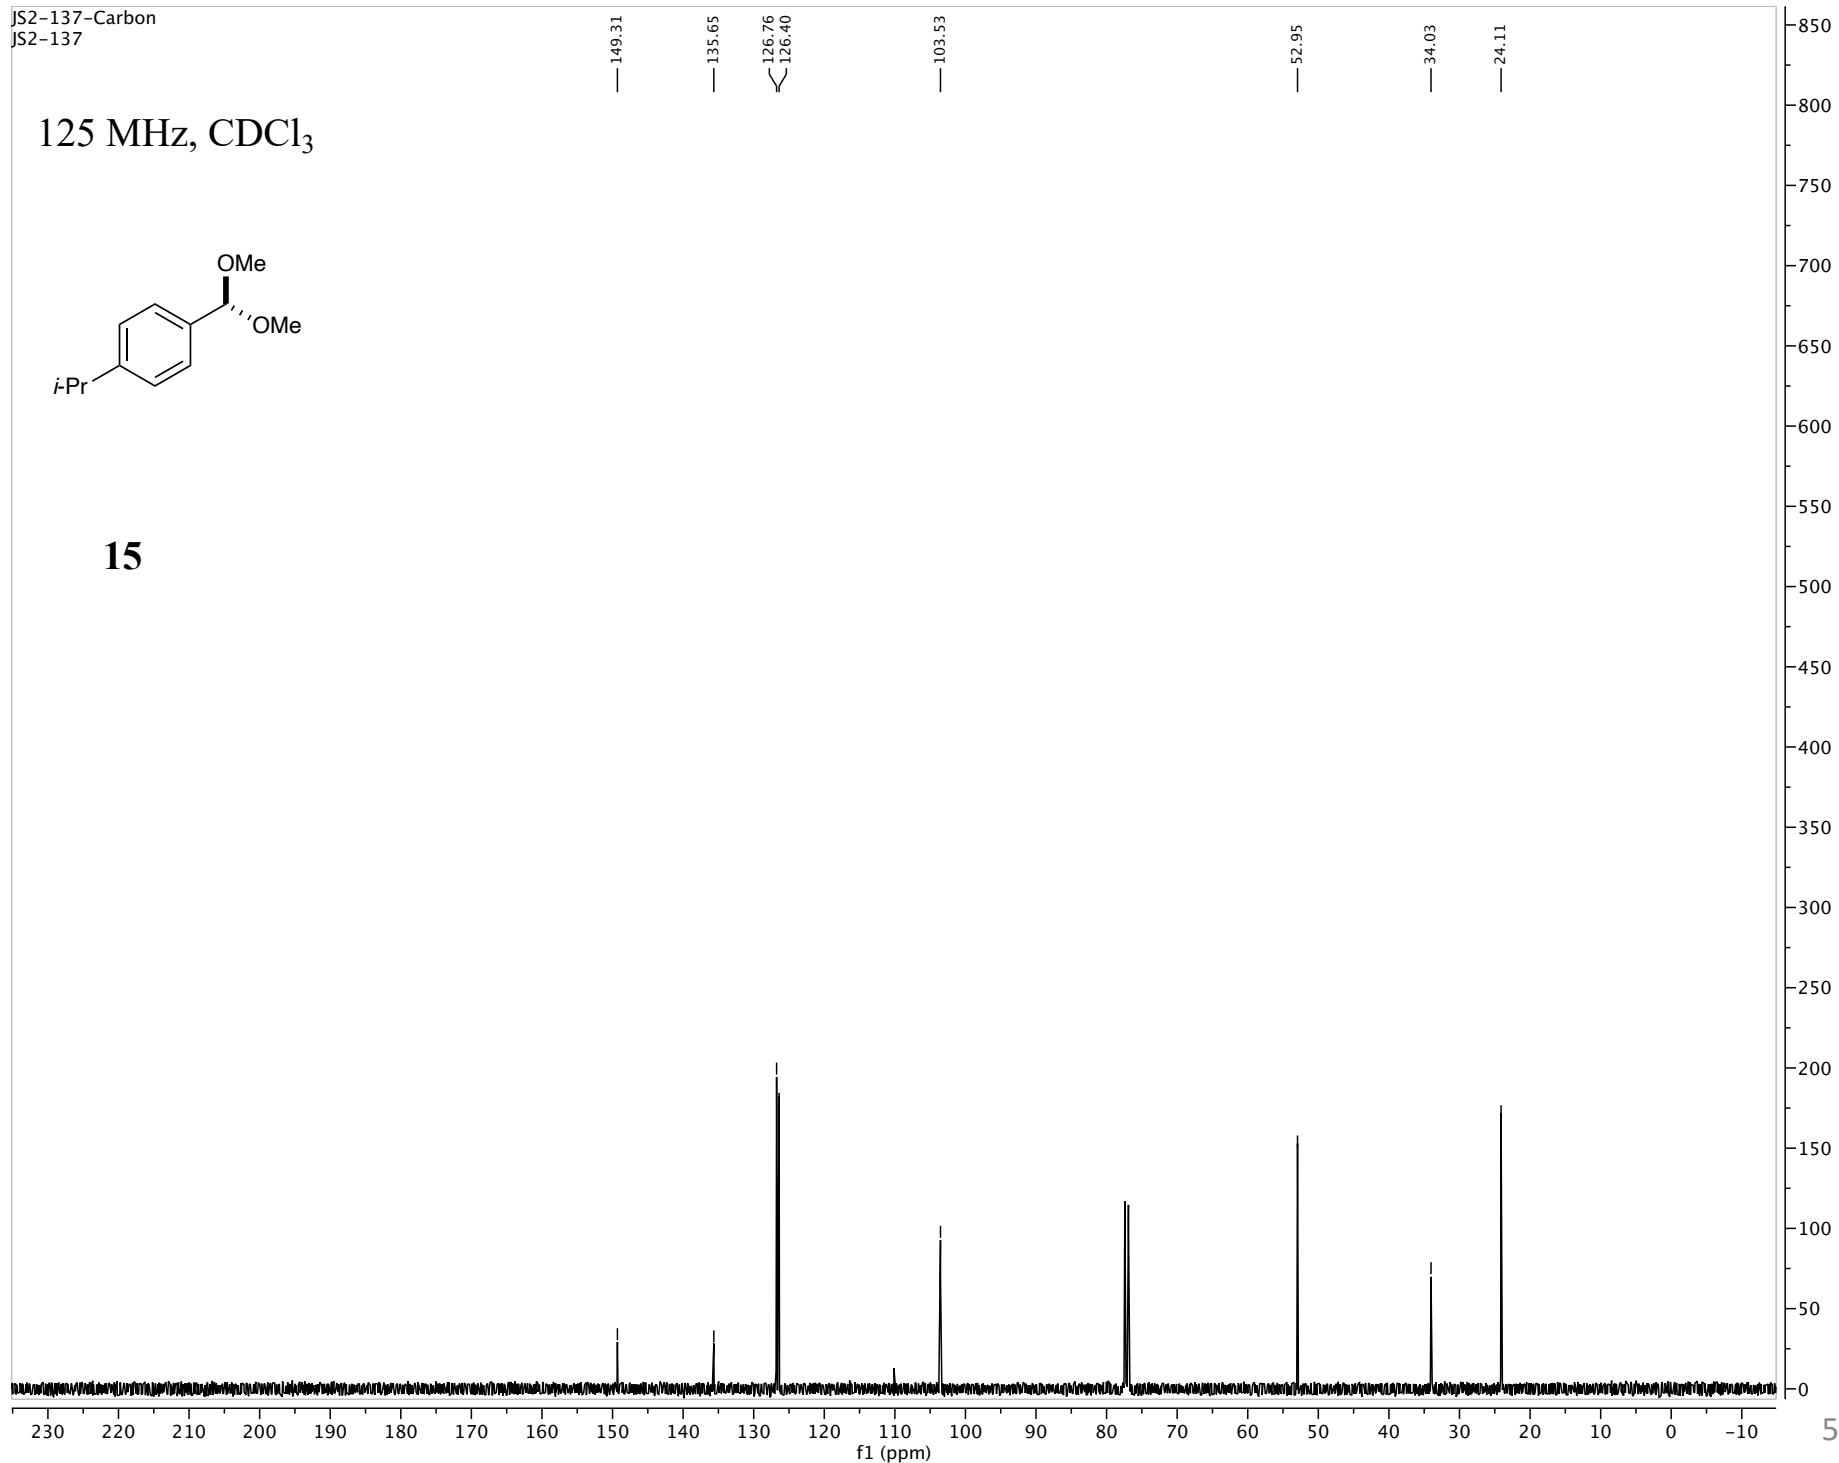

JS2-133B-Proton  
JS2-133B

500 MHz, CDCl<sub>3</sub>

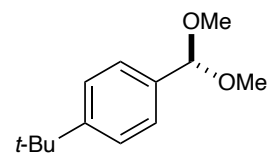

16

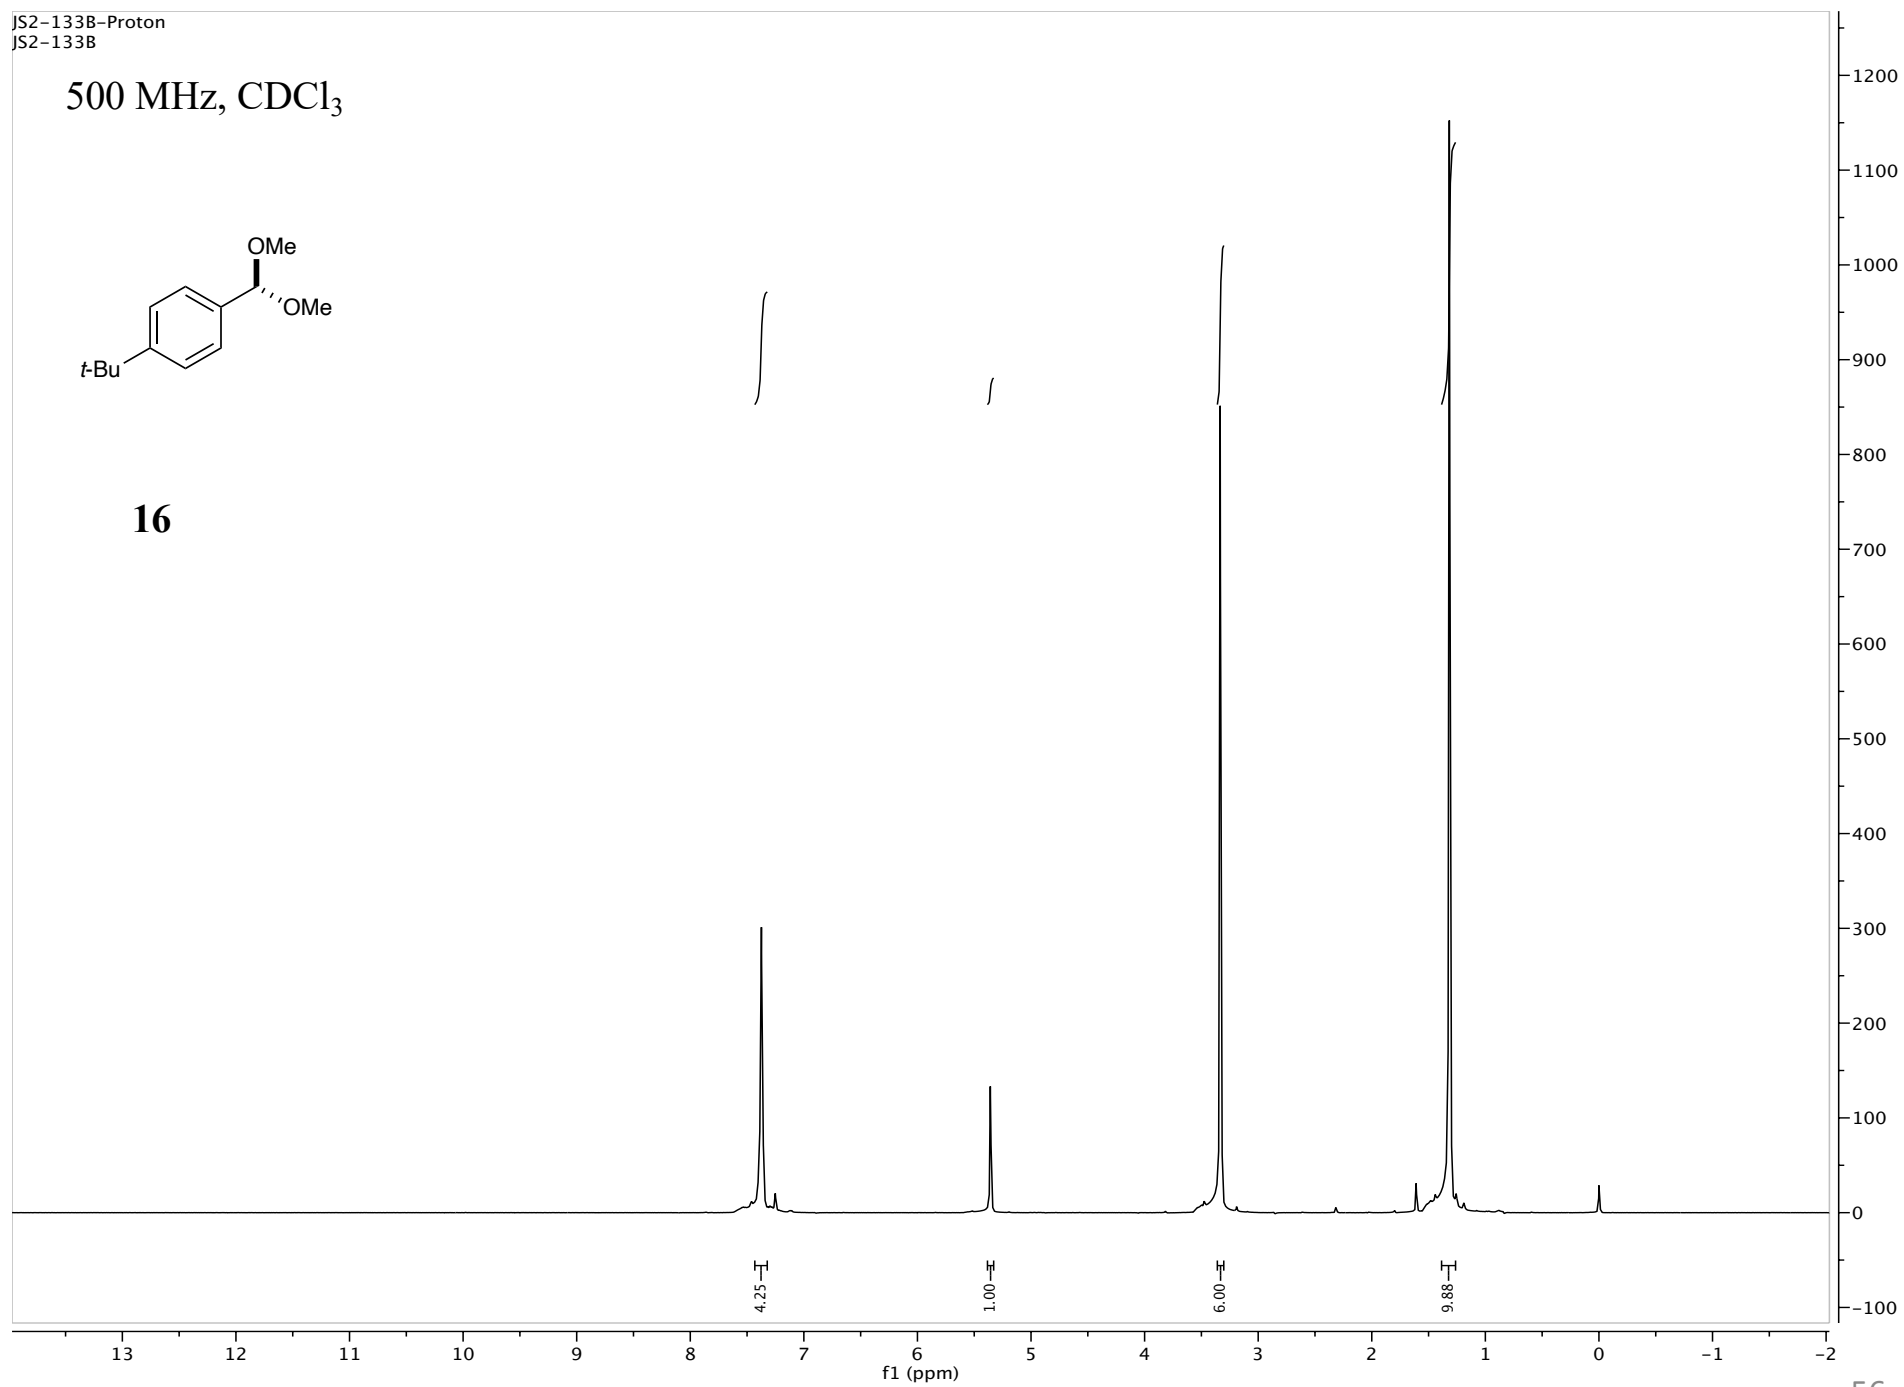



JS2-133B-Carbon  
JS2-133B

125 MHz, CDCl<sub>3</sub>

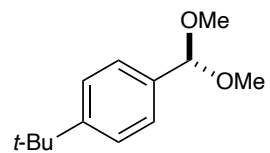

16

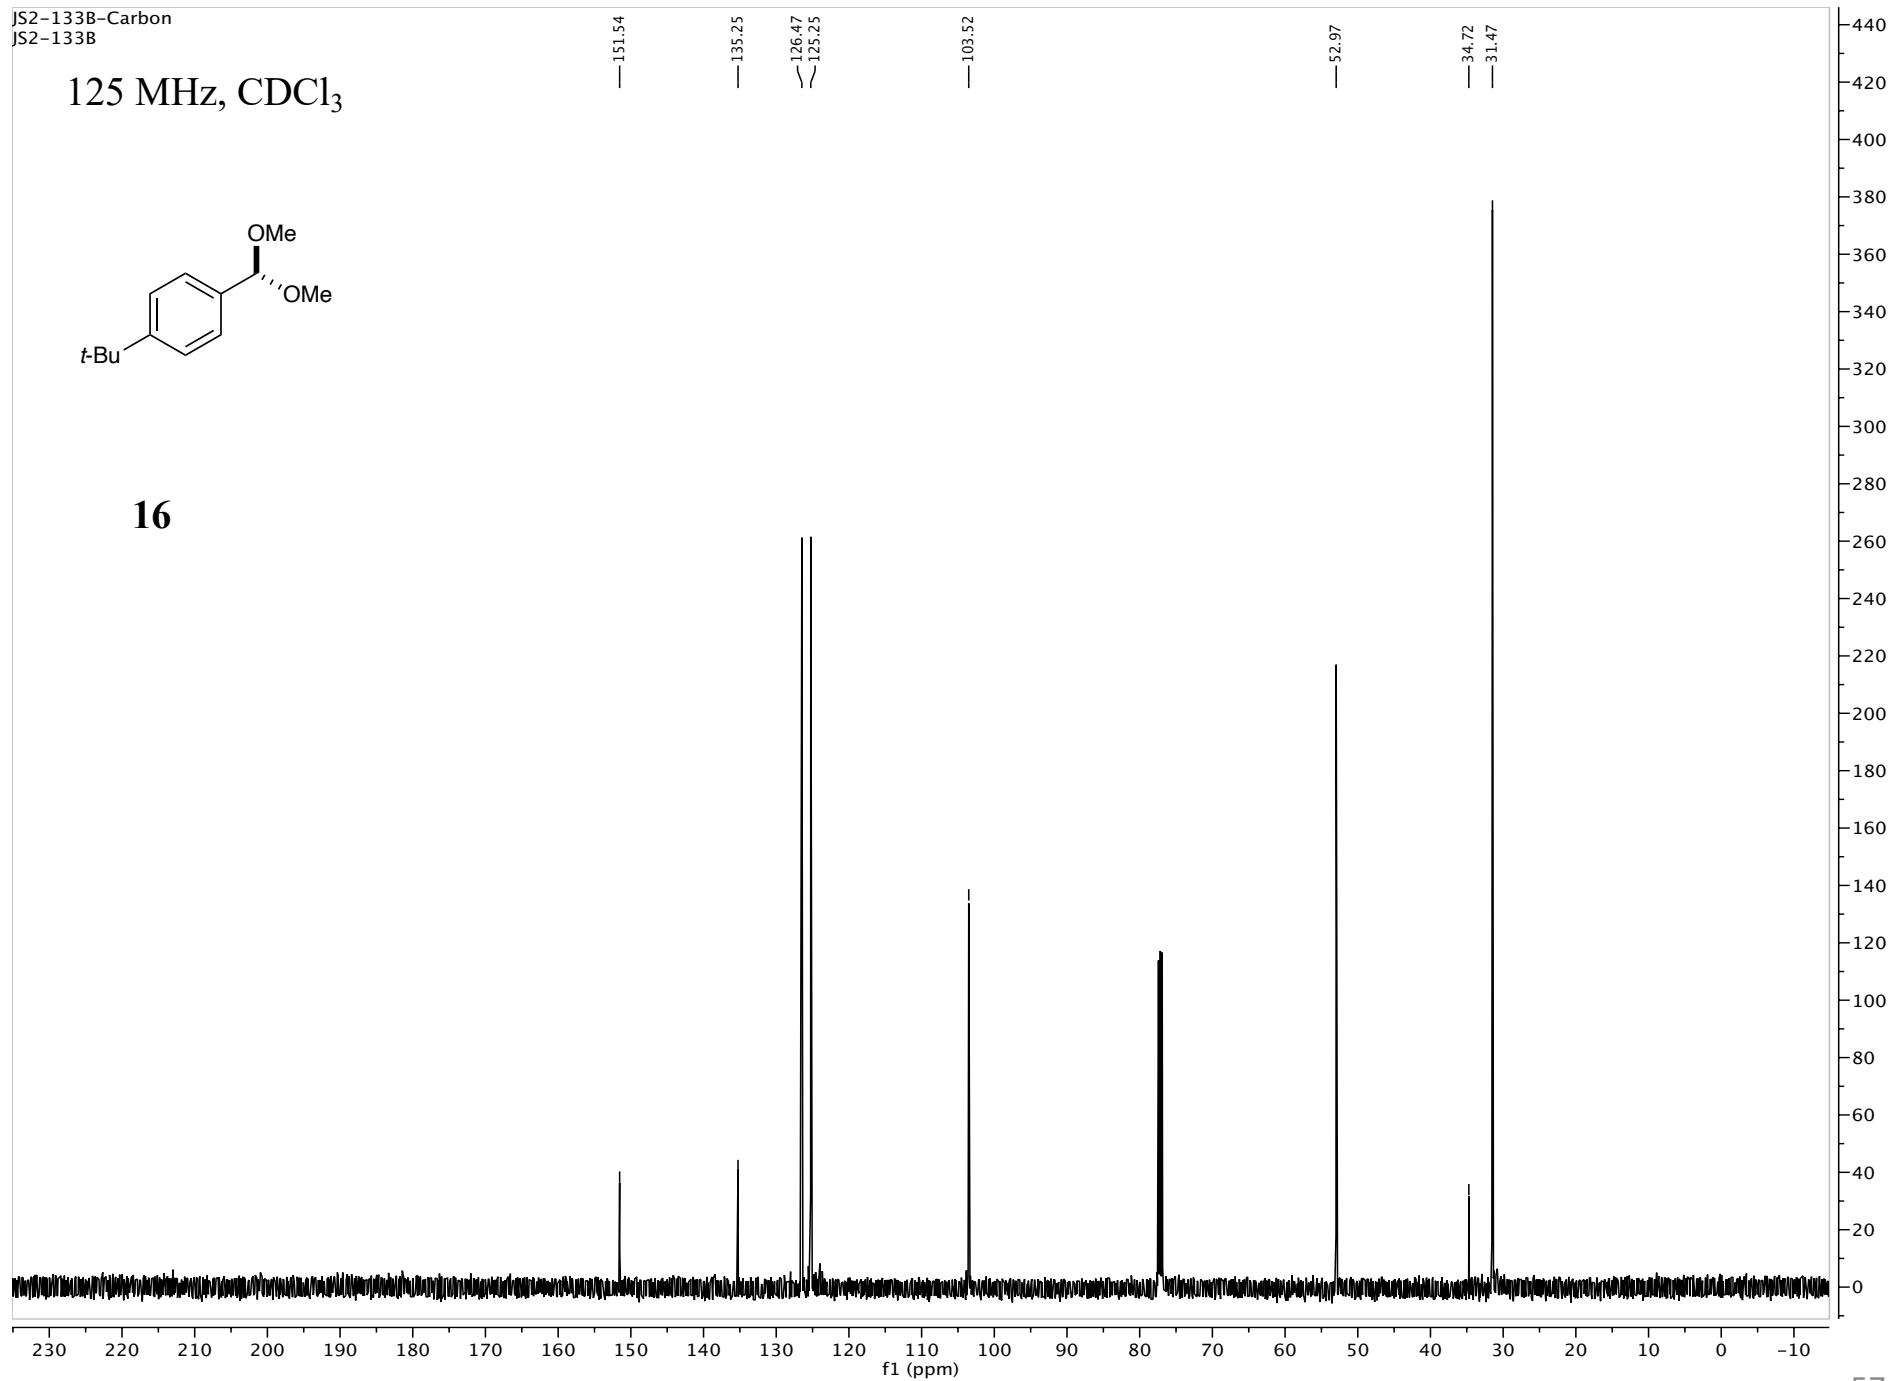

500 MHz, CDCl<sub>3</sub>

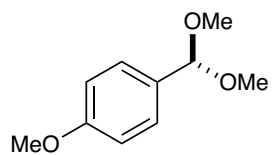

17

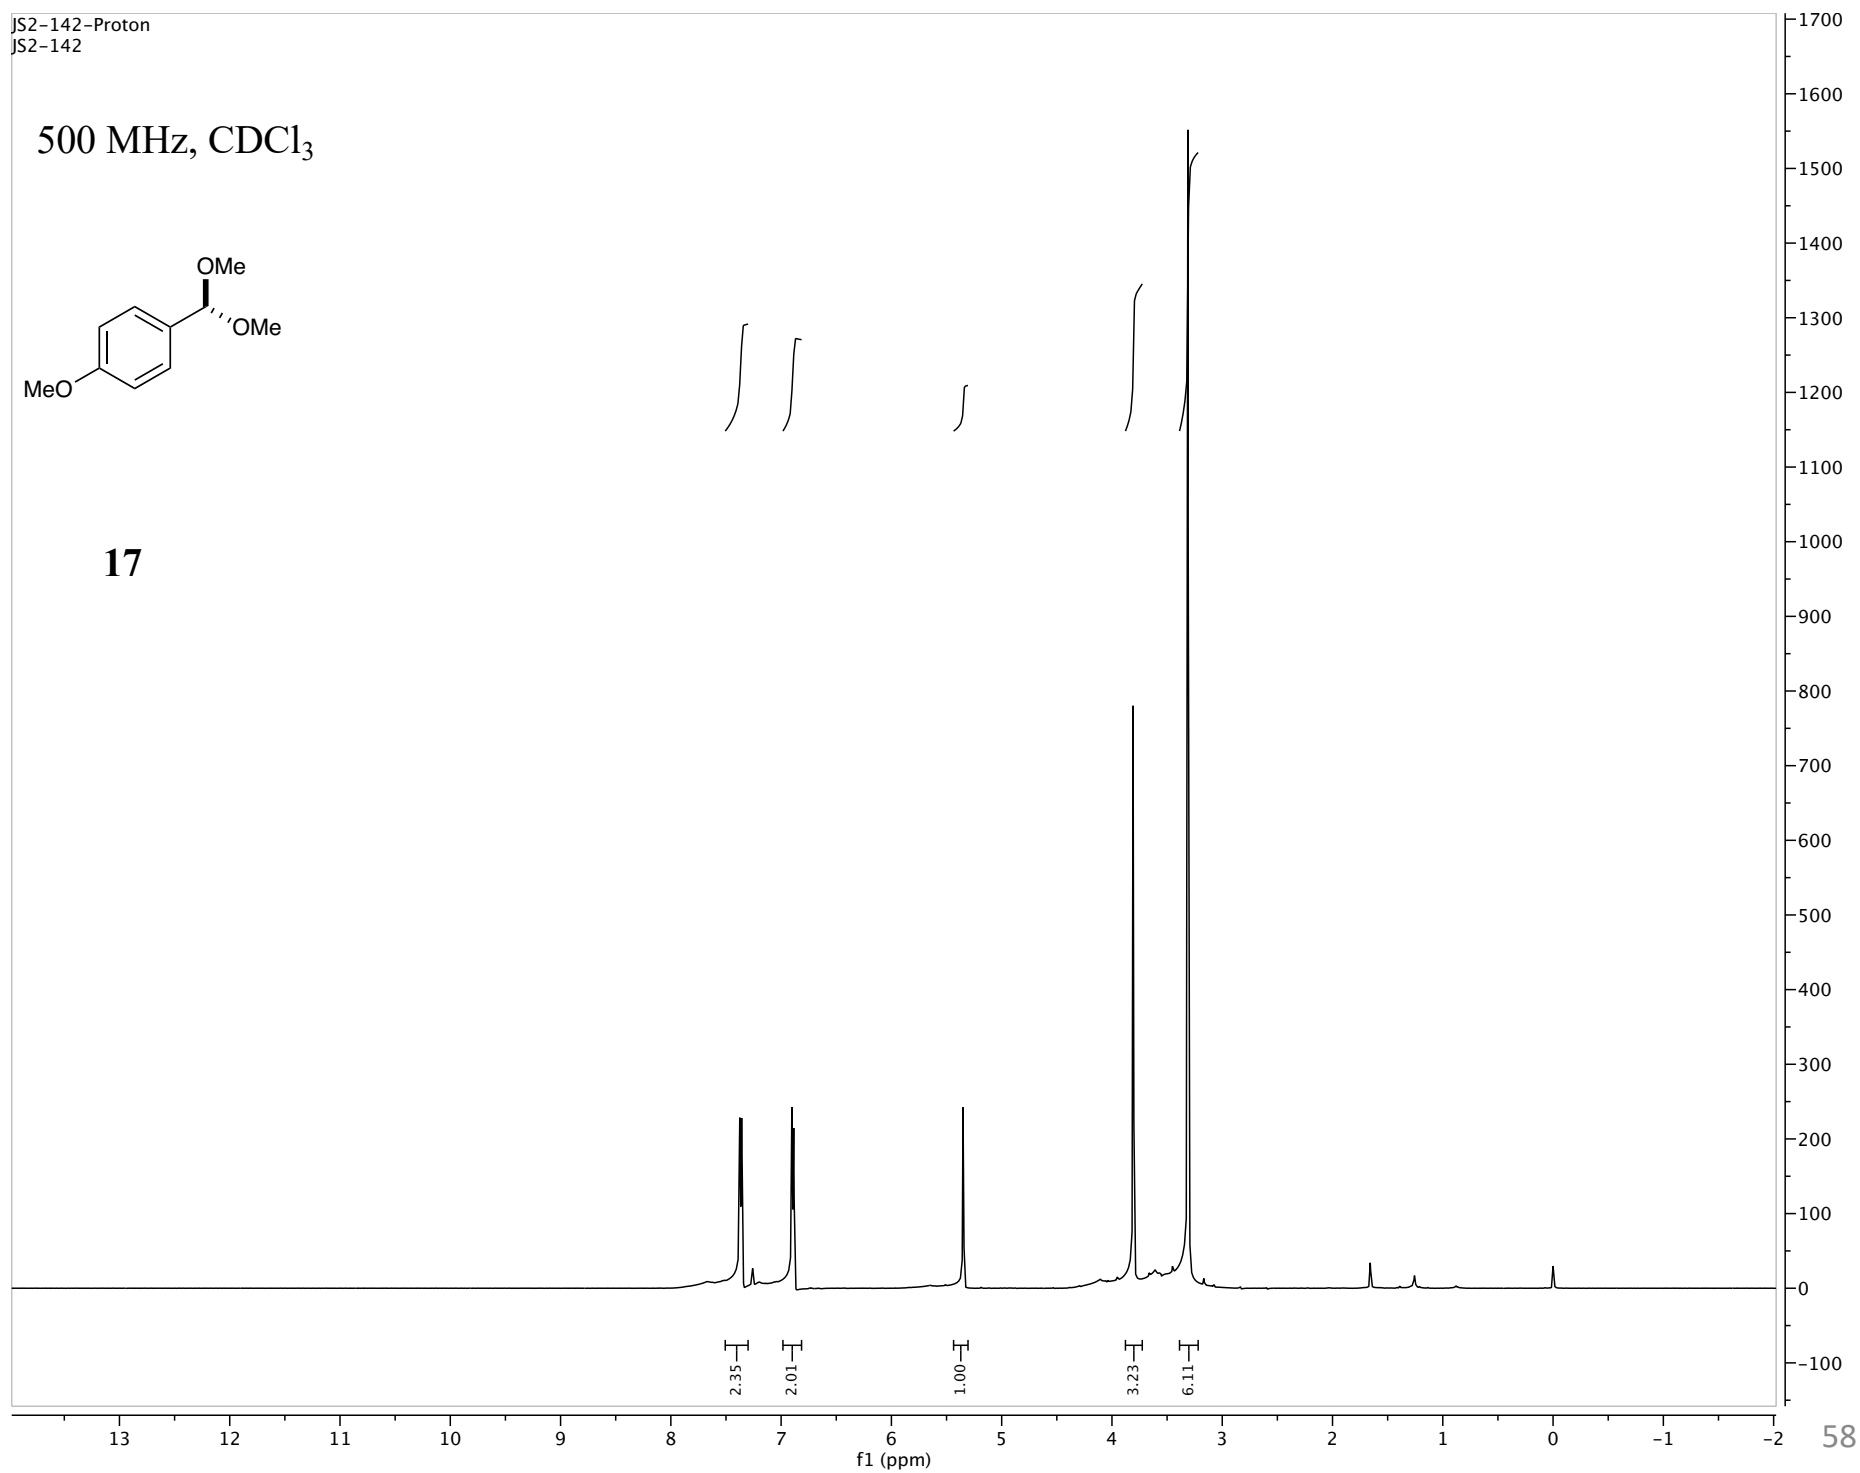

JS2-142-Carbon  
JS2-142

125 MHz, CDCl<sub>3</sub>

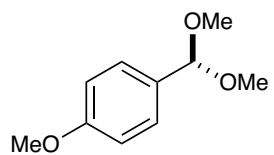

17

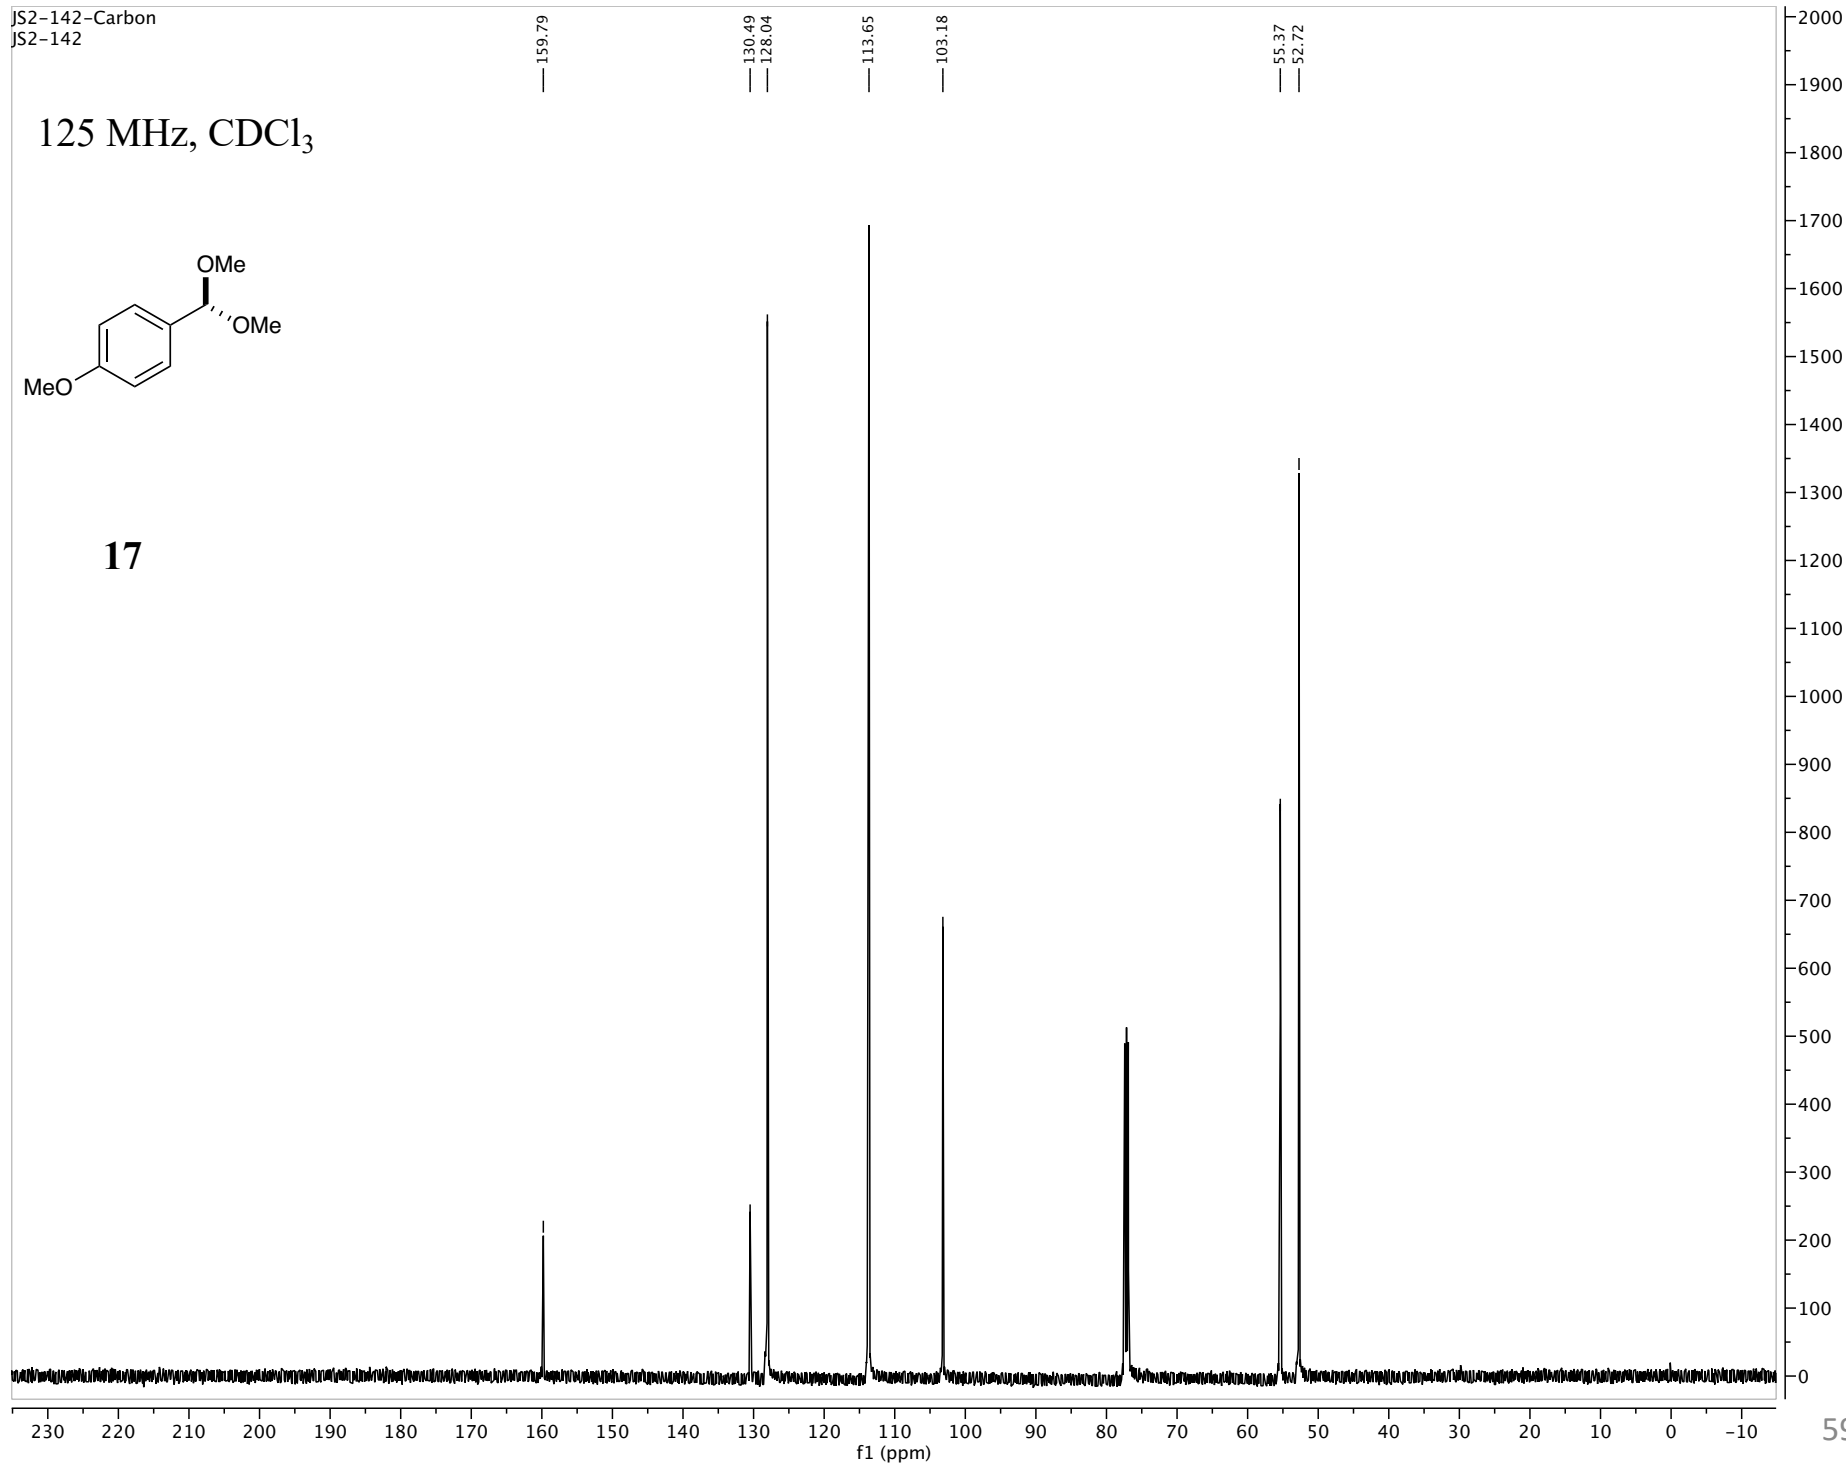

500 MHz, CDCl<sub>3</sub>

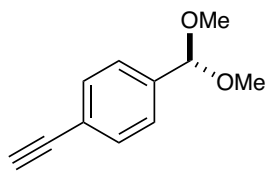

18

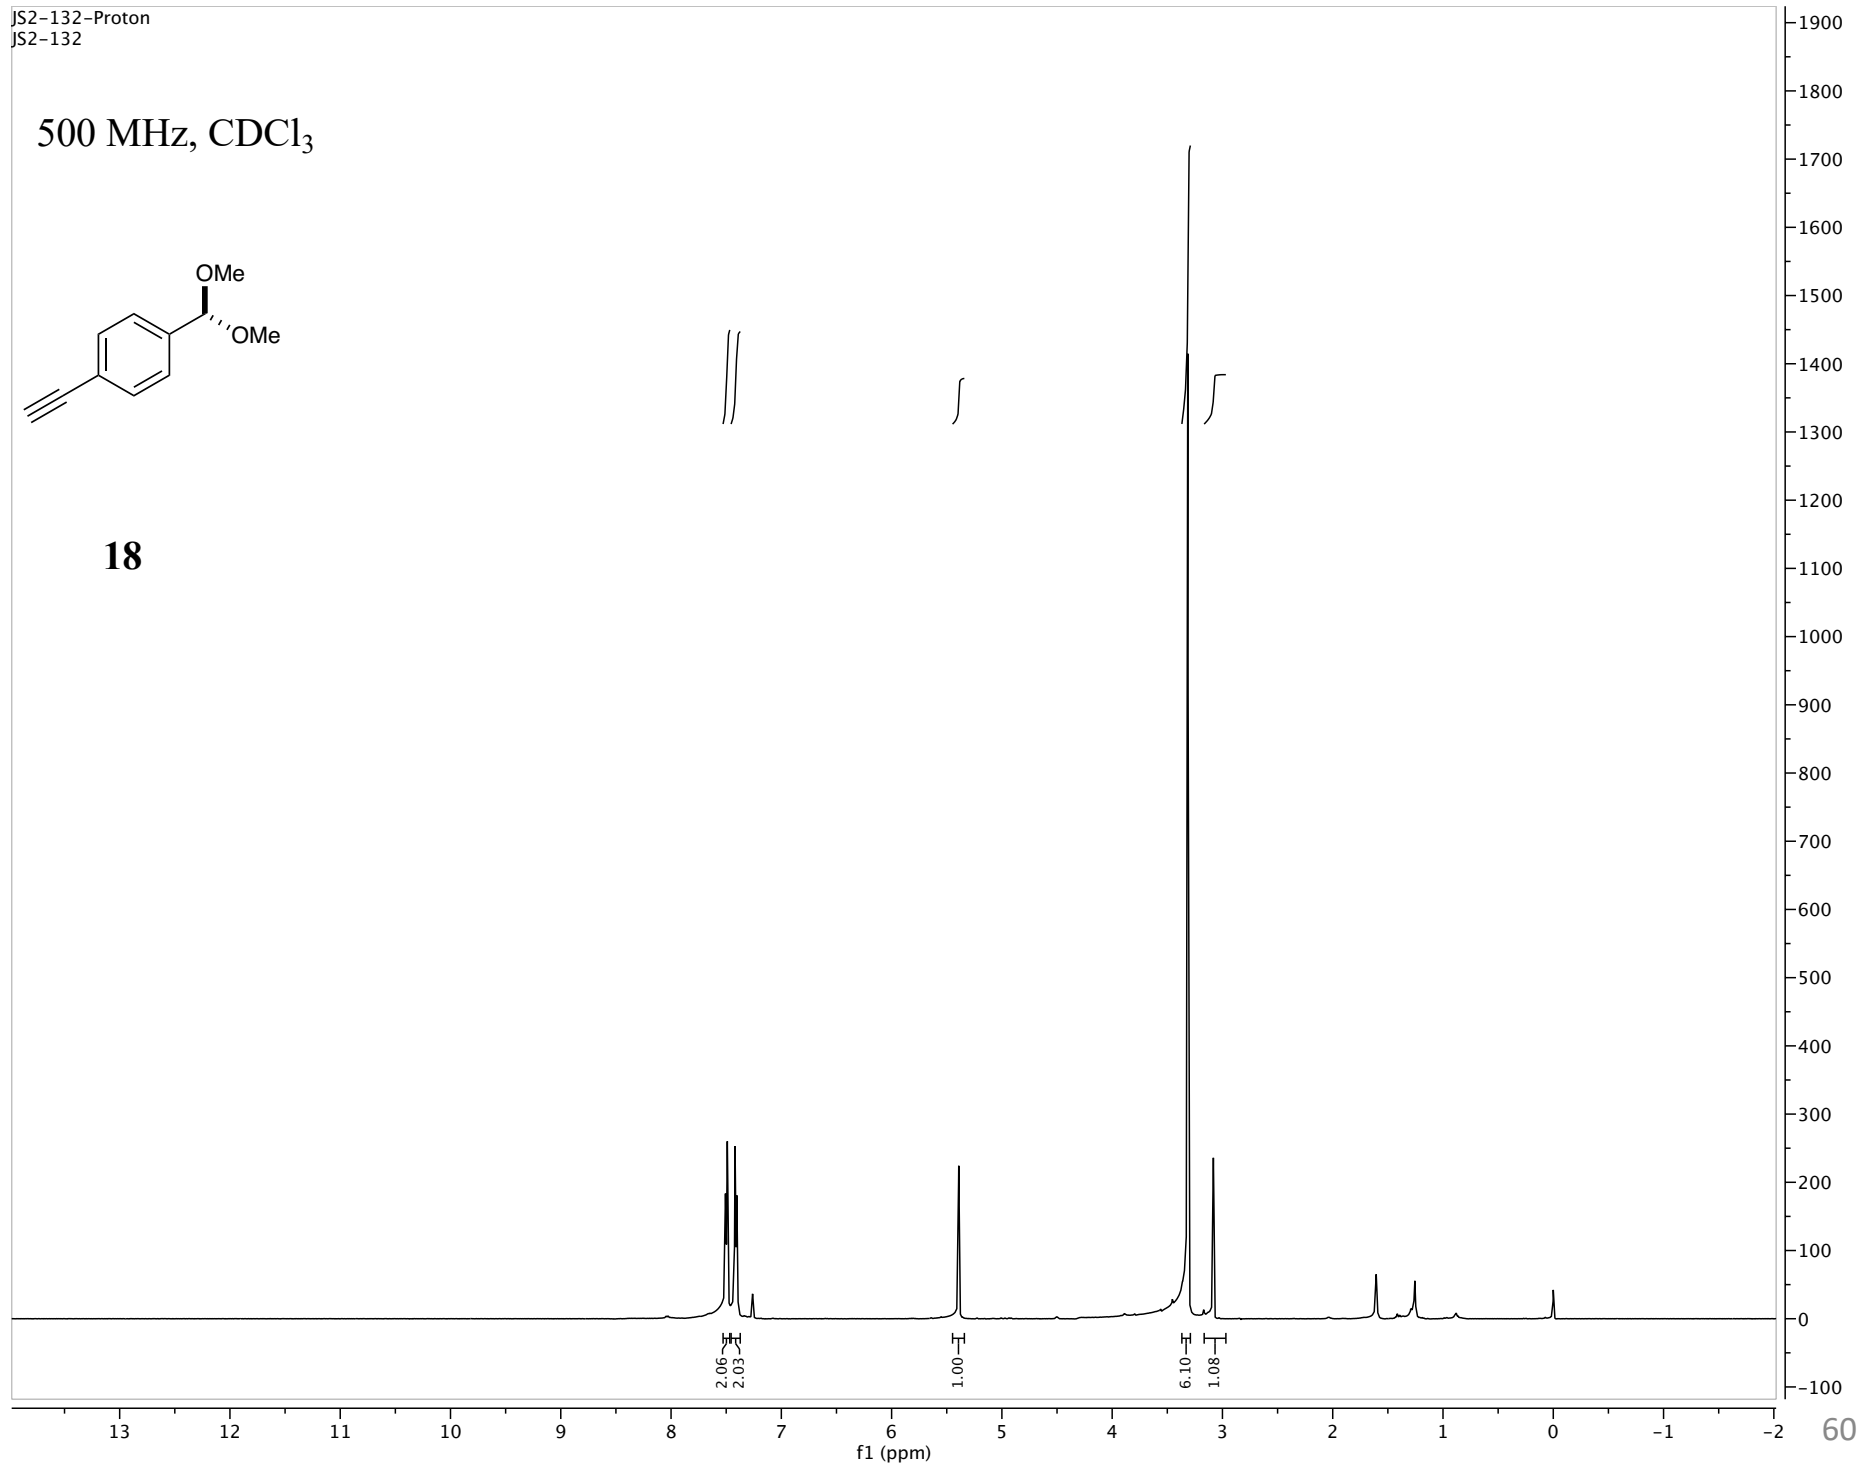

JS2-132-Carbon  
JS2-132

125 MHz, CDCl<sub>3</sub>

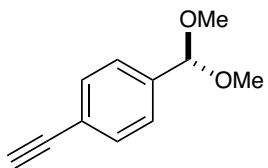

18

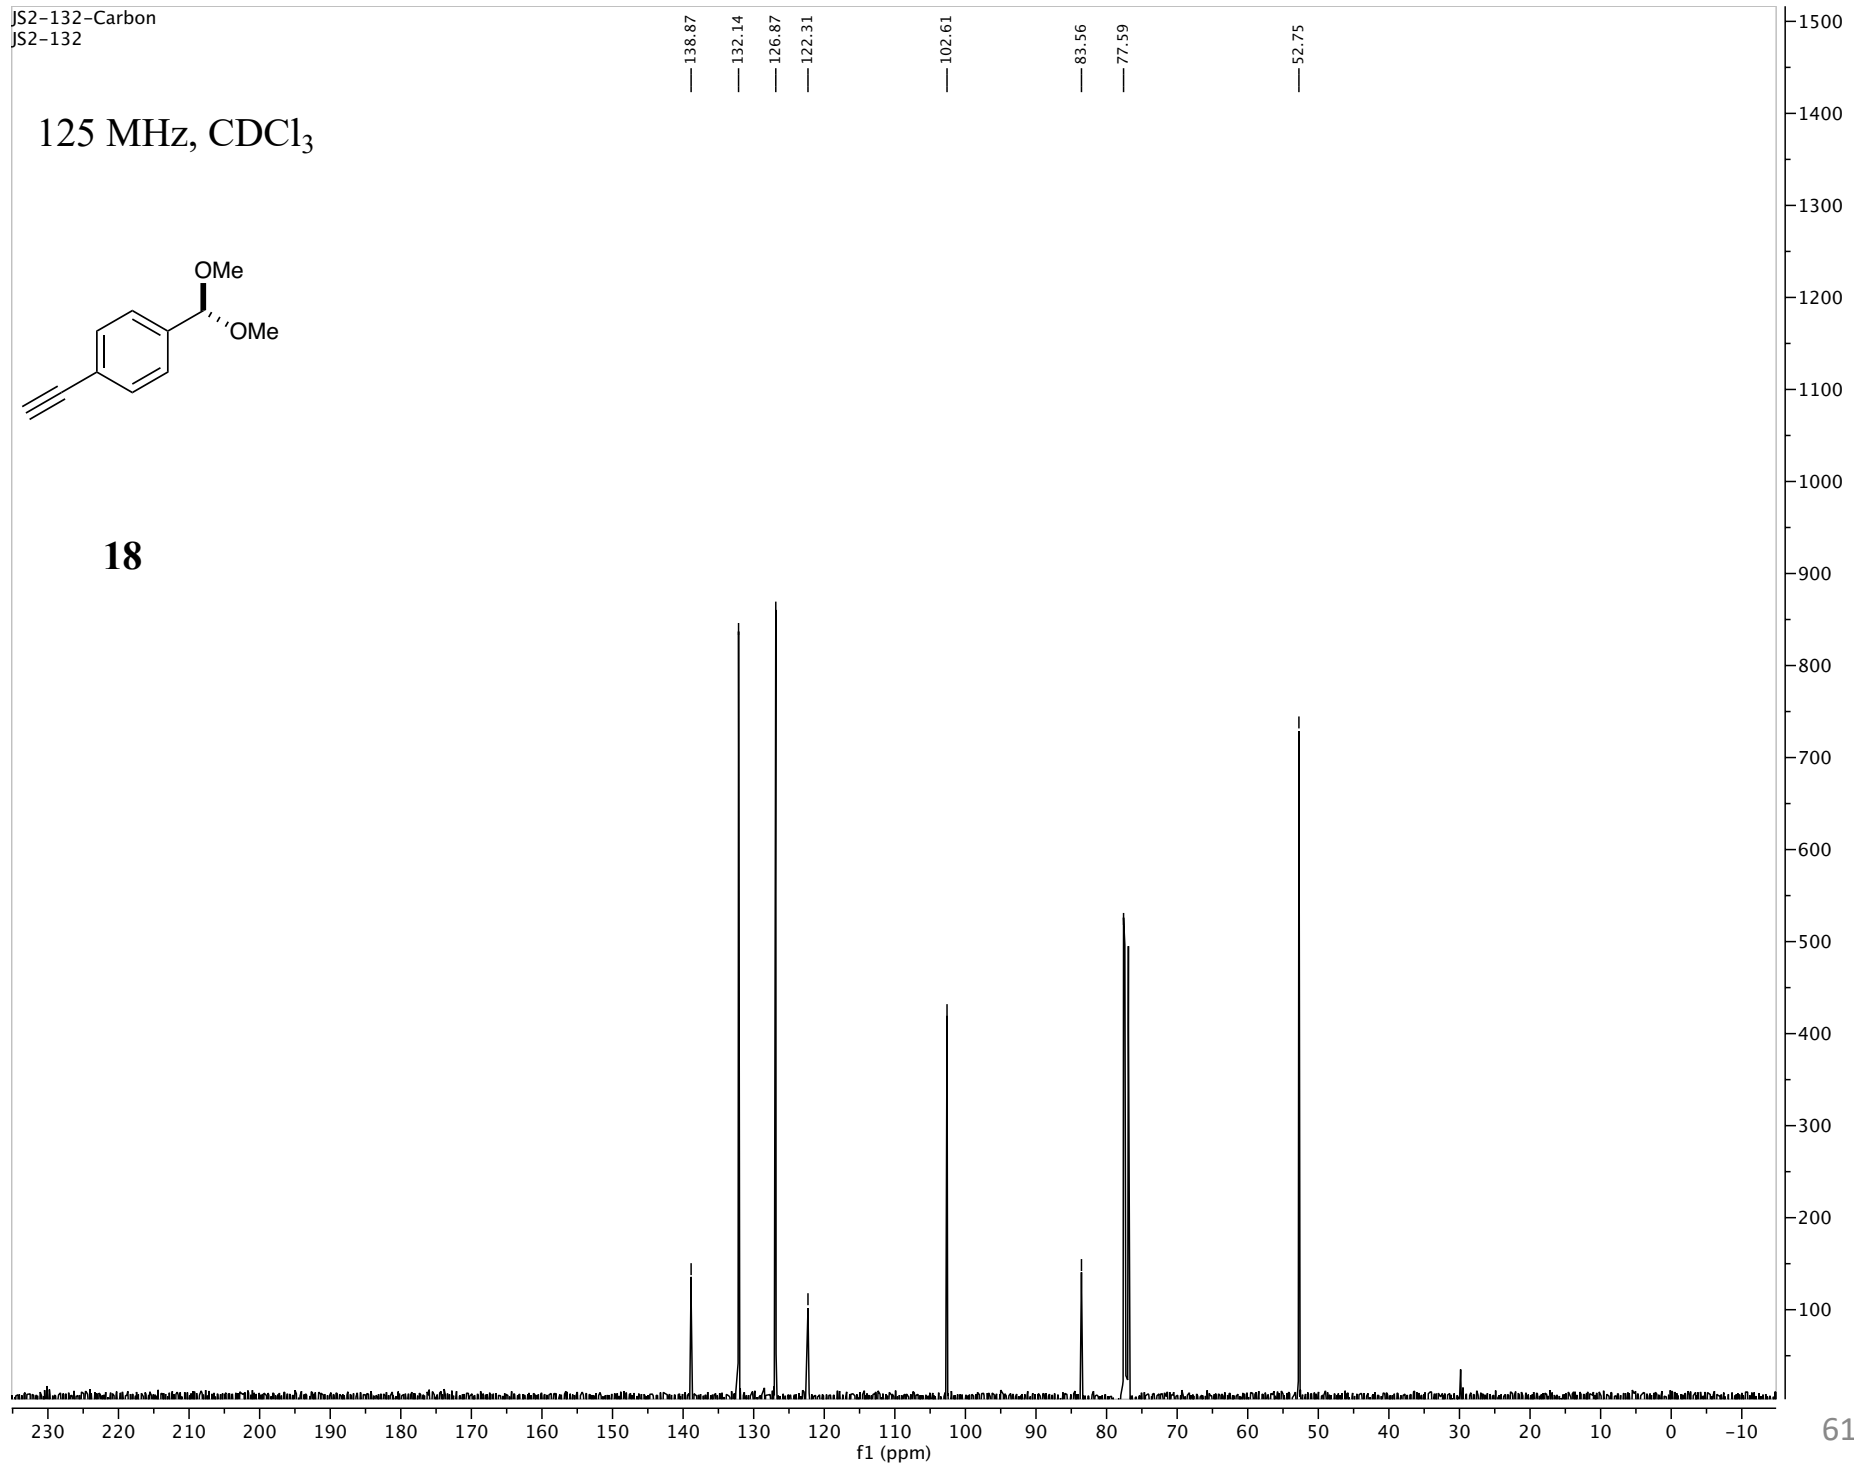

JS2-136-Proton  
JS2-136

500 MHz, CDCl<sub>3</sub>

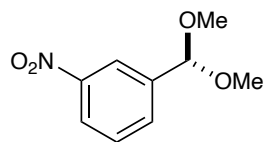

19

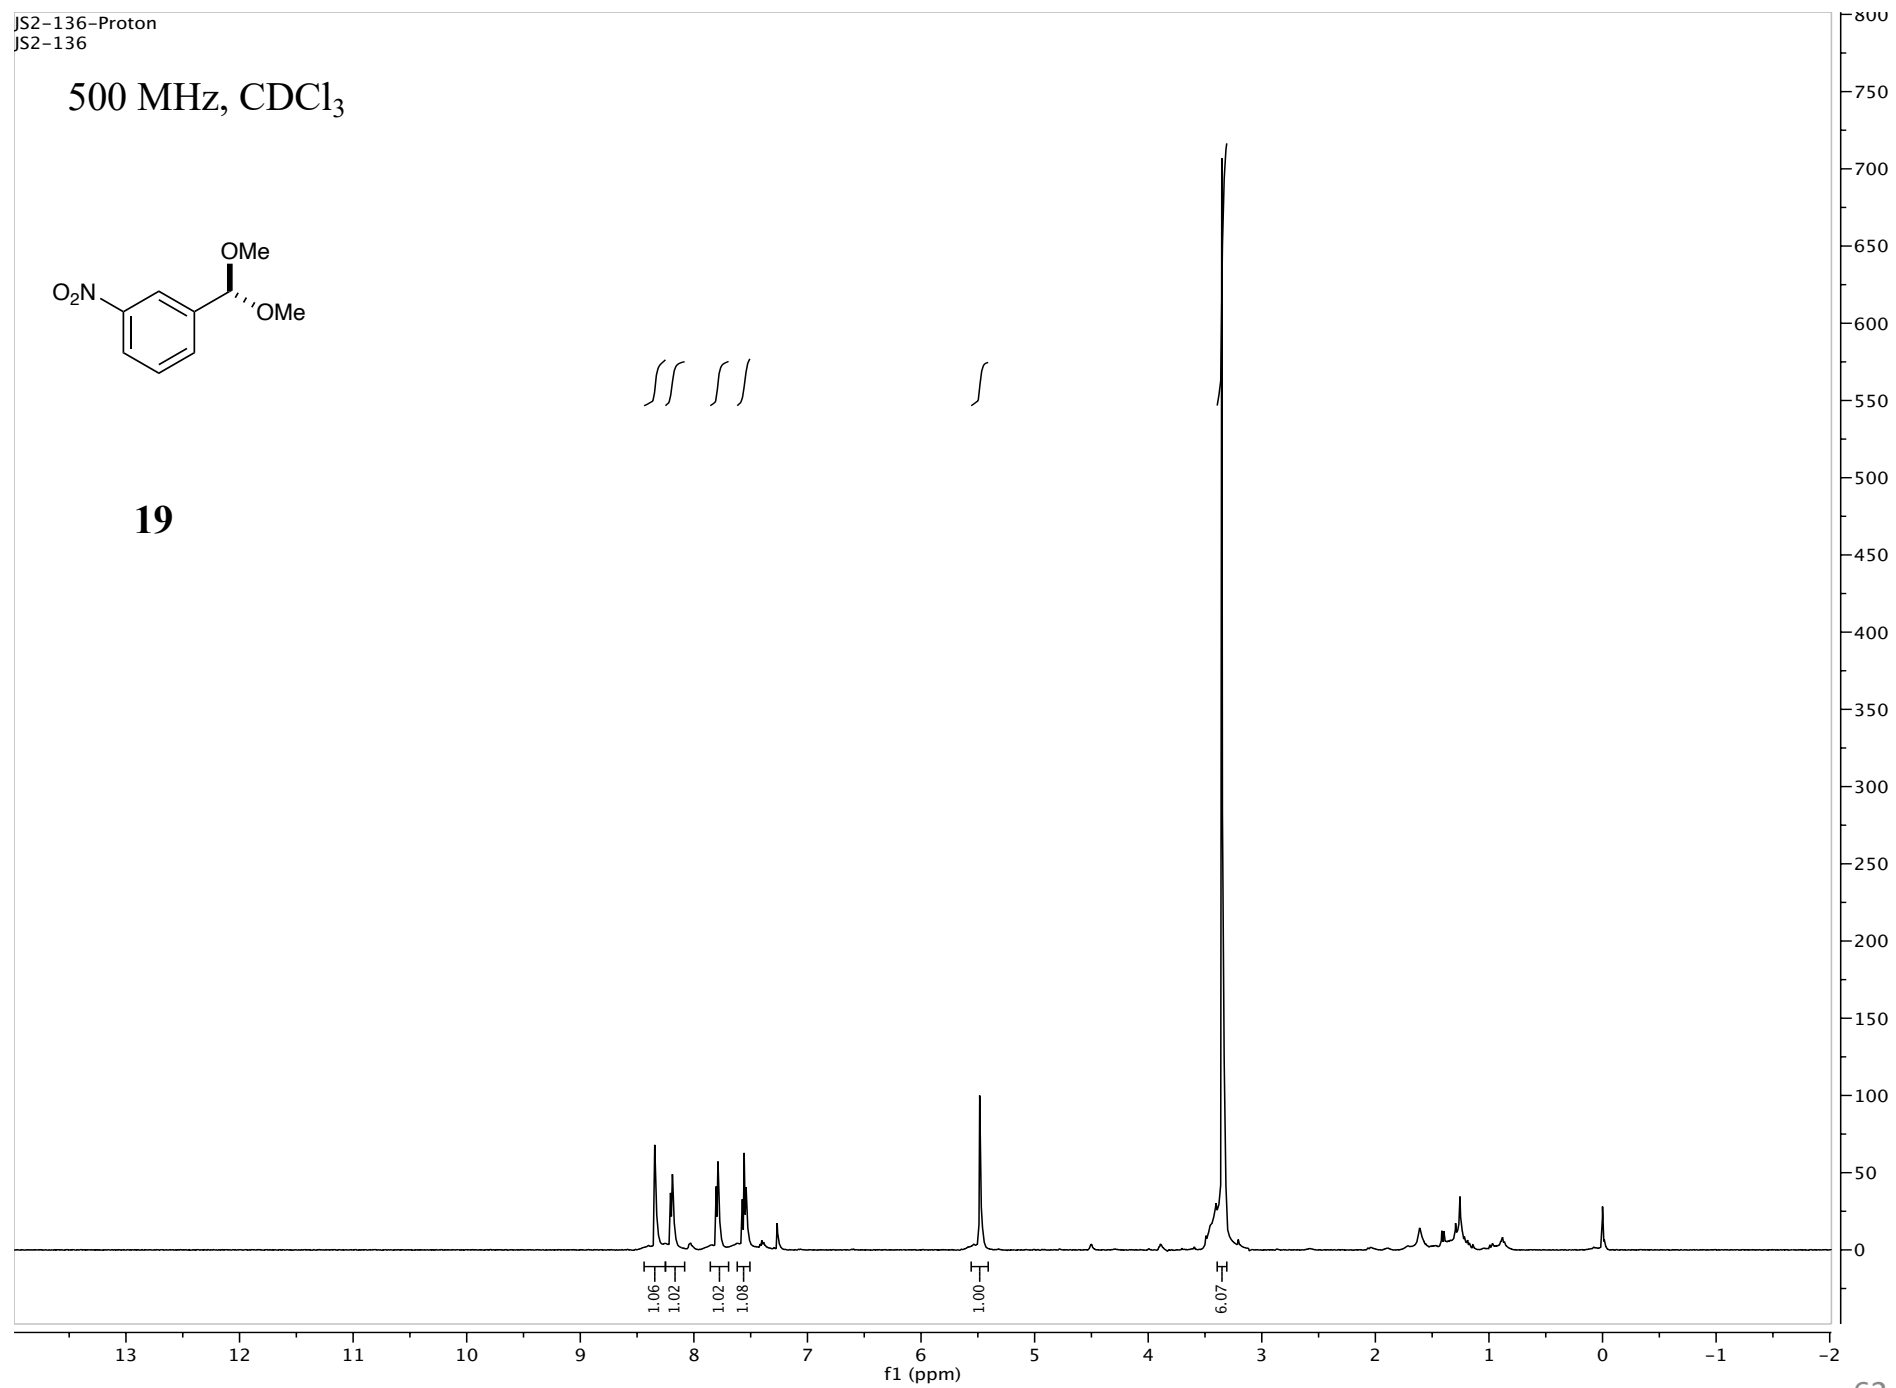

JS2-136-Carbon  
JS2-136

125 MHz, CDCl<sub>3</sub>

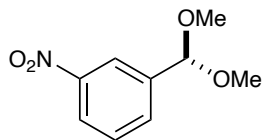

19

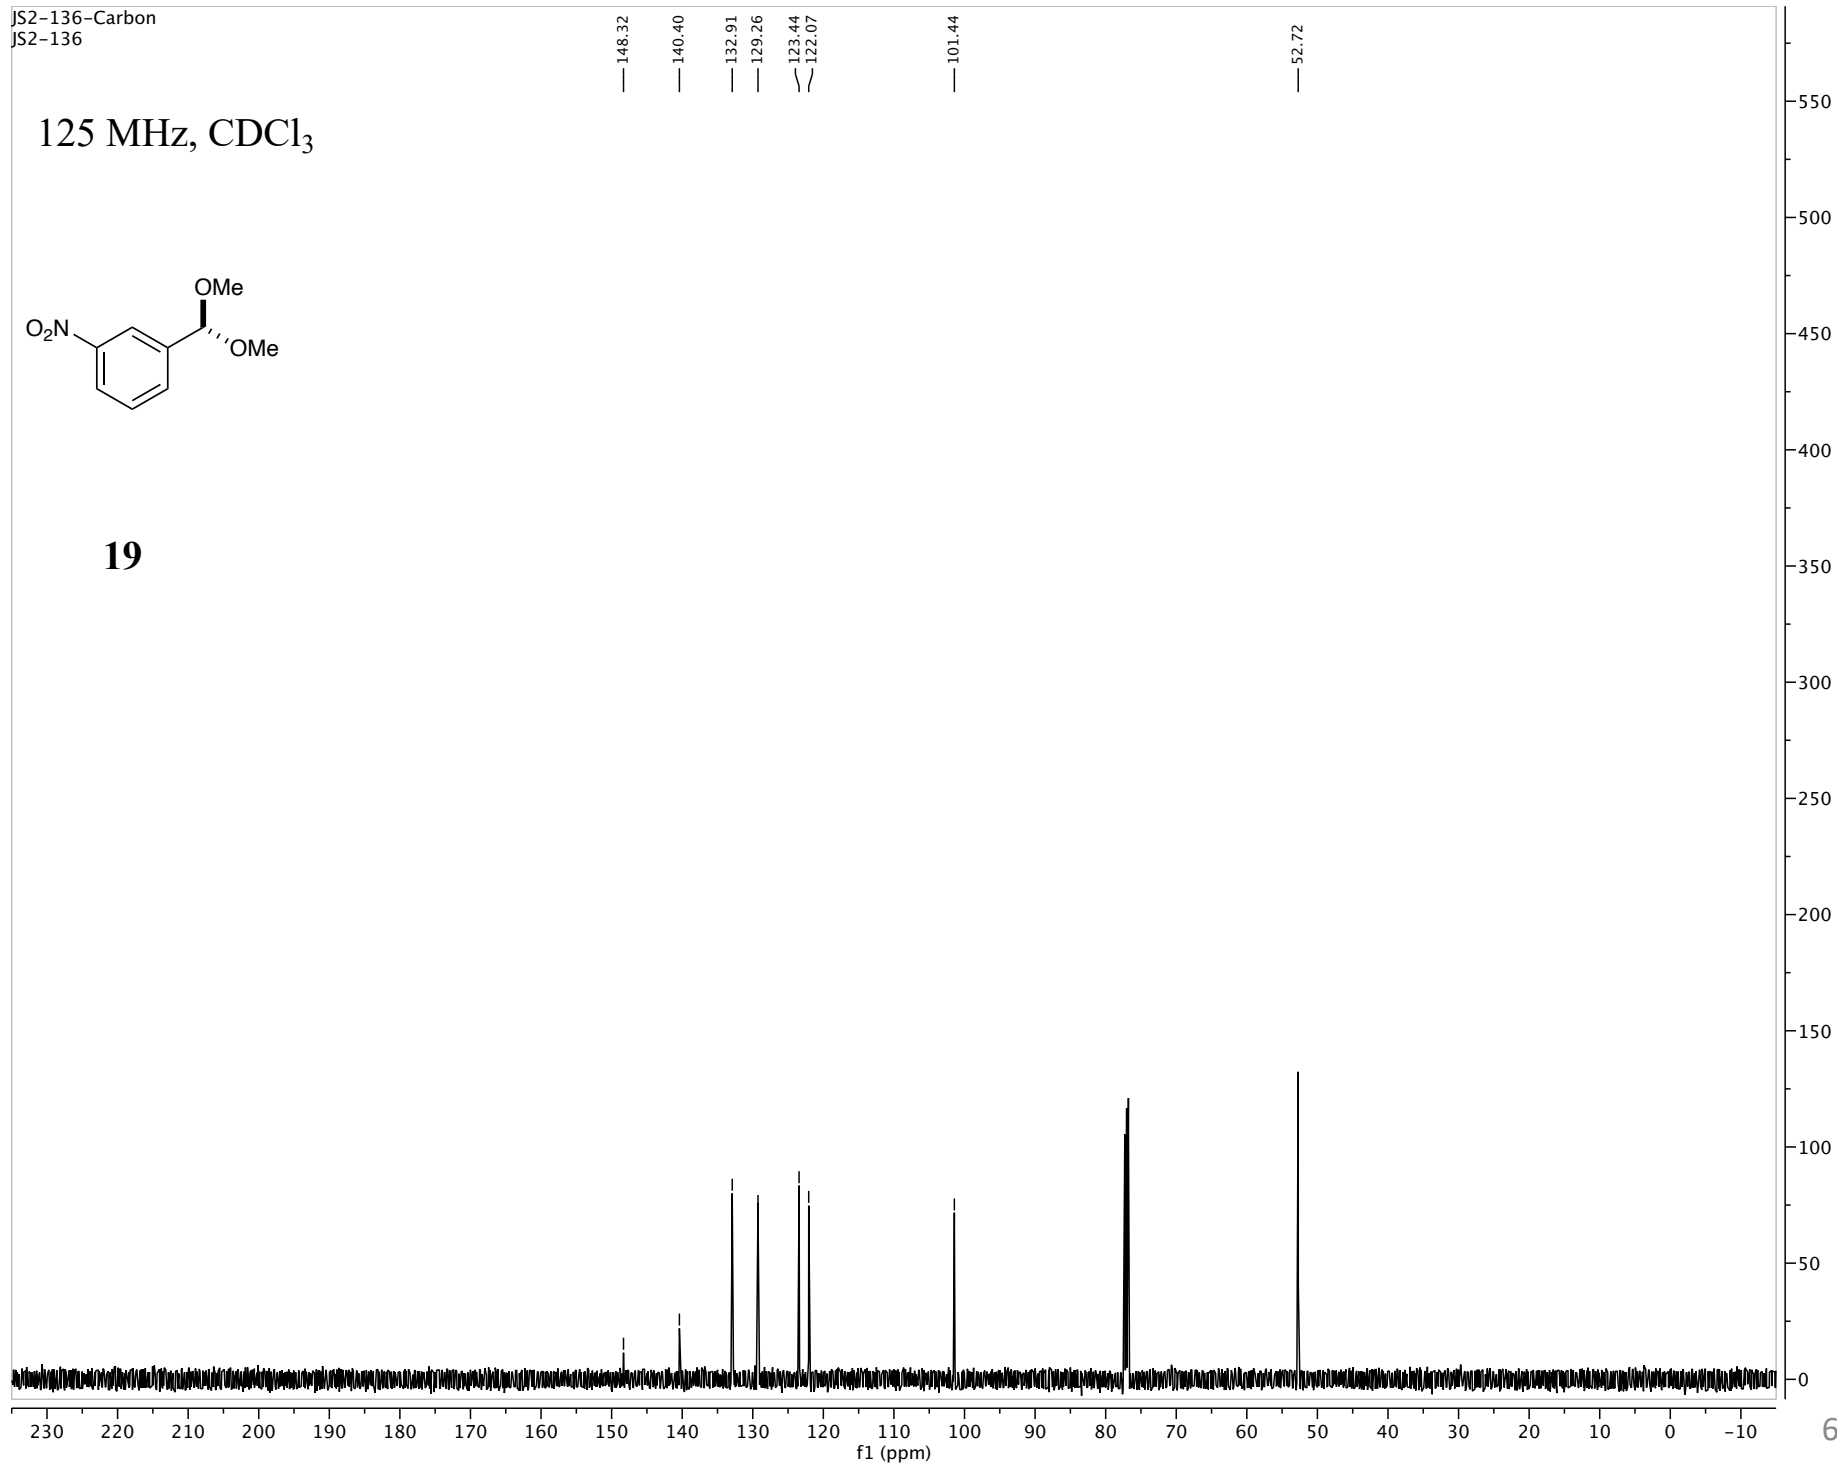

Ortho-toulic-acetal-Proton  
Ortho

500 MHz, CDCl<sub>3</sub>

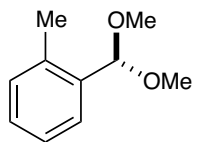

20

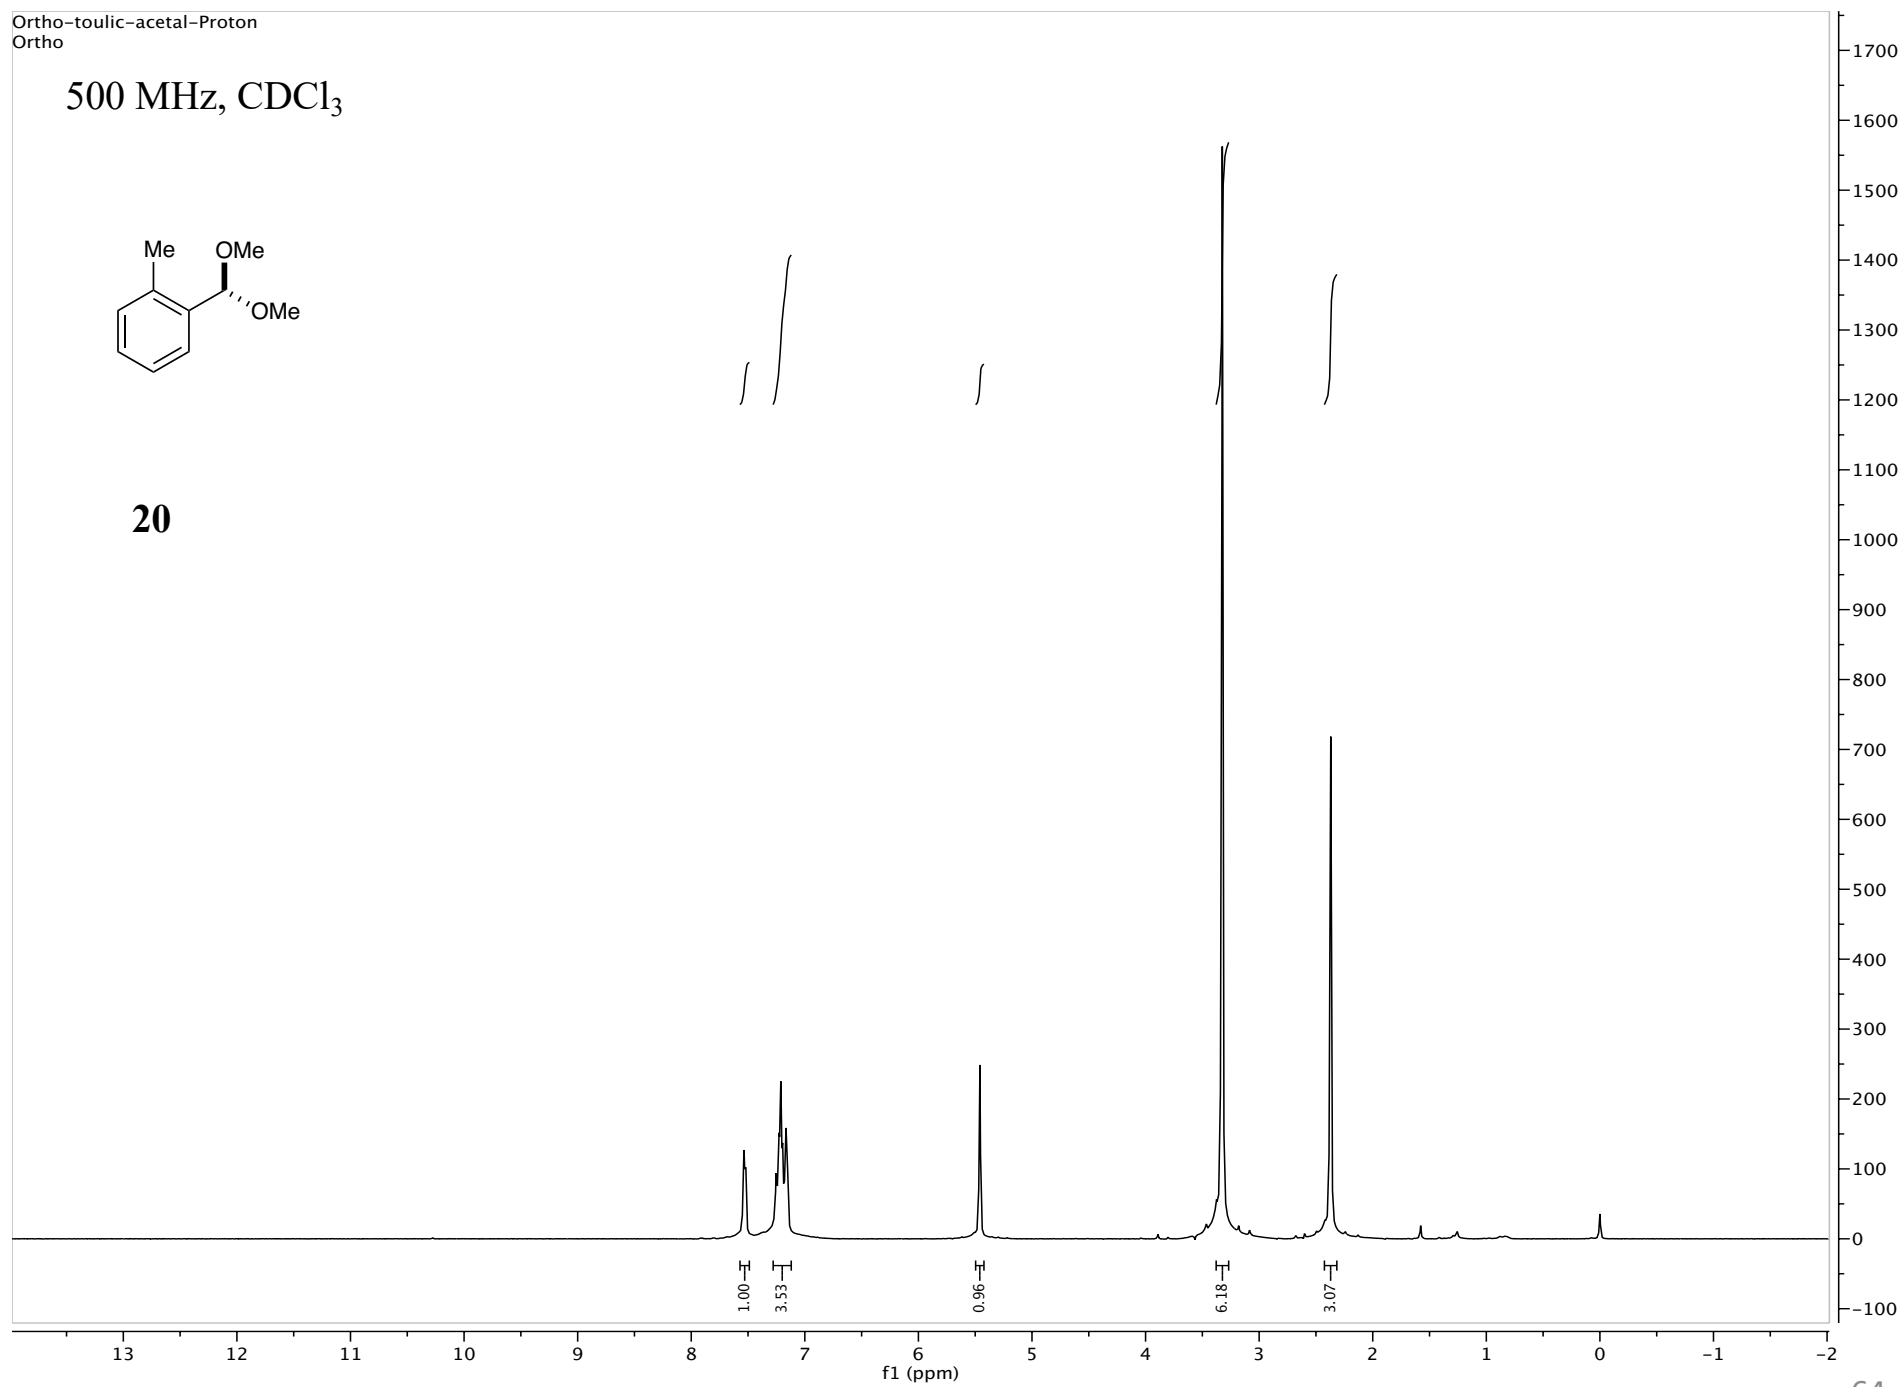



Ortho-toulic-Acetal-Carbon  
Ortho

125 MHz, CDCl<sub>3</sub>

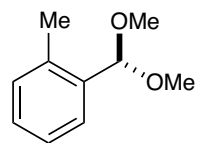

20

136.39  
135.77  
130.66  
128.51  
126.65  
125.56

101.89

53.16

19.02

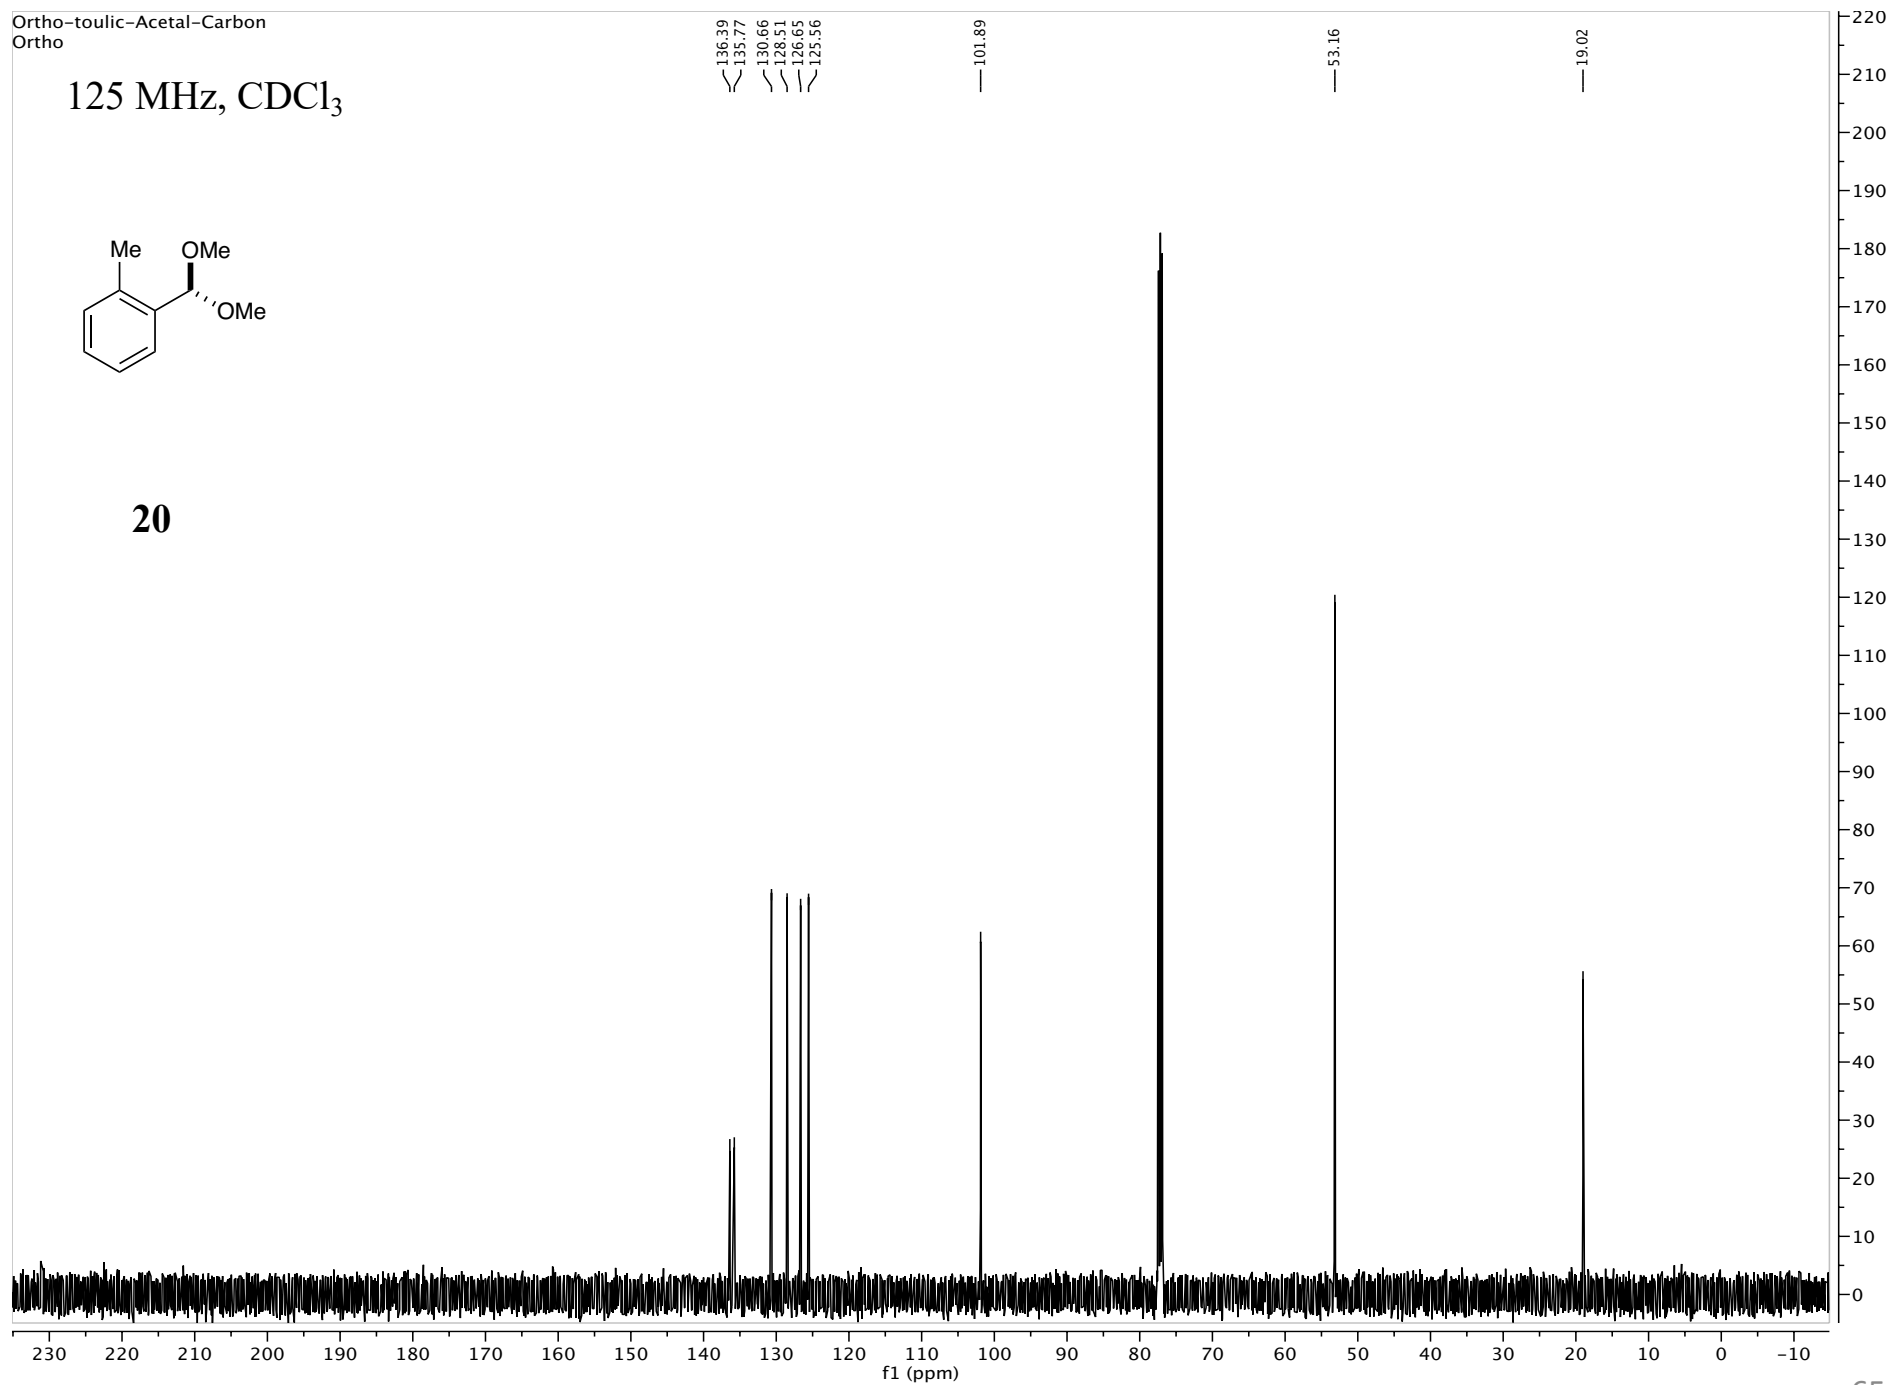

JS2-135-Proton  
JS2-135

500 MHz, CDCl<sub>3</sub>

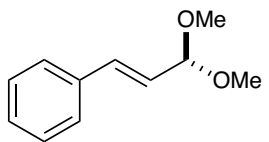

(70:30 mixture of *E*:*Z* isomers)

**21**

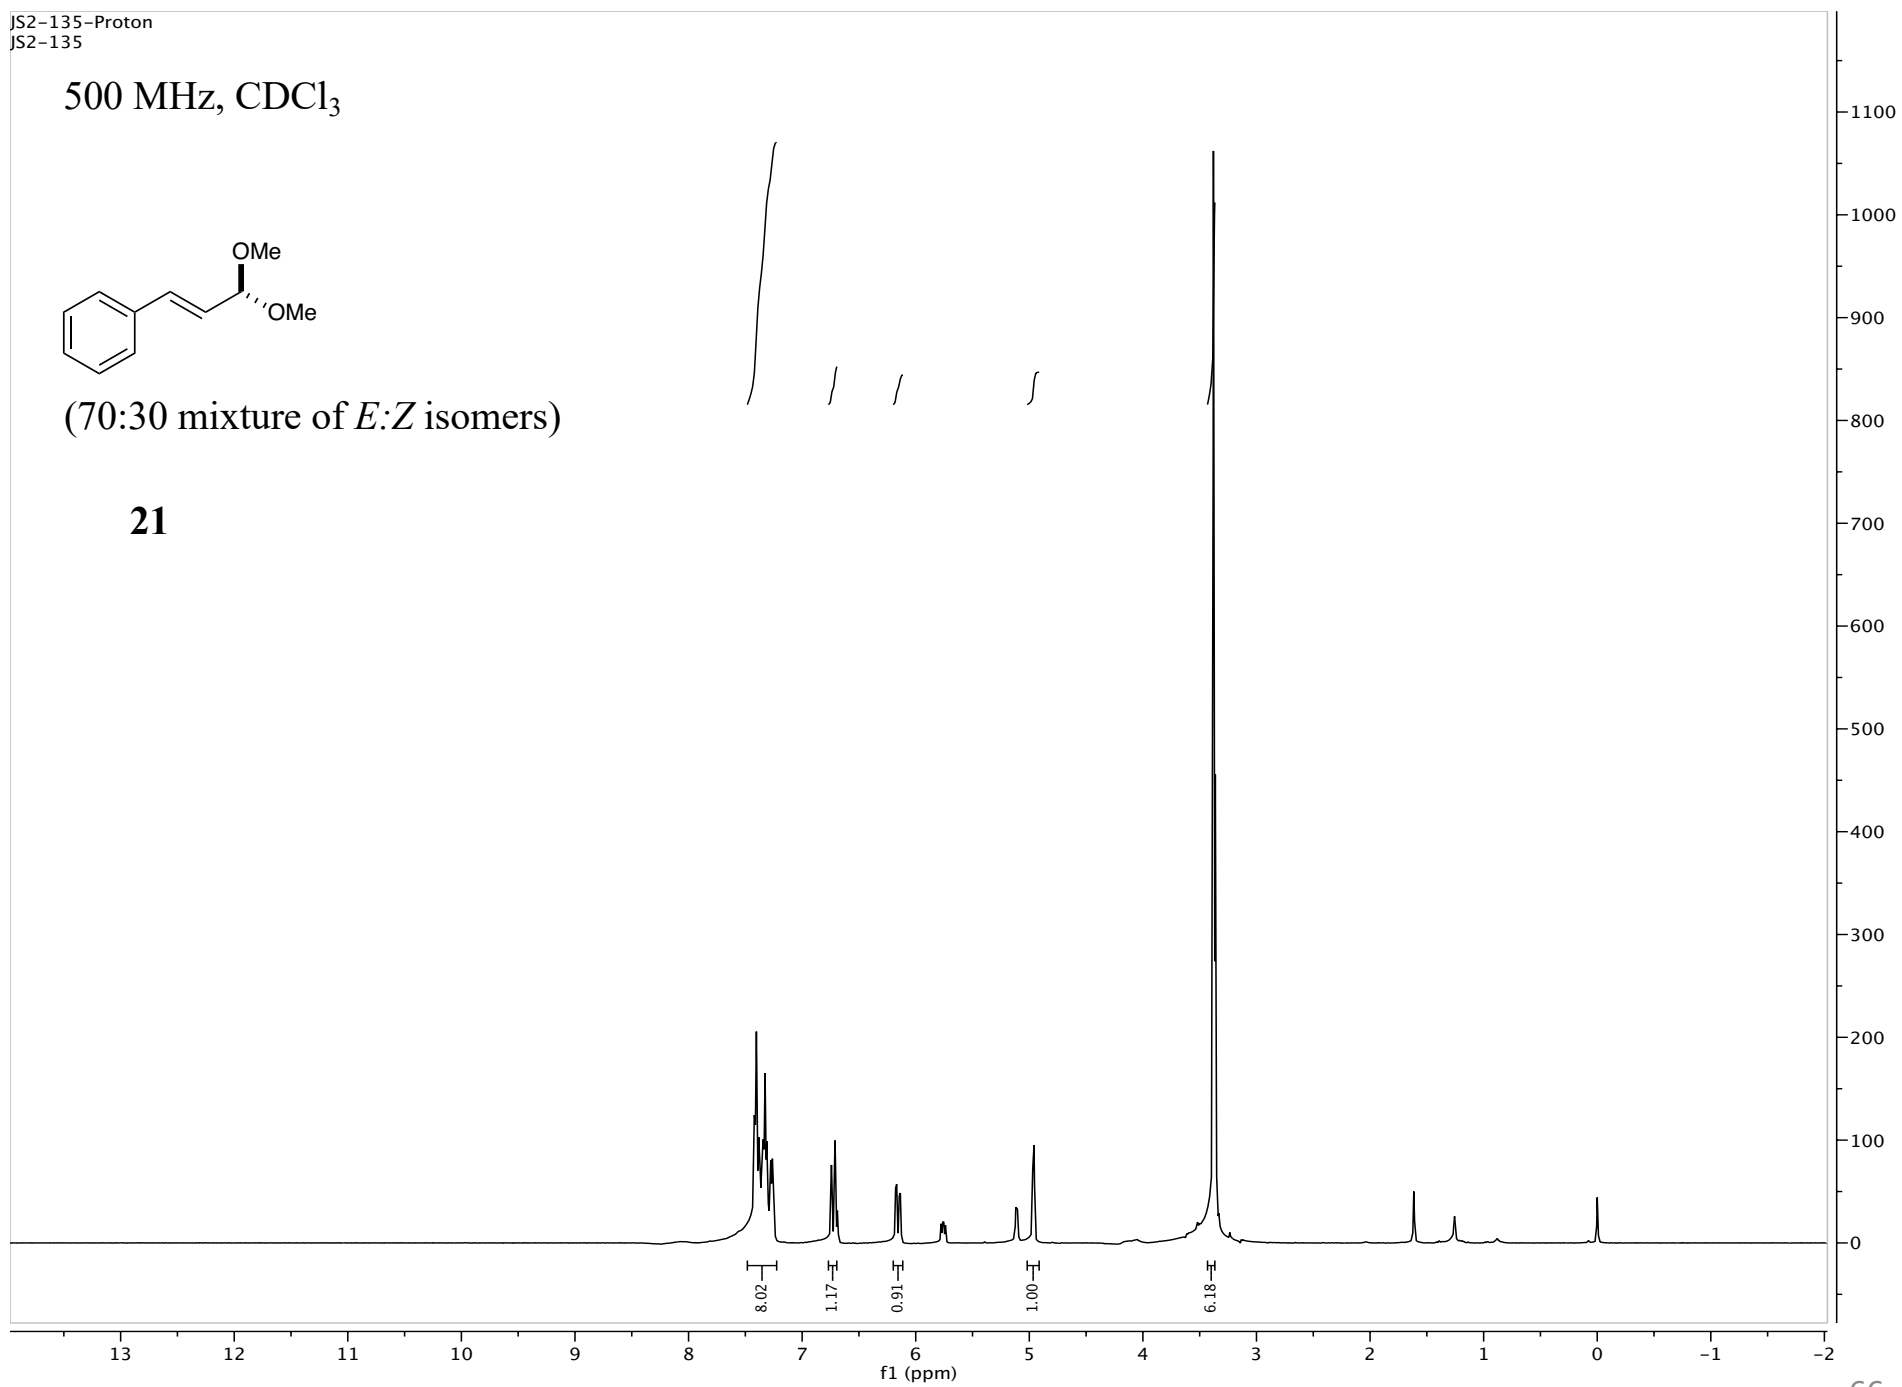

JS2-135-Carbon  
JS2-135

125 MHz, CDCl<sub>3</sub>

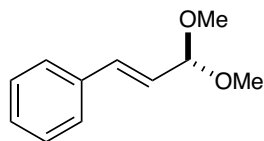

(70:30 mixture of *E*:*Z* isomers)

**21**

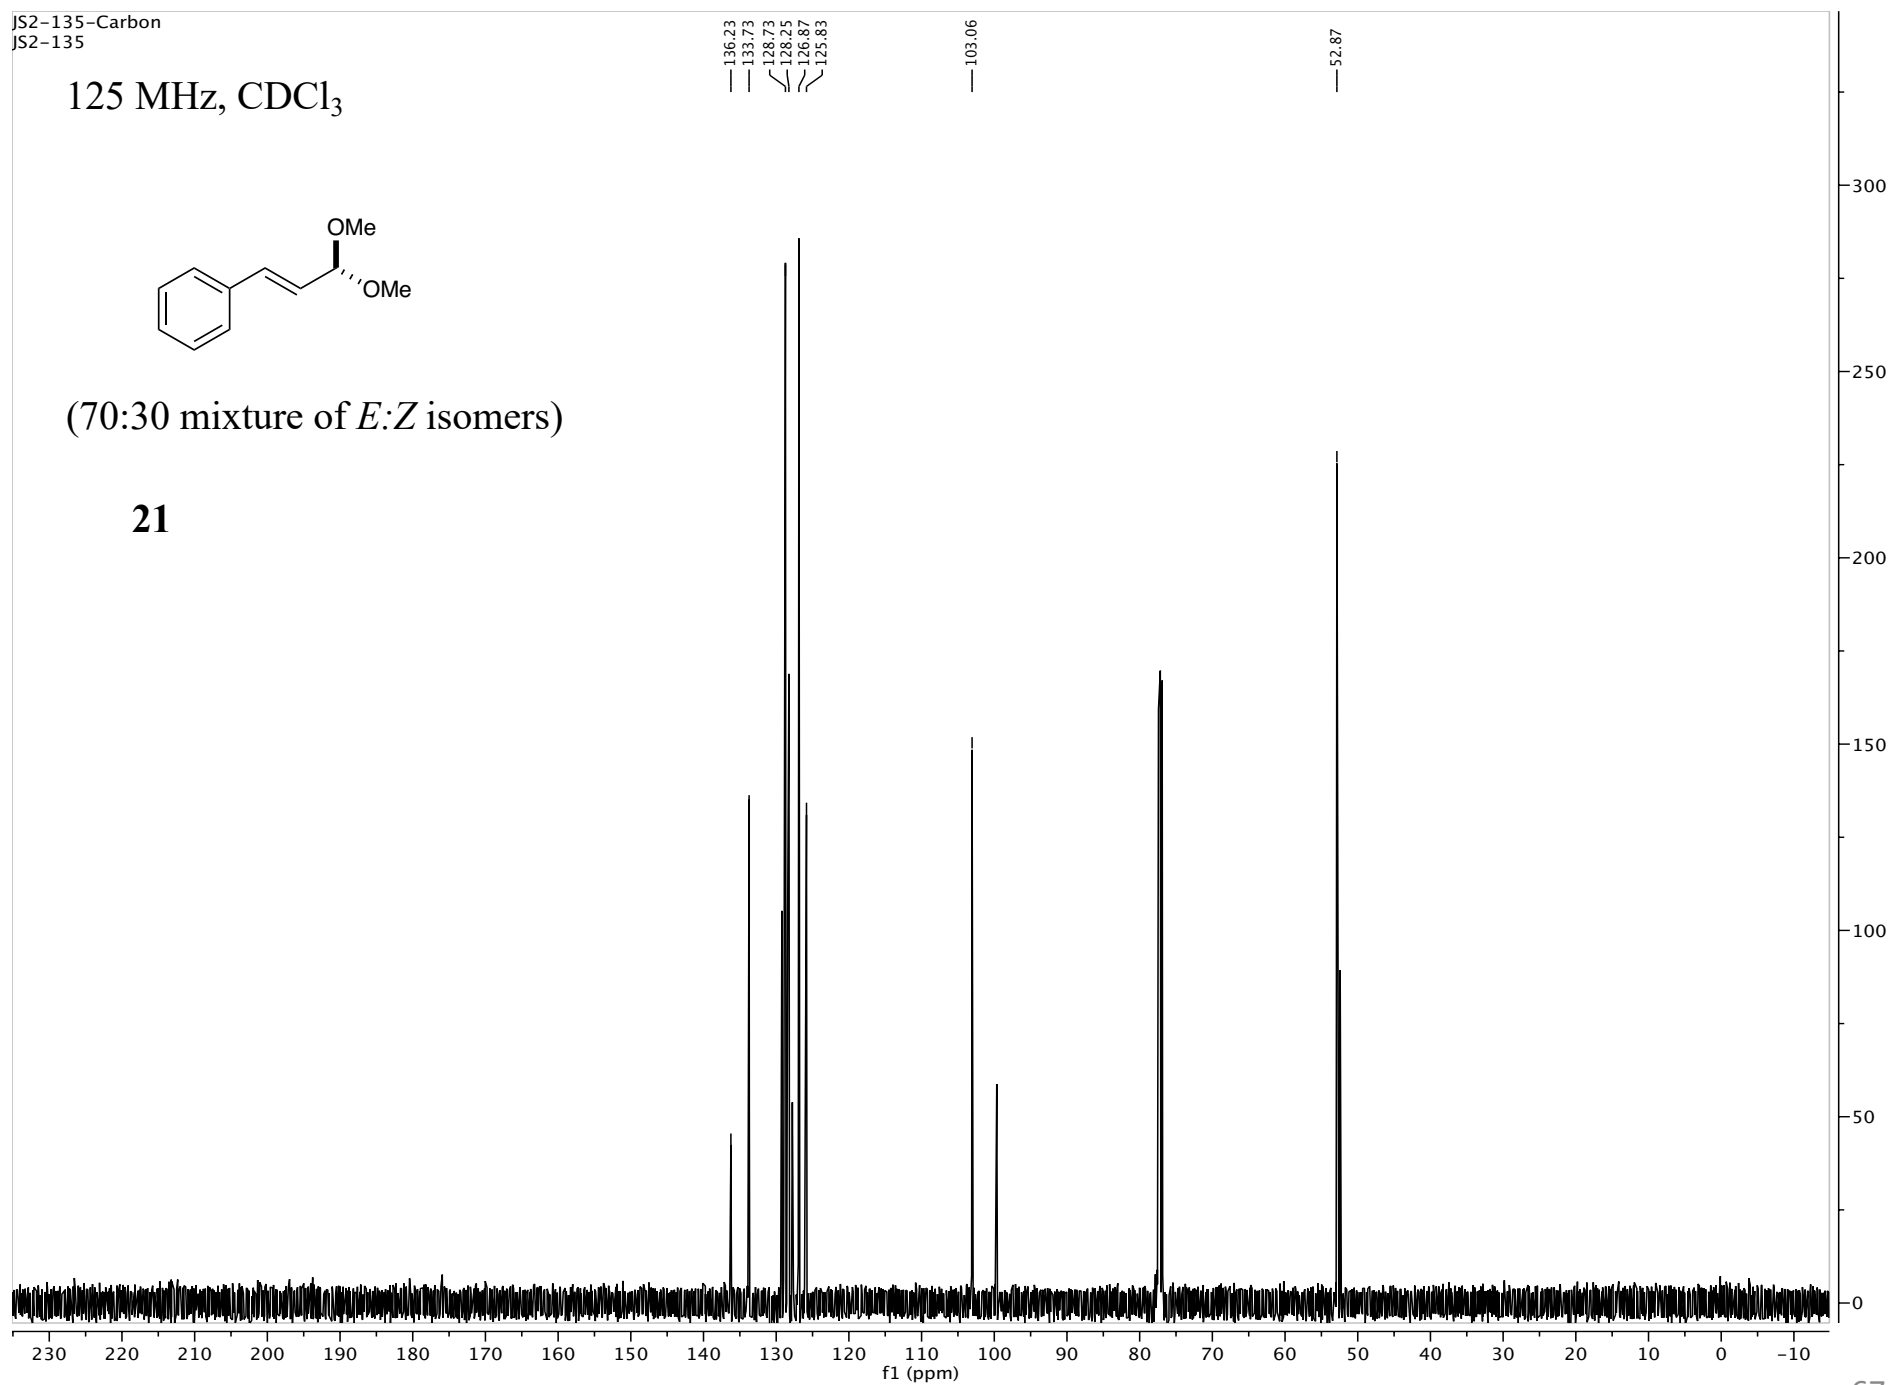

500 MHz, CDCl<sub>3</sub>

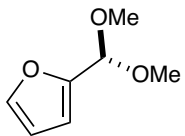

22

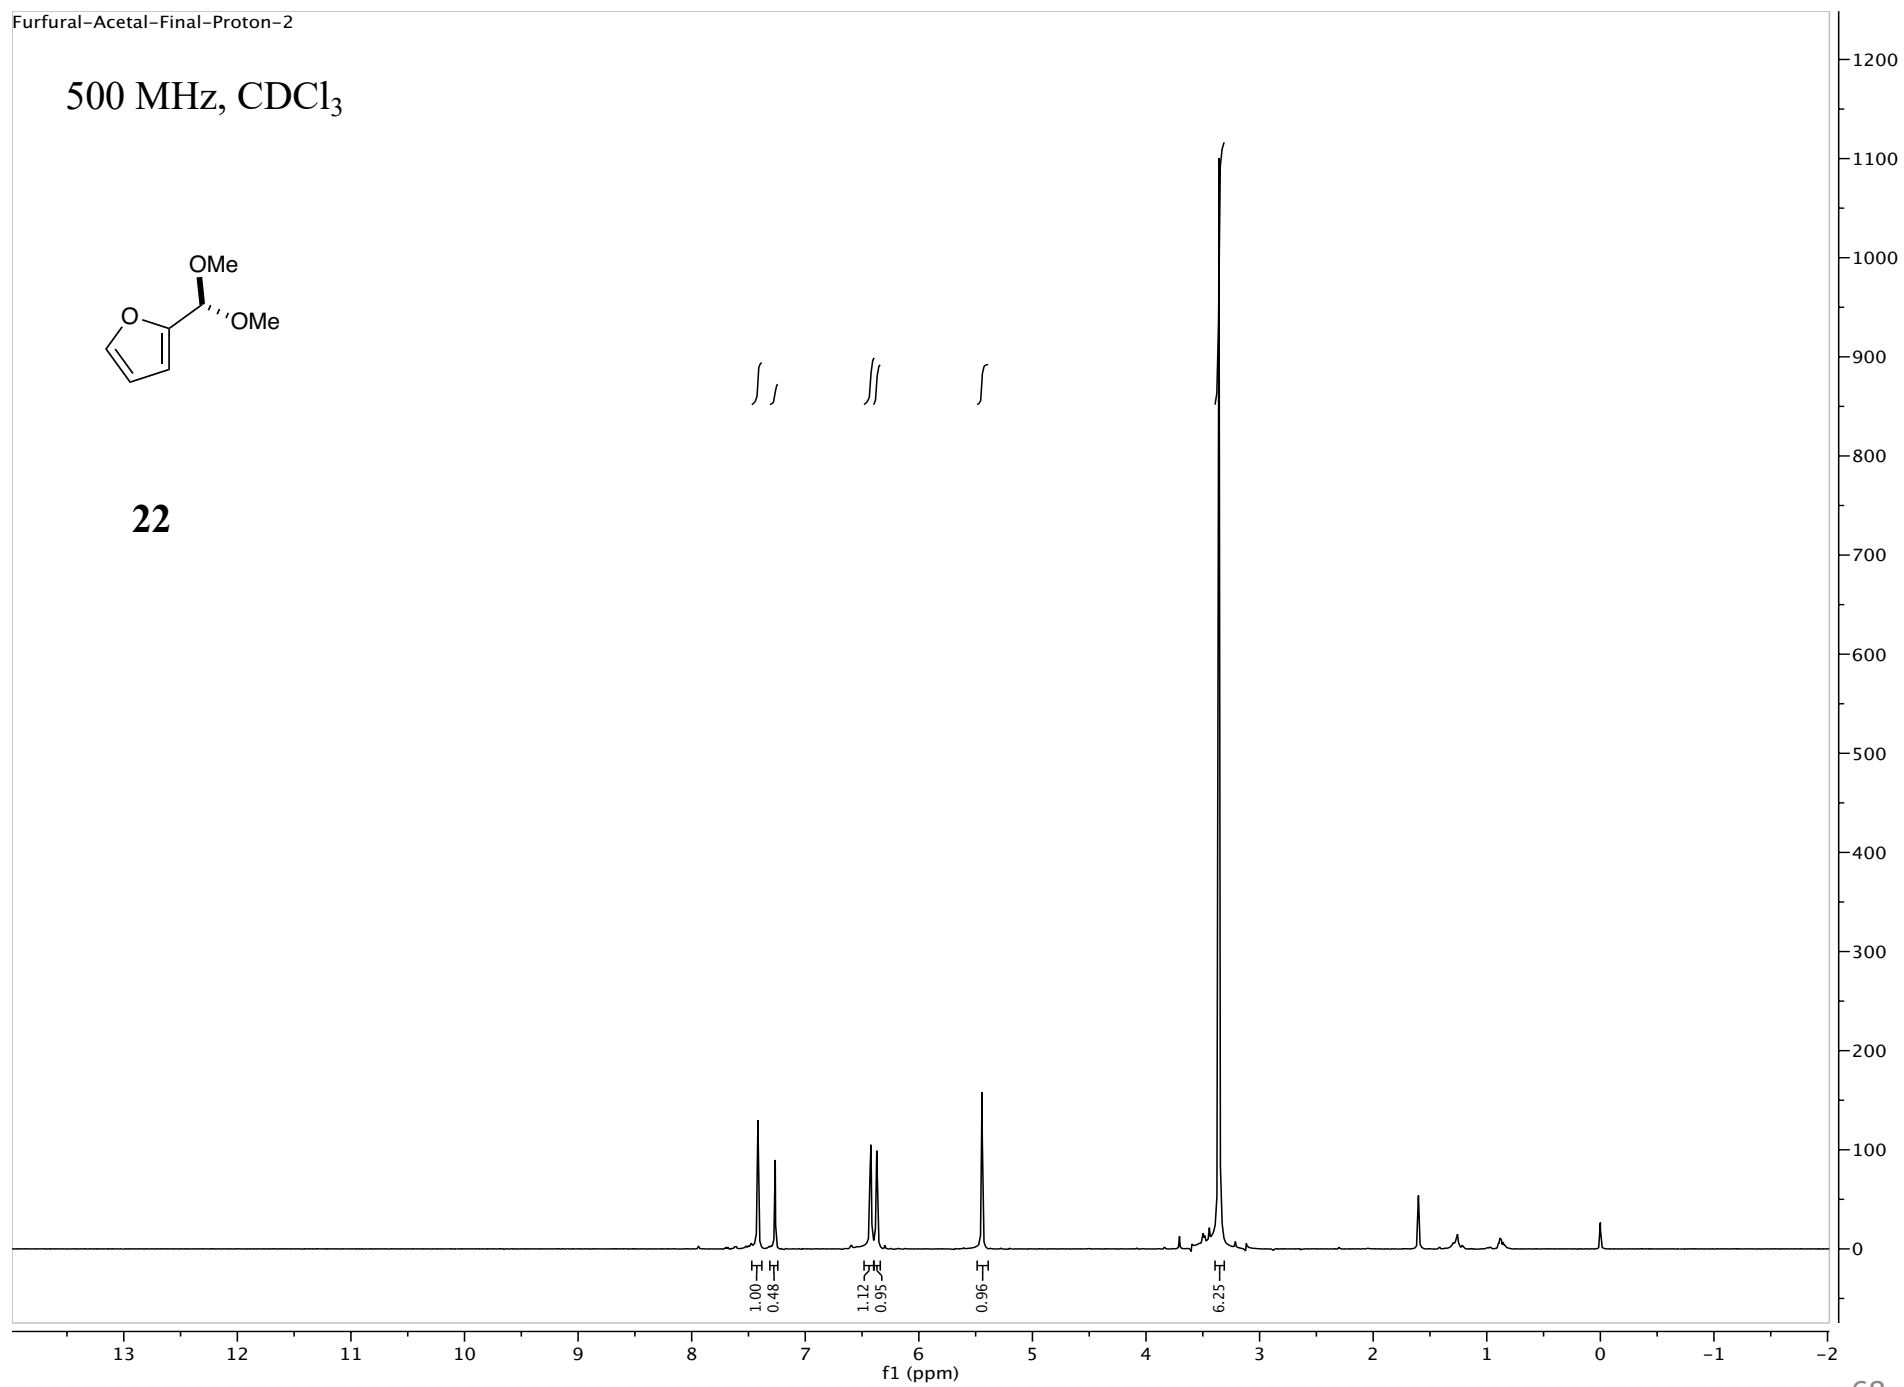

125 MHz, CDCl<sub>3</sub>

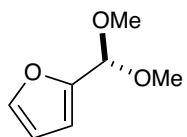

22

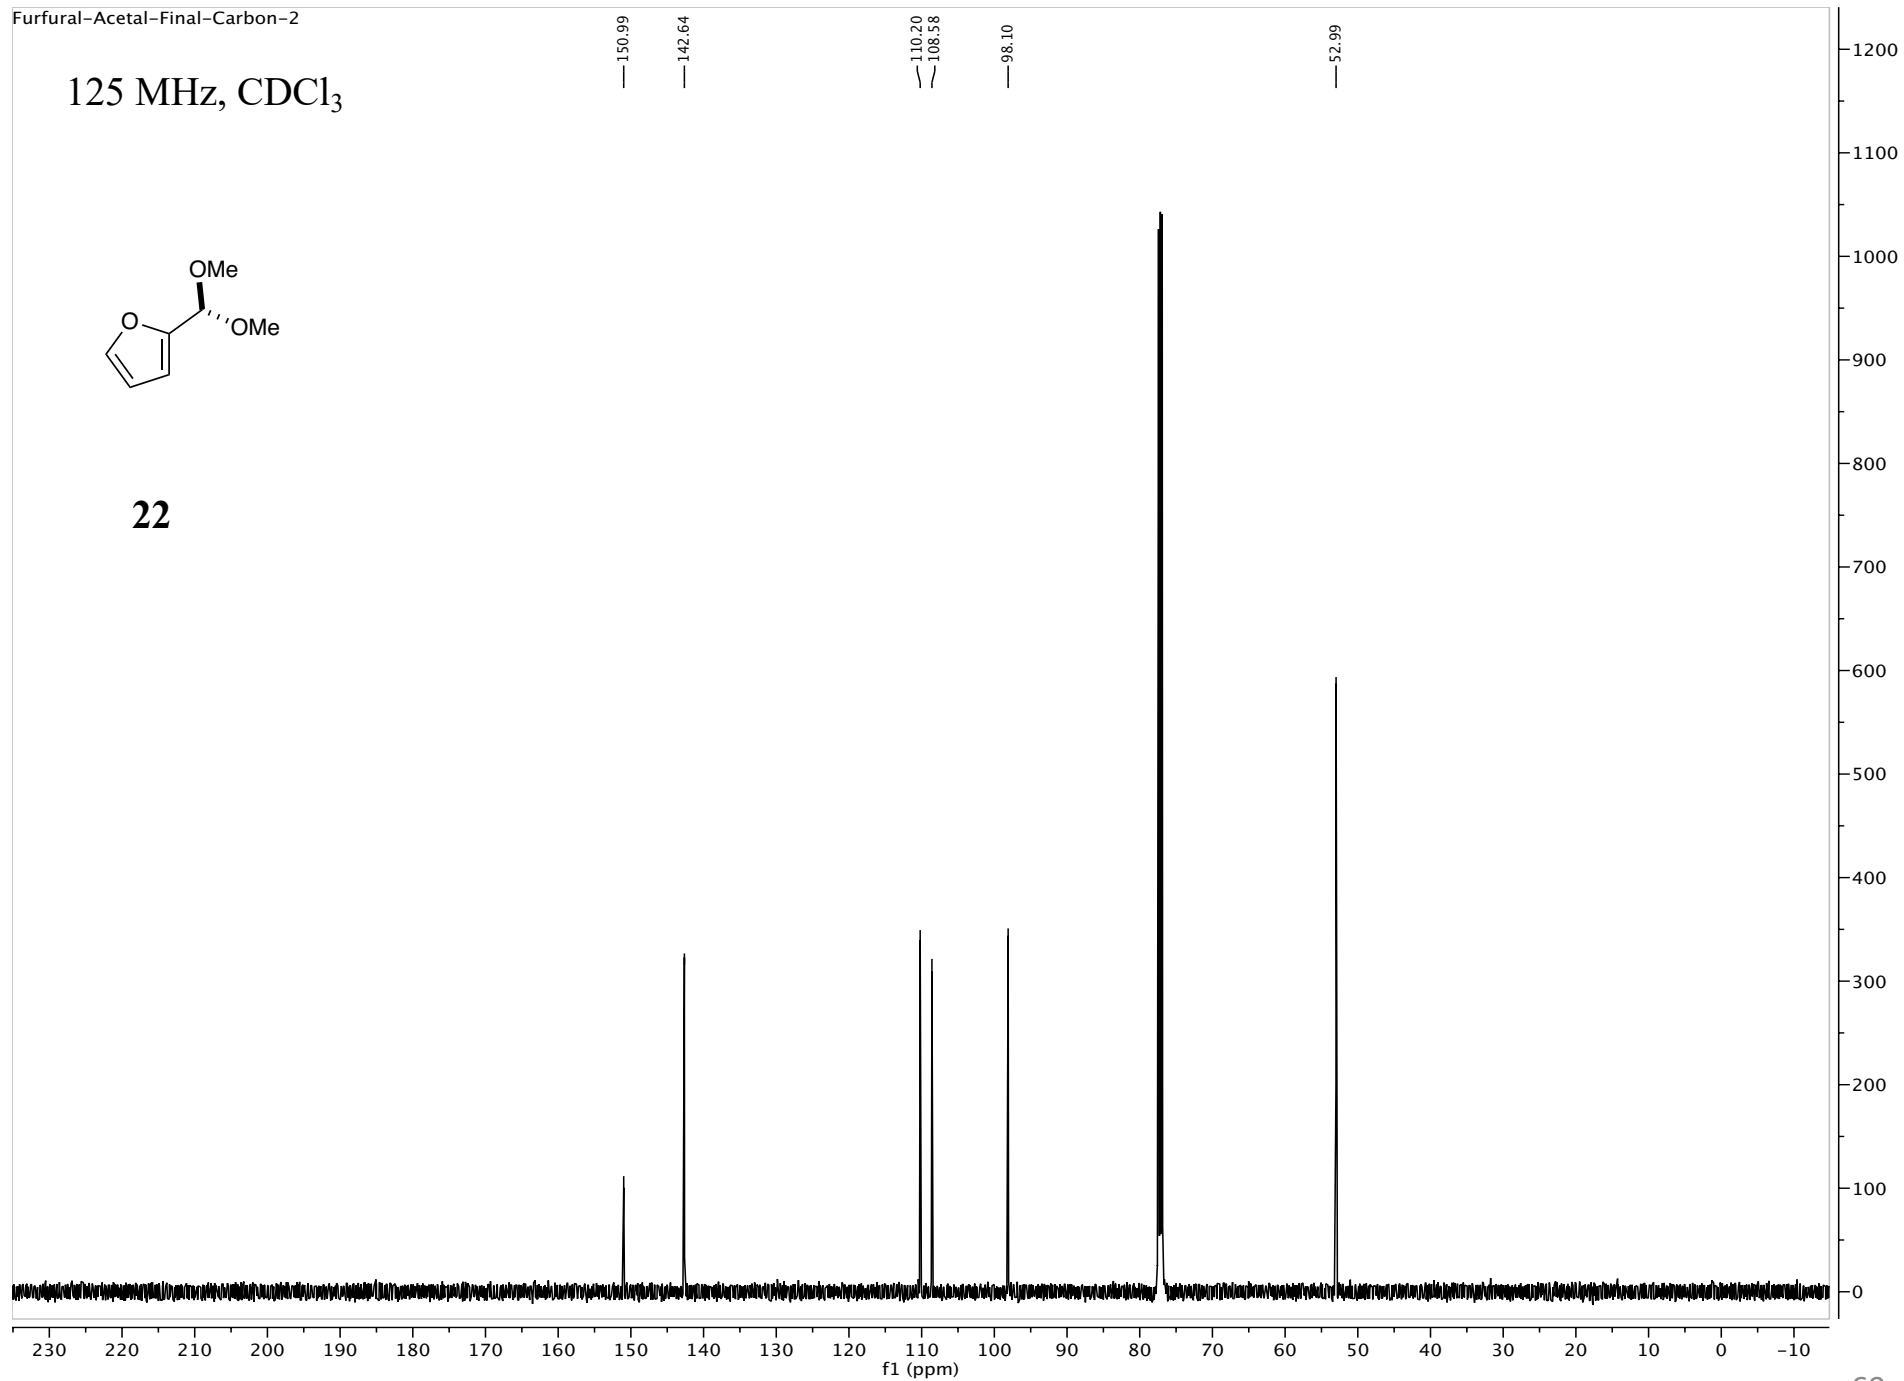

500 MHz, CDCl<sub>3</sub>

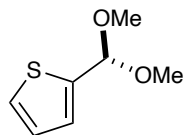

23

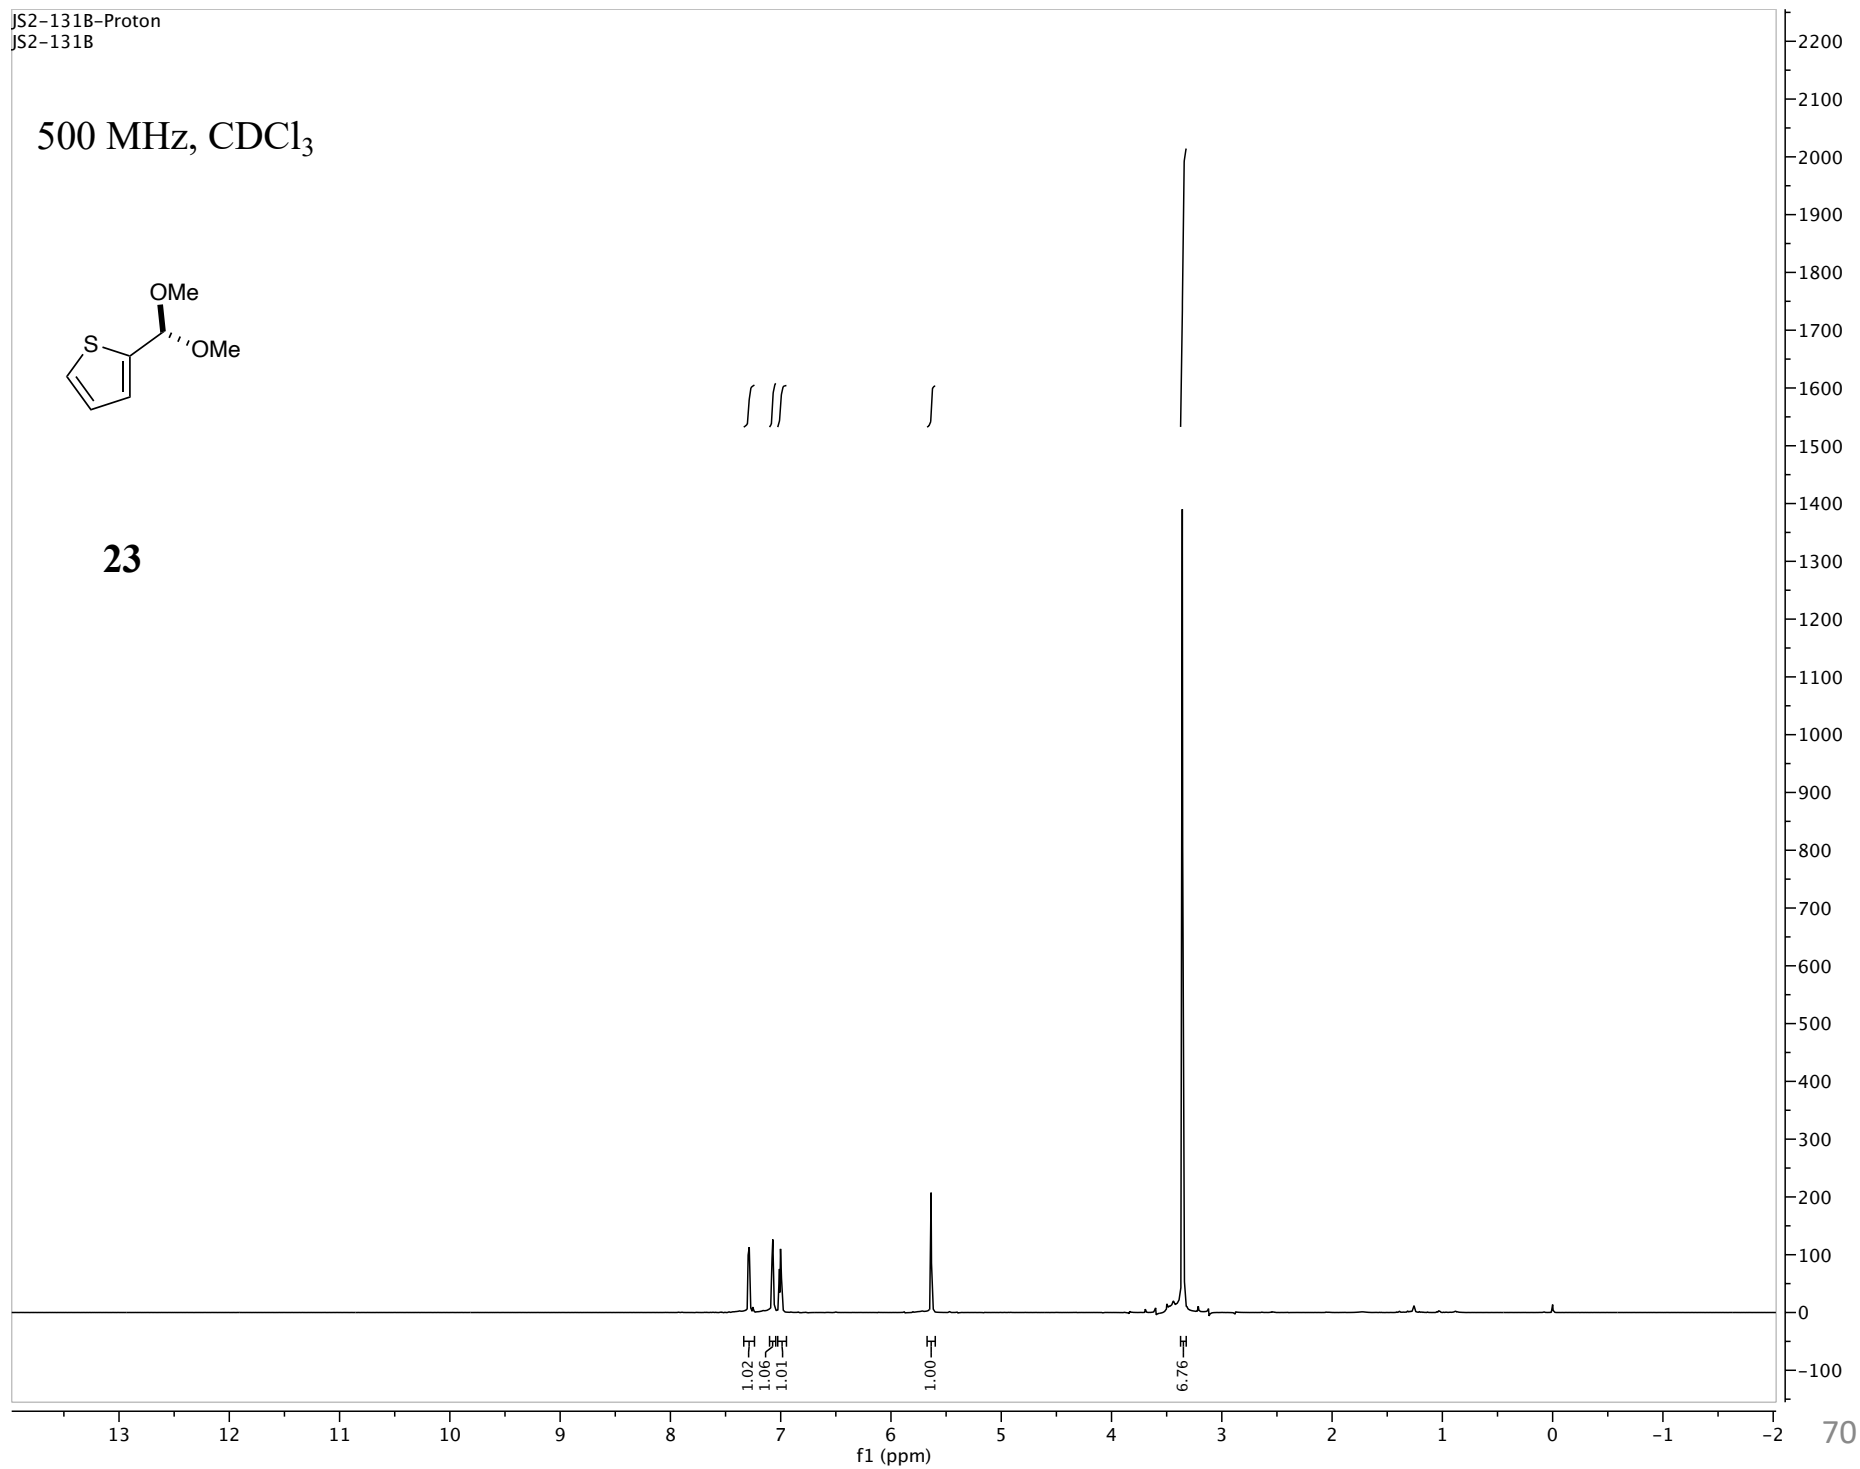

JS2-131B-Carbon  
JS2-131B

125 MHz, CDCl<sub>3</sub>

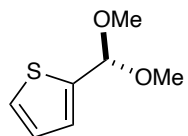

23

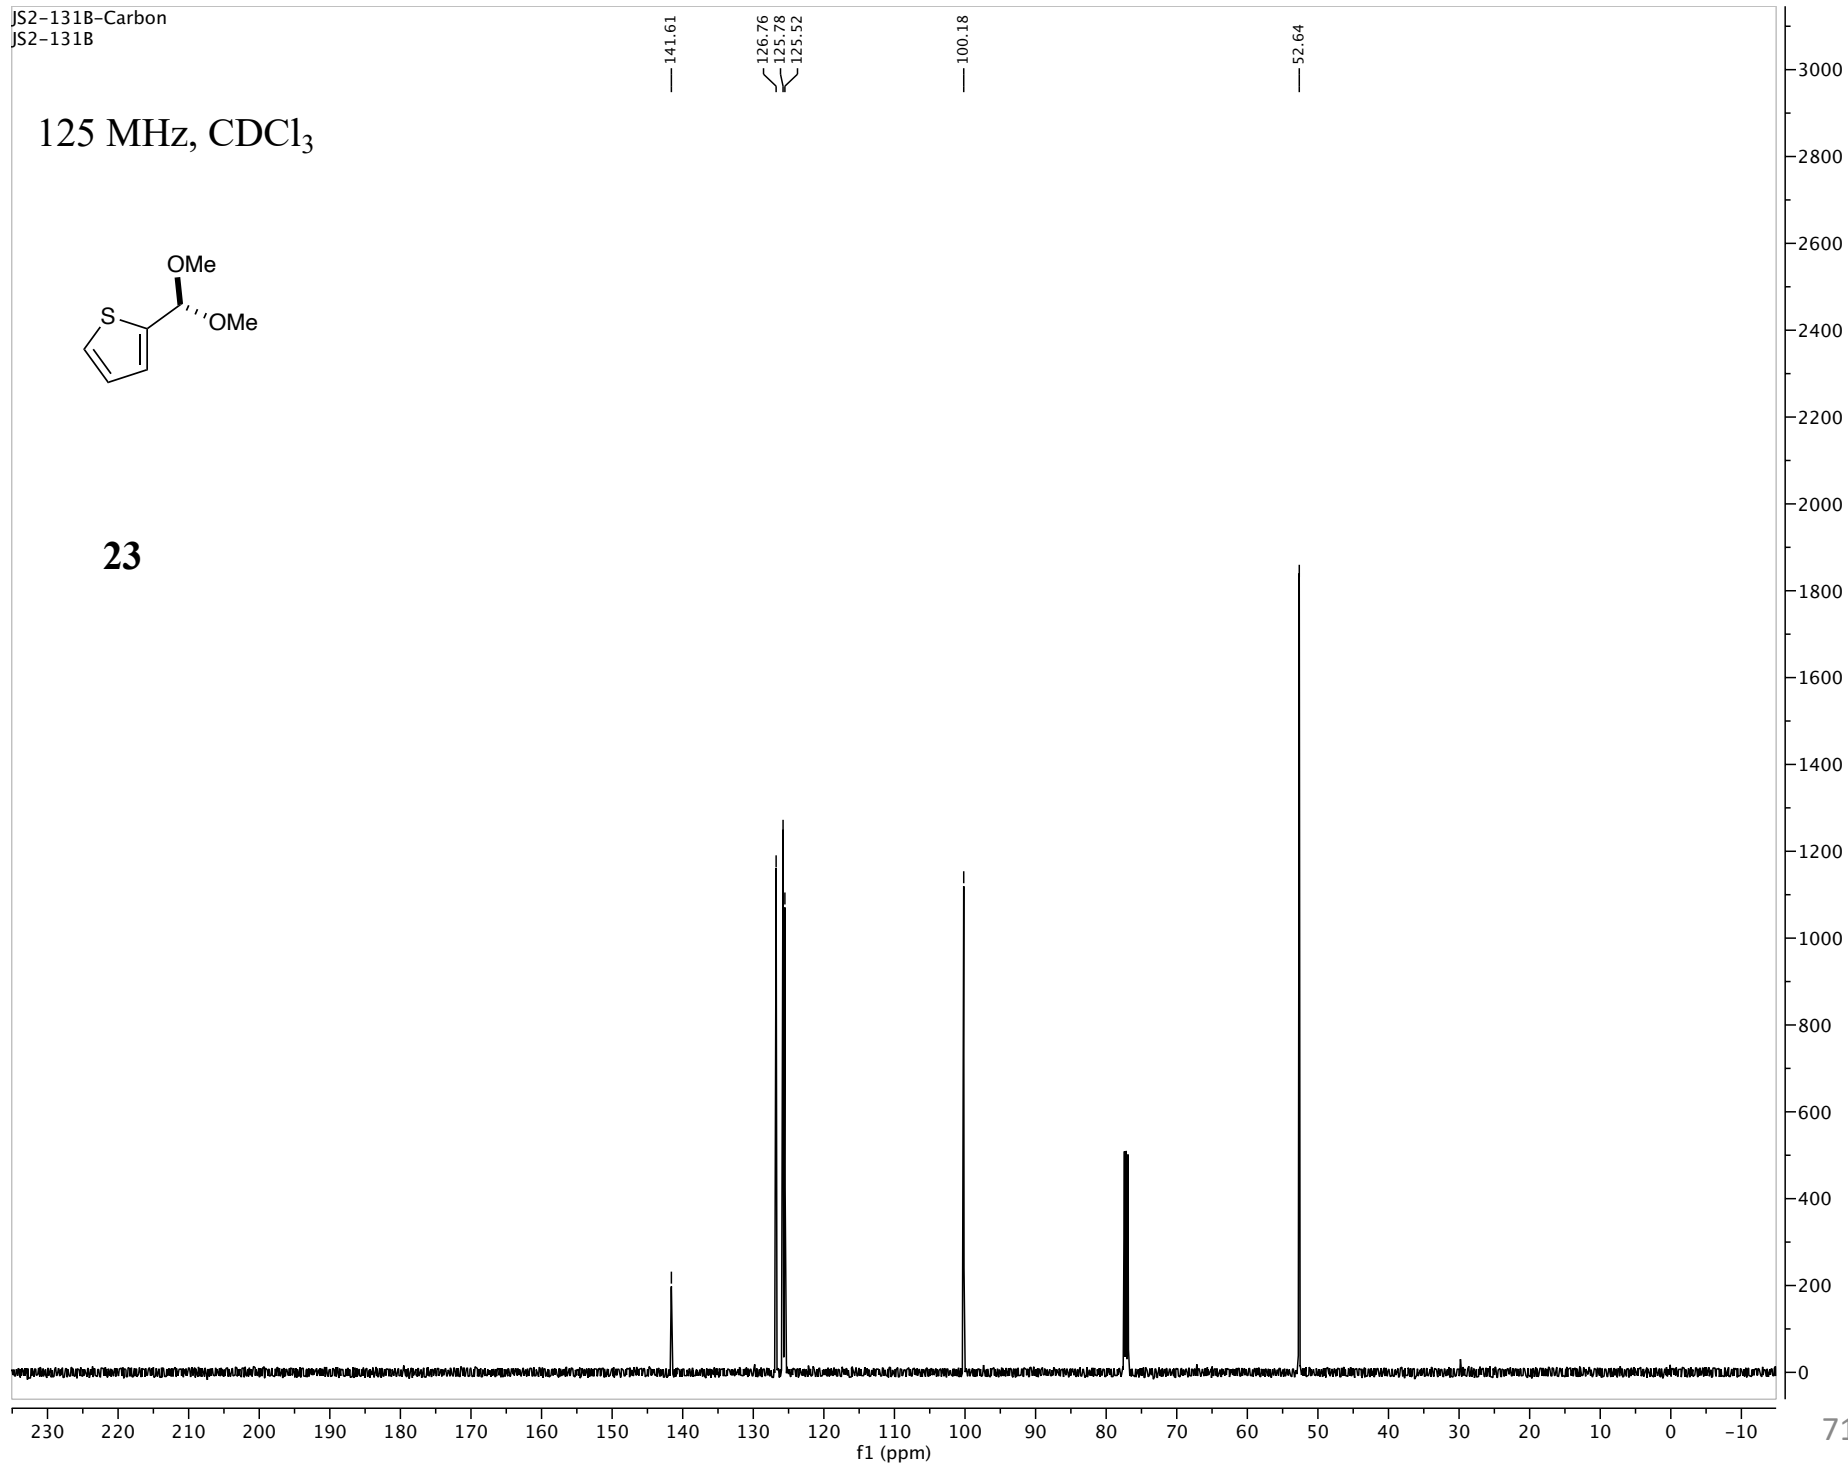

JS2-134-Proton  
JS2-134

500 MHz, CDCl<sub>3</sub>

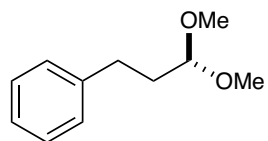

24

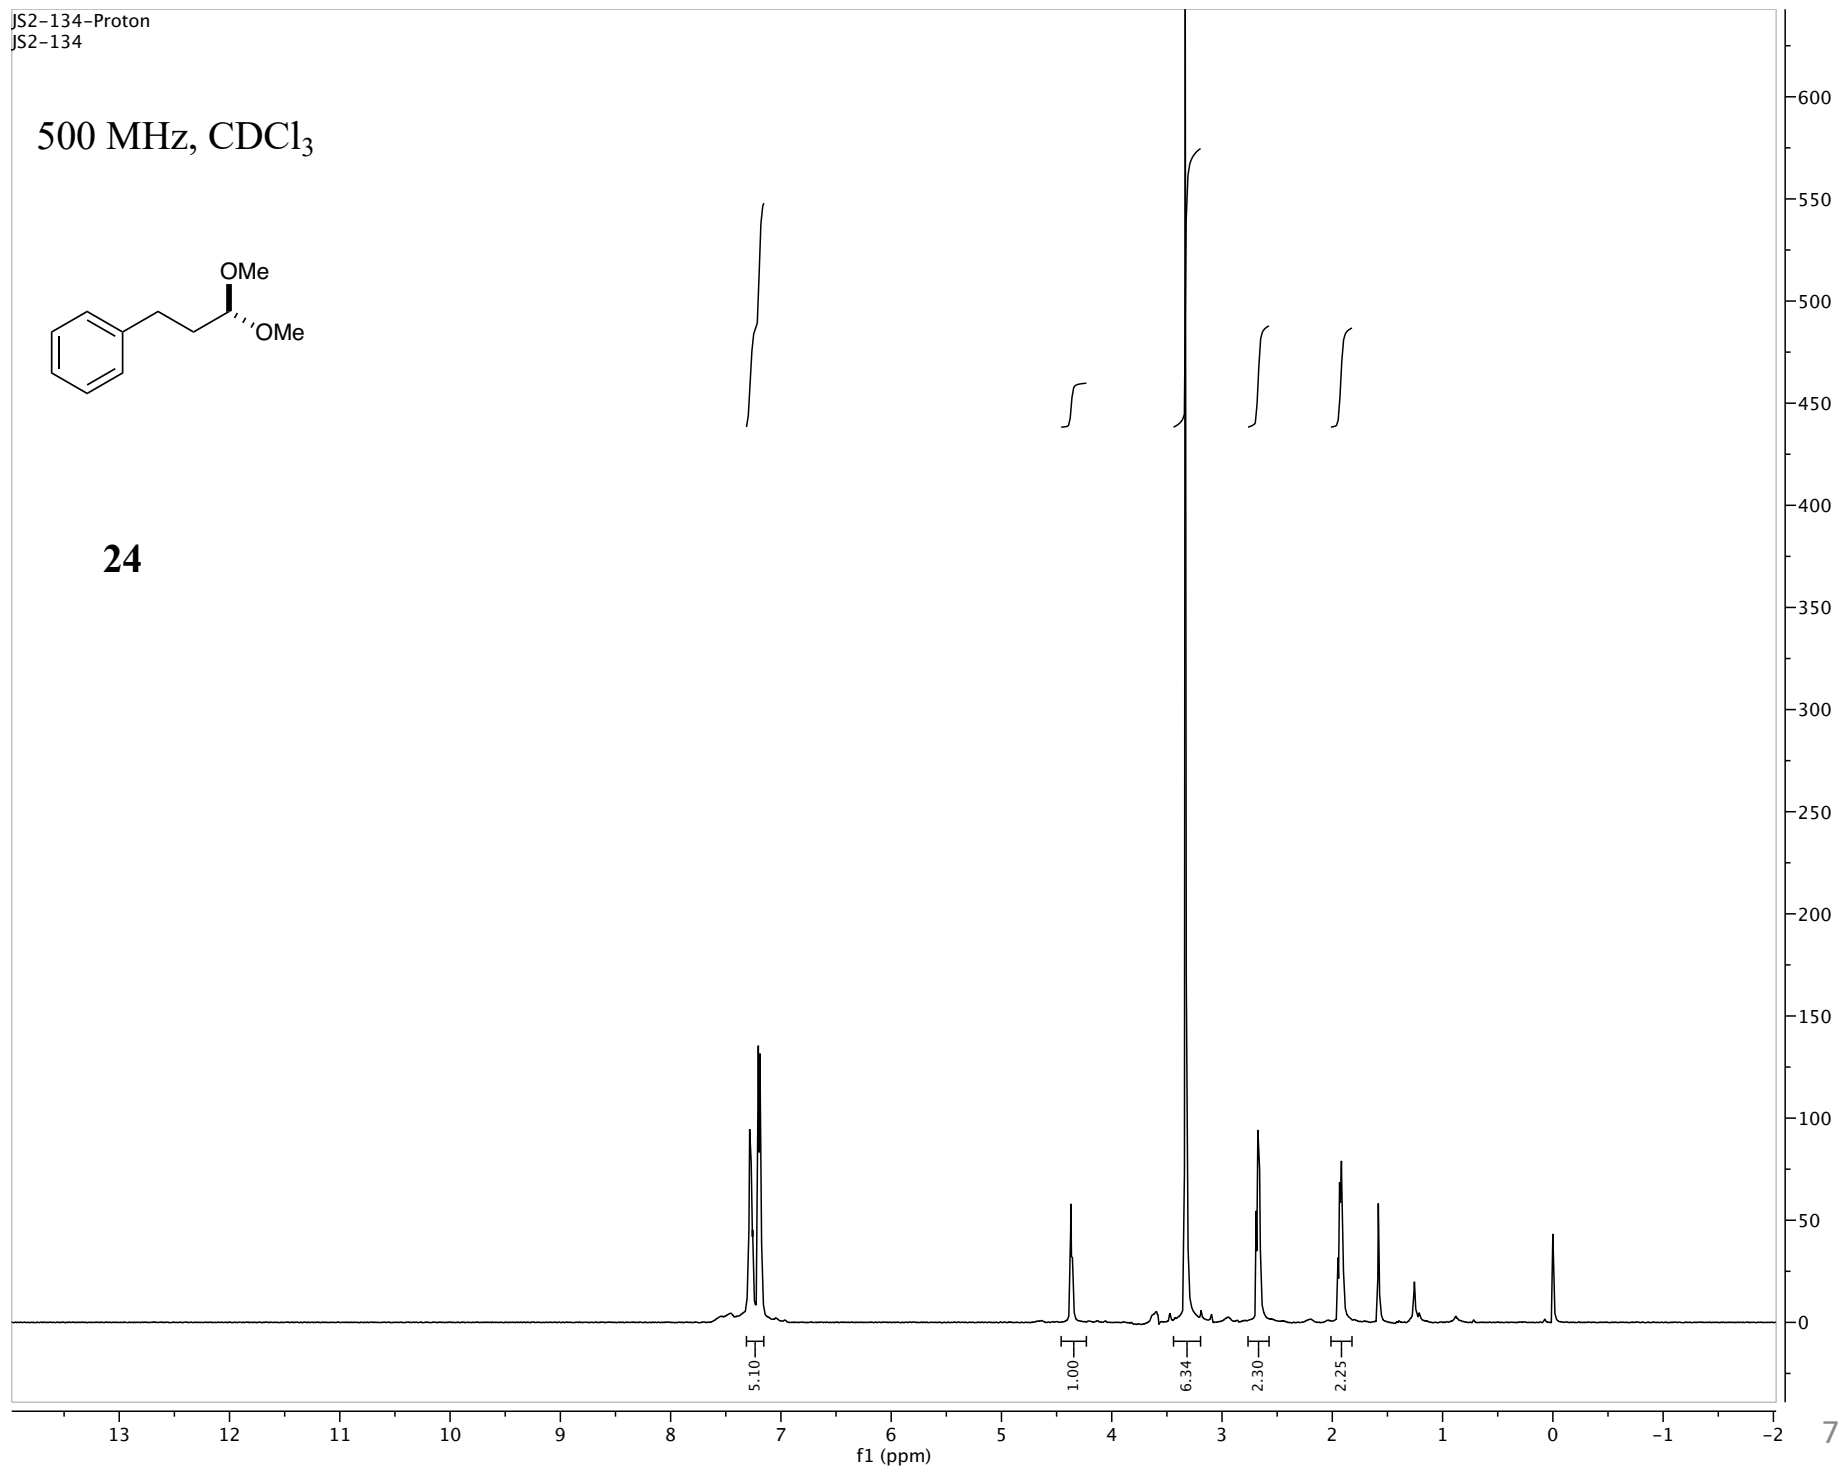



JS2-134-Carbon  
JS2-134

125 MHz, CDCl<sub>3</sub>

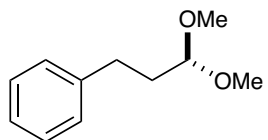

24

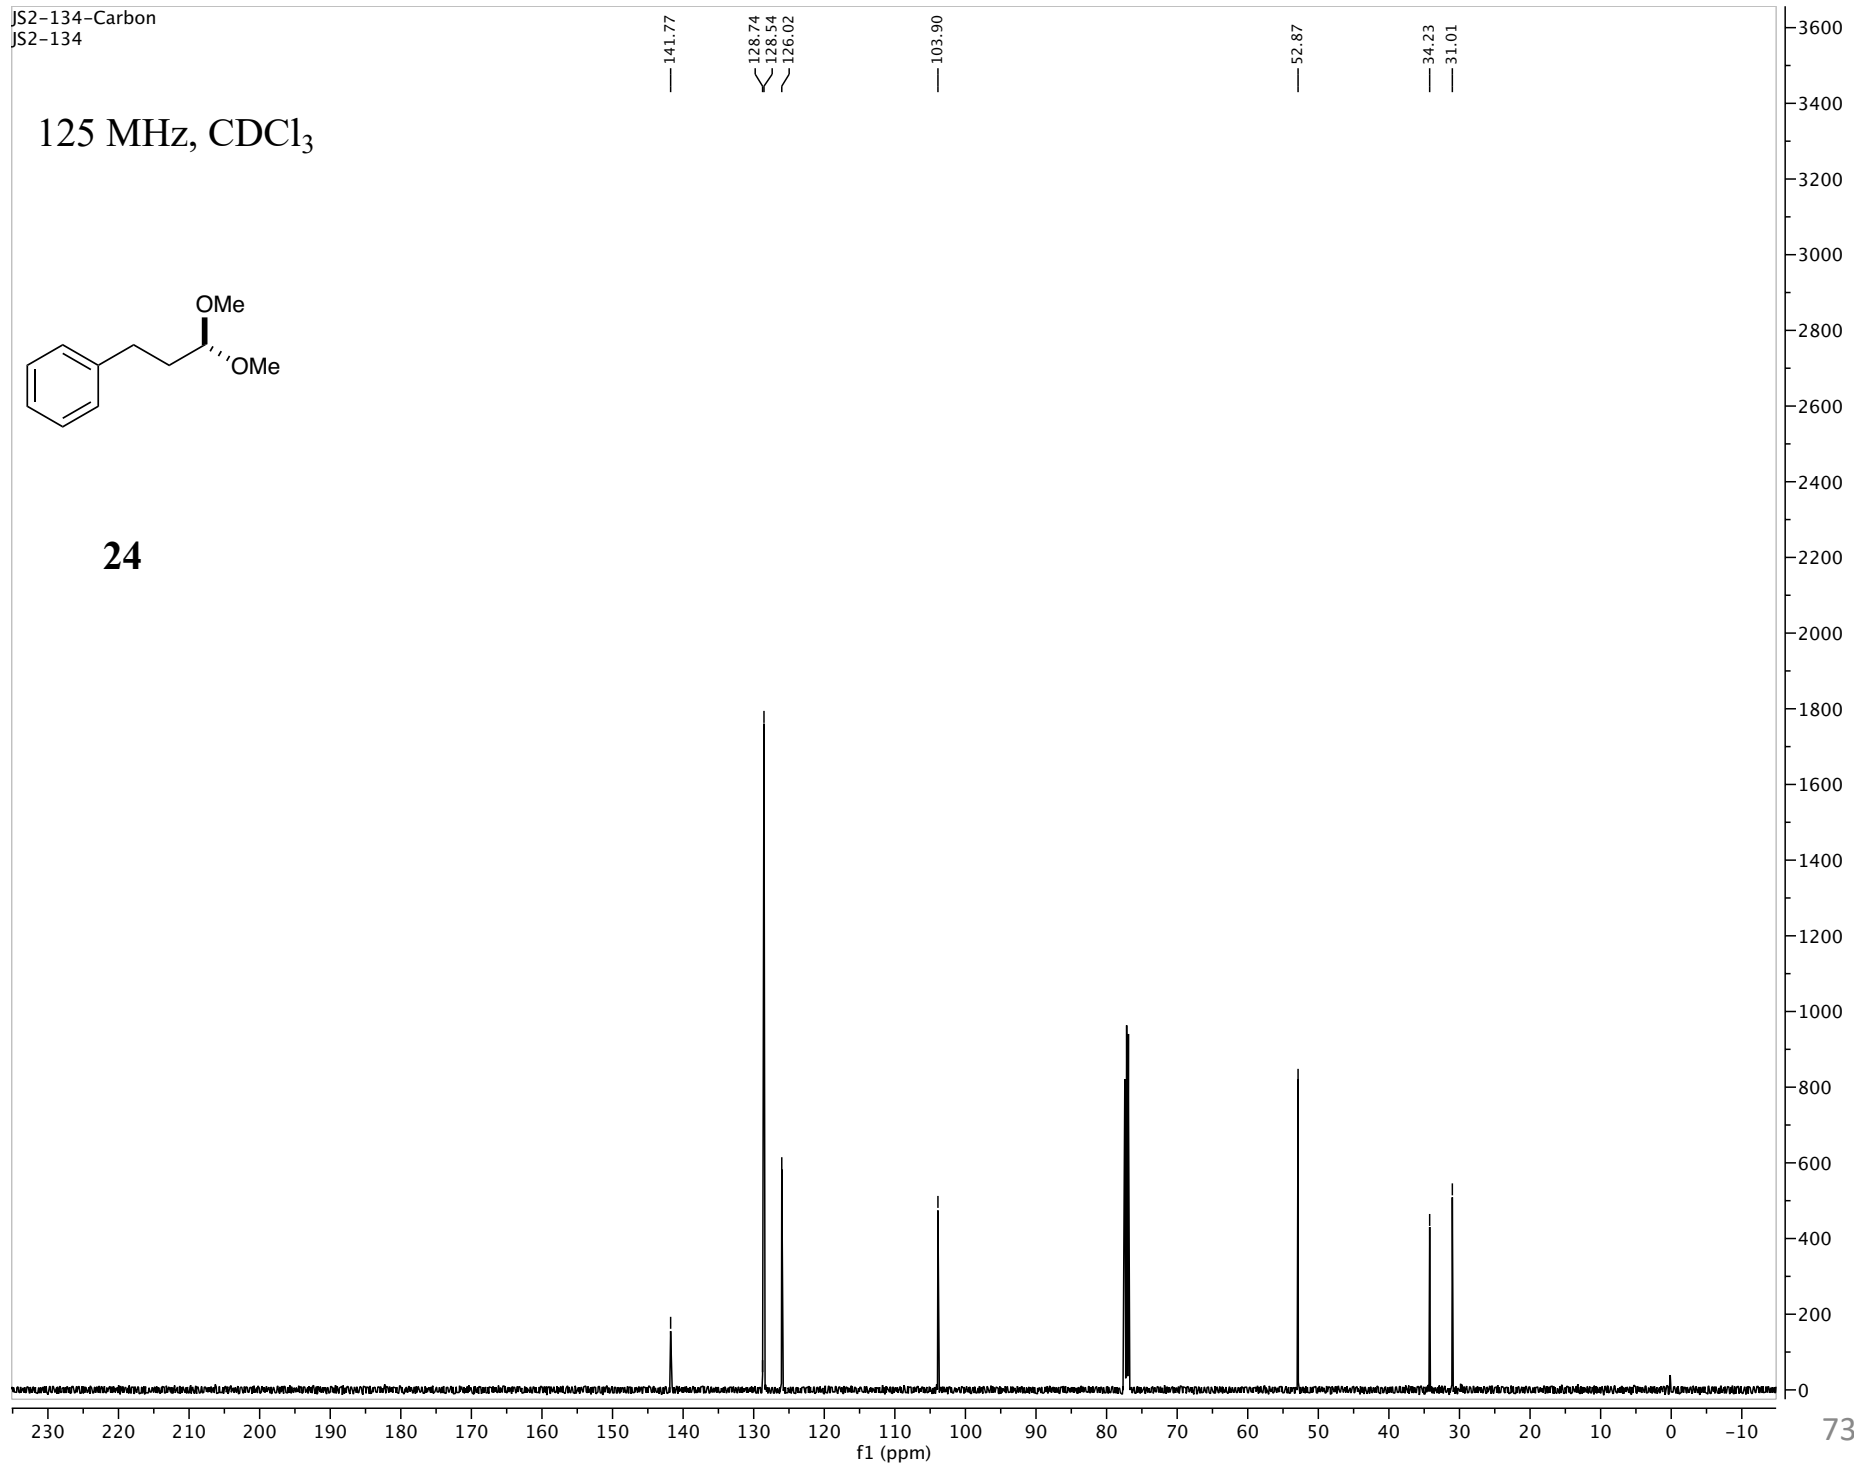

500 MHz, CDCl<sub>3</sub>

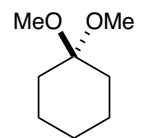

25

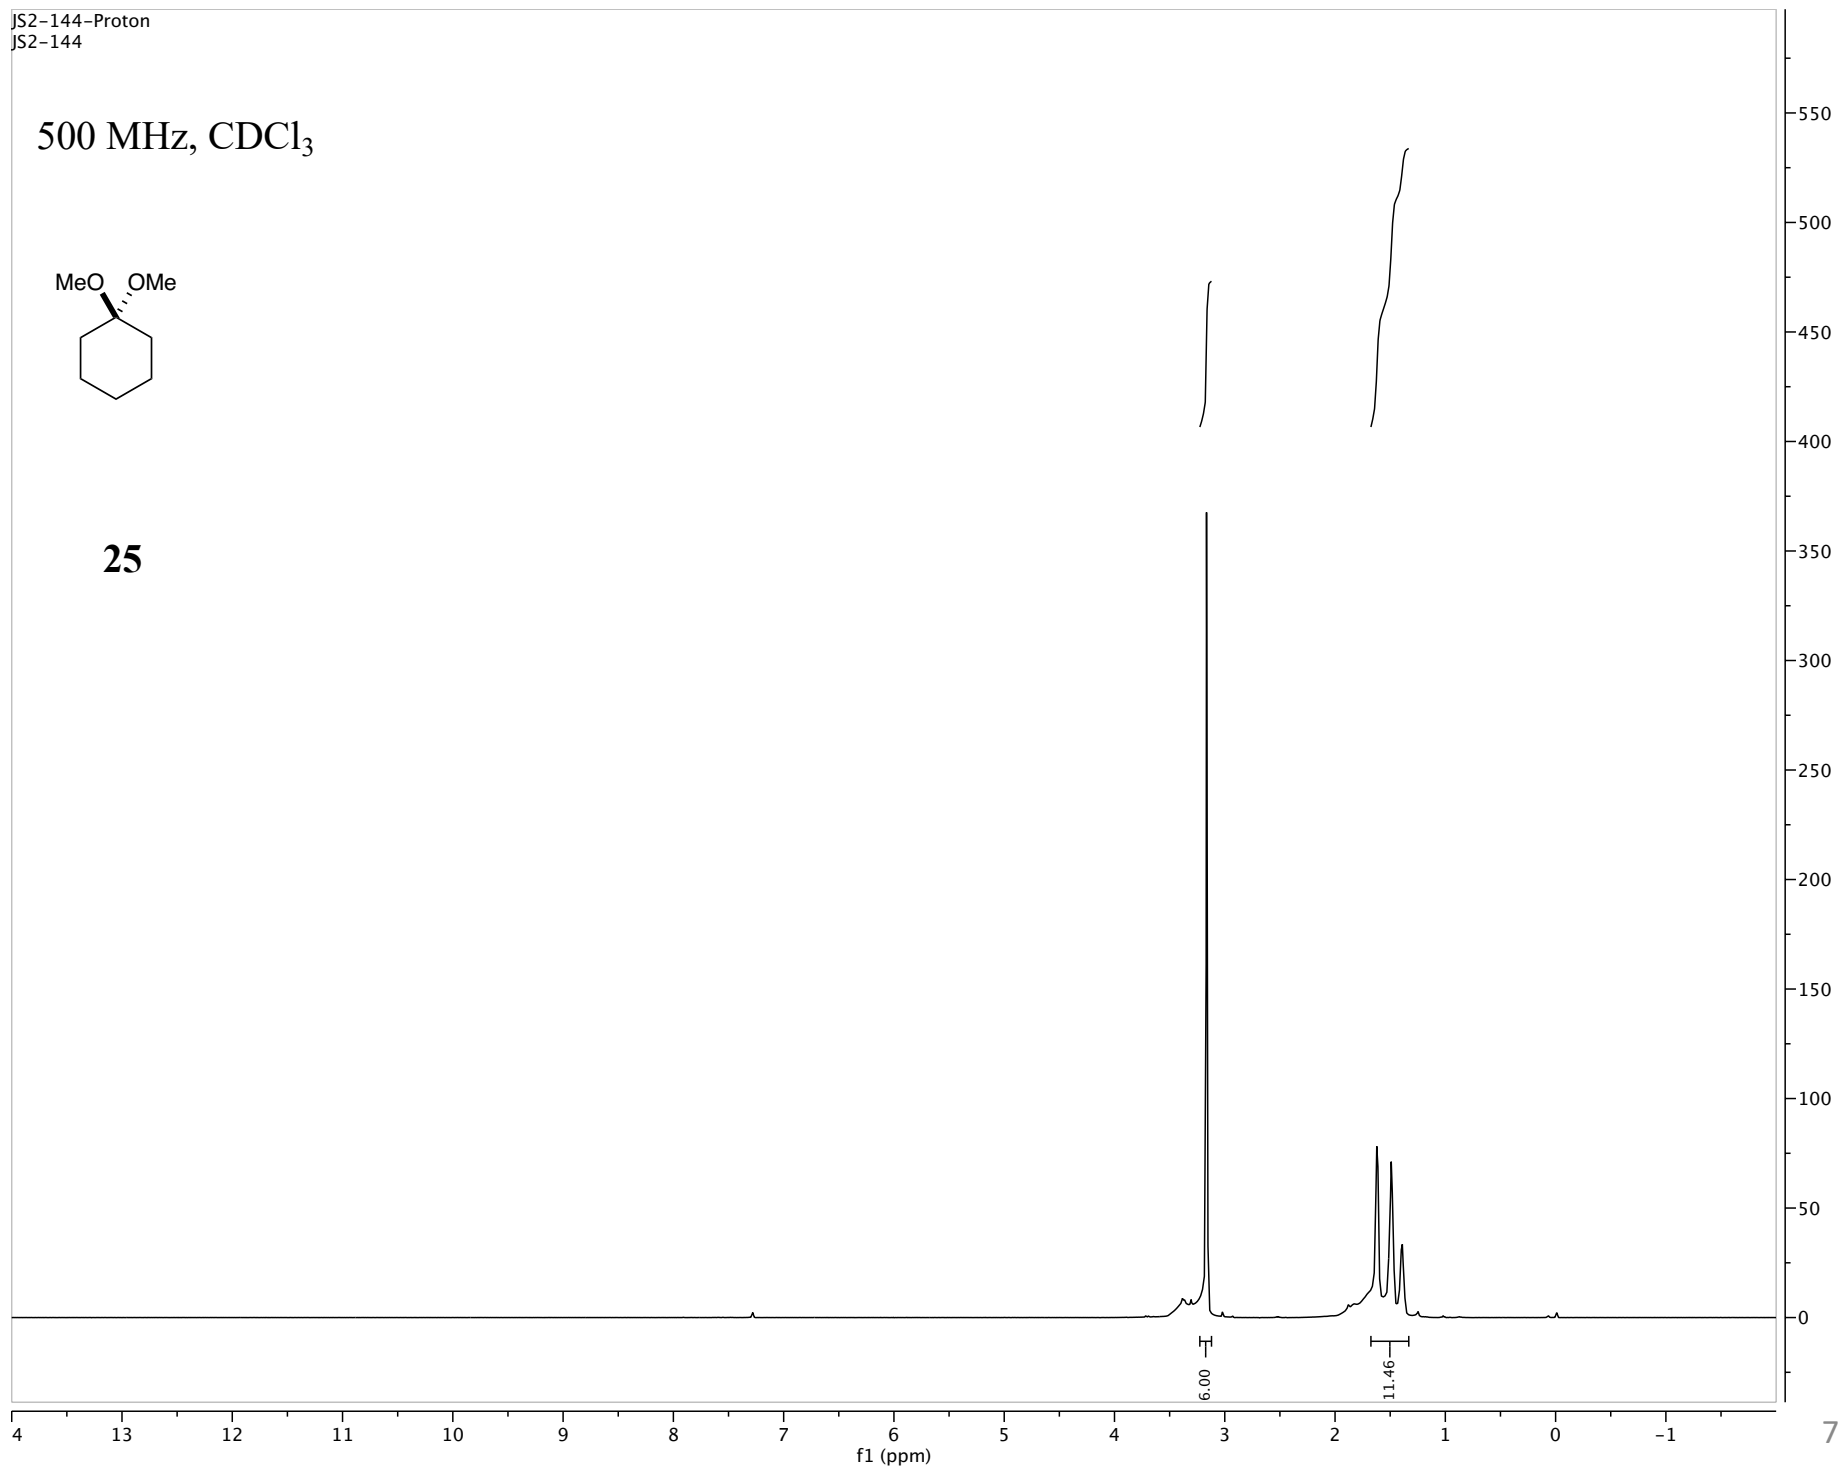

JS2-144-Carbon  
JS2-144

125 MHz, CDCl<sub>3</sub>

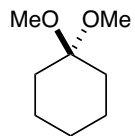

25

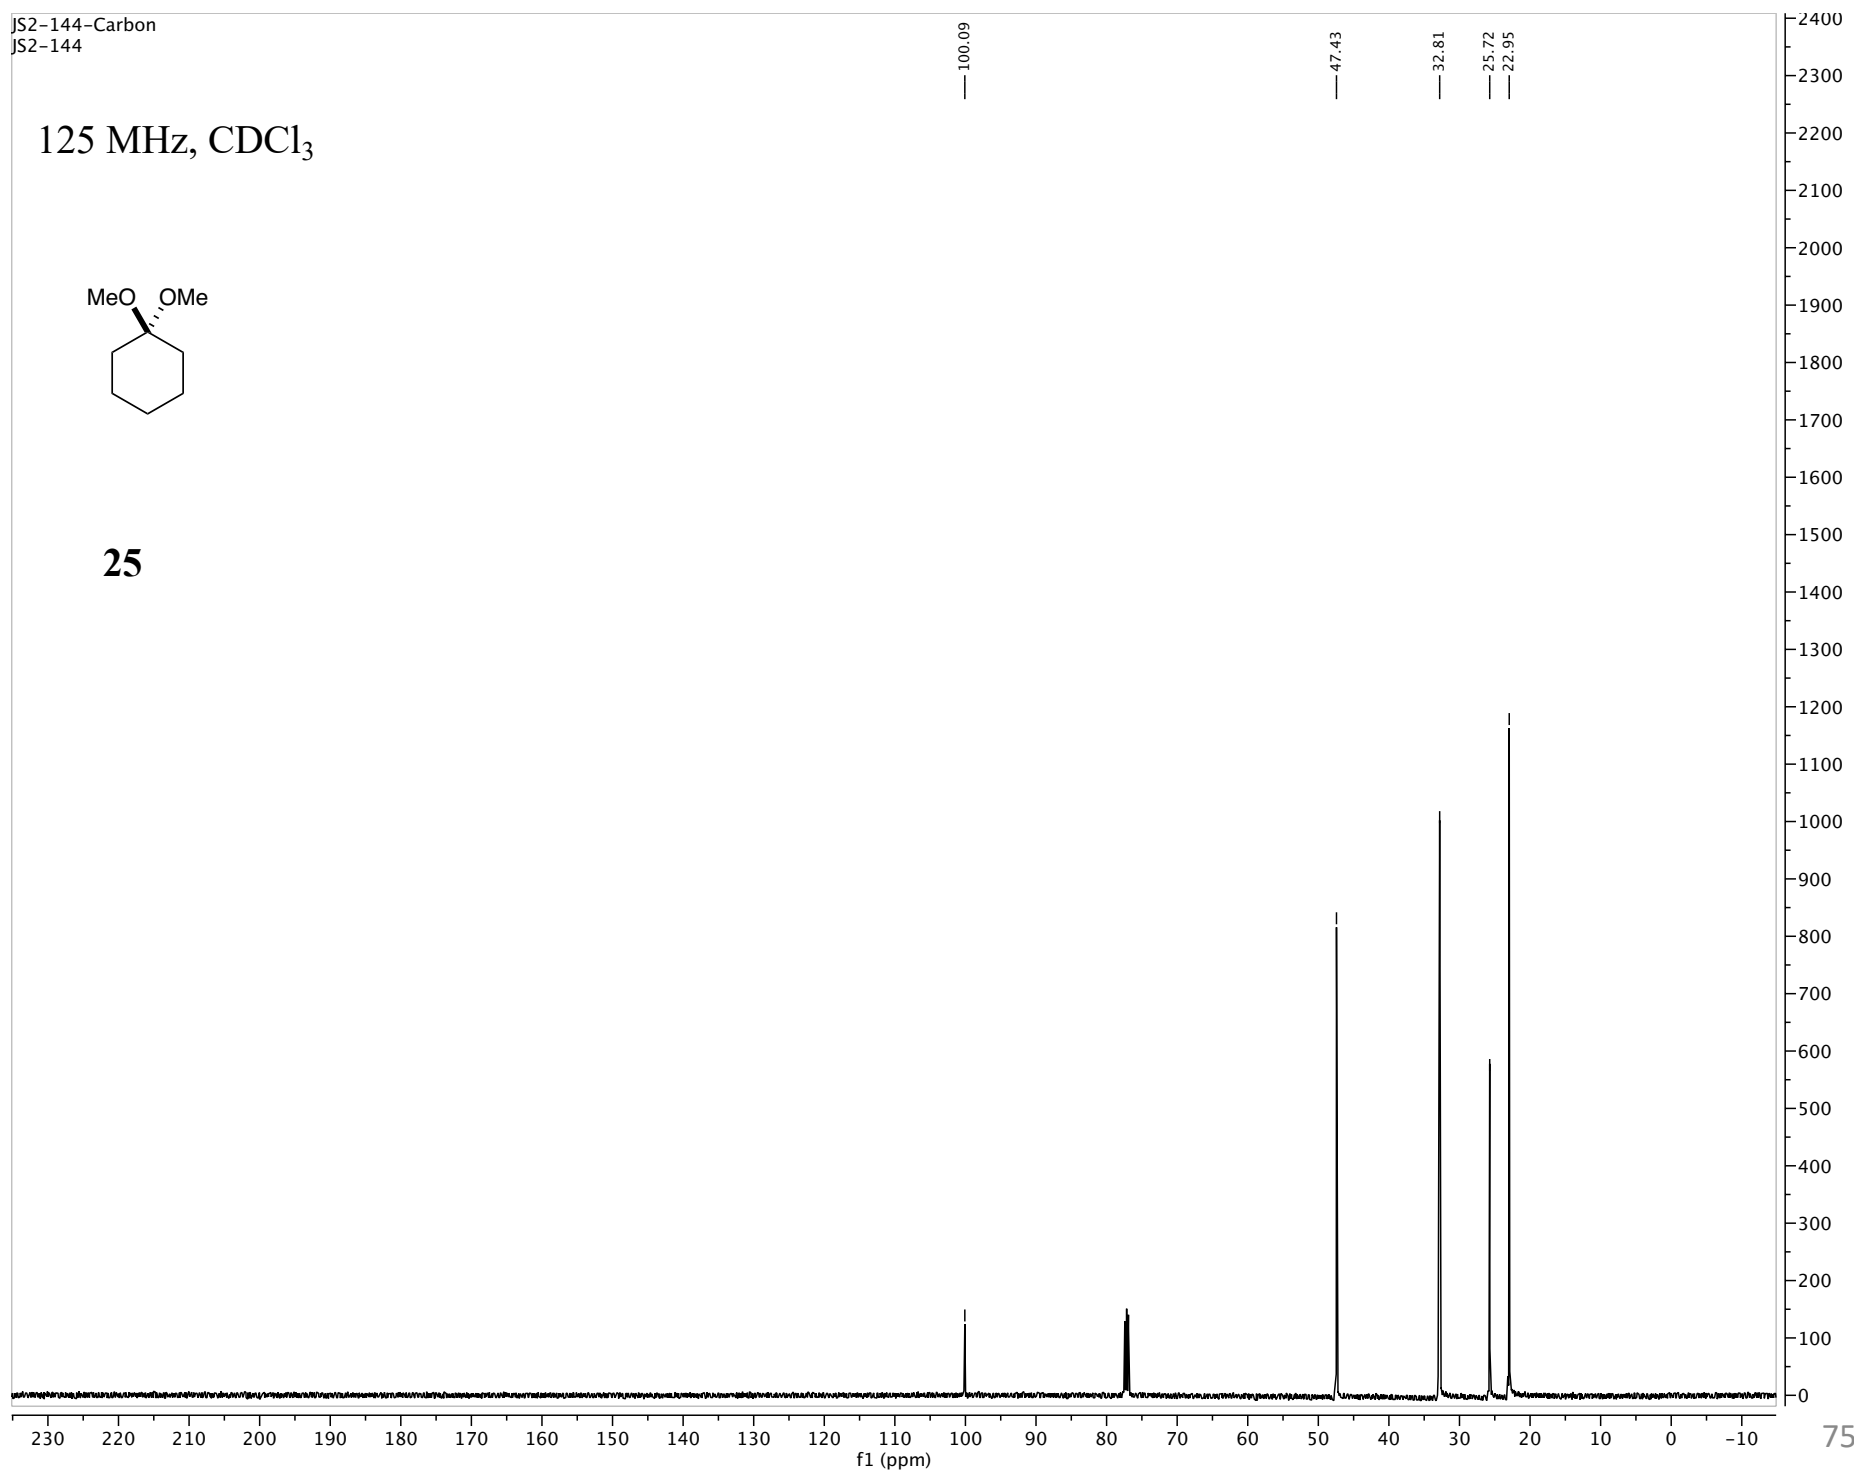

JS2-139-Proton  
JS2-139

500 MHz, CDCl<sub>3</sub>

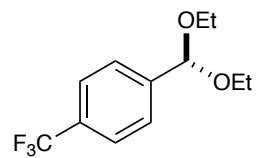

26

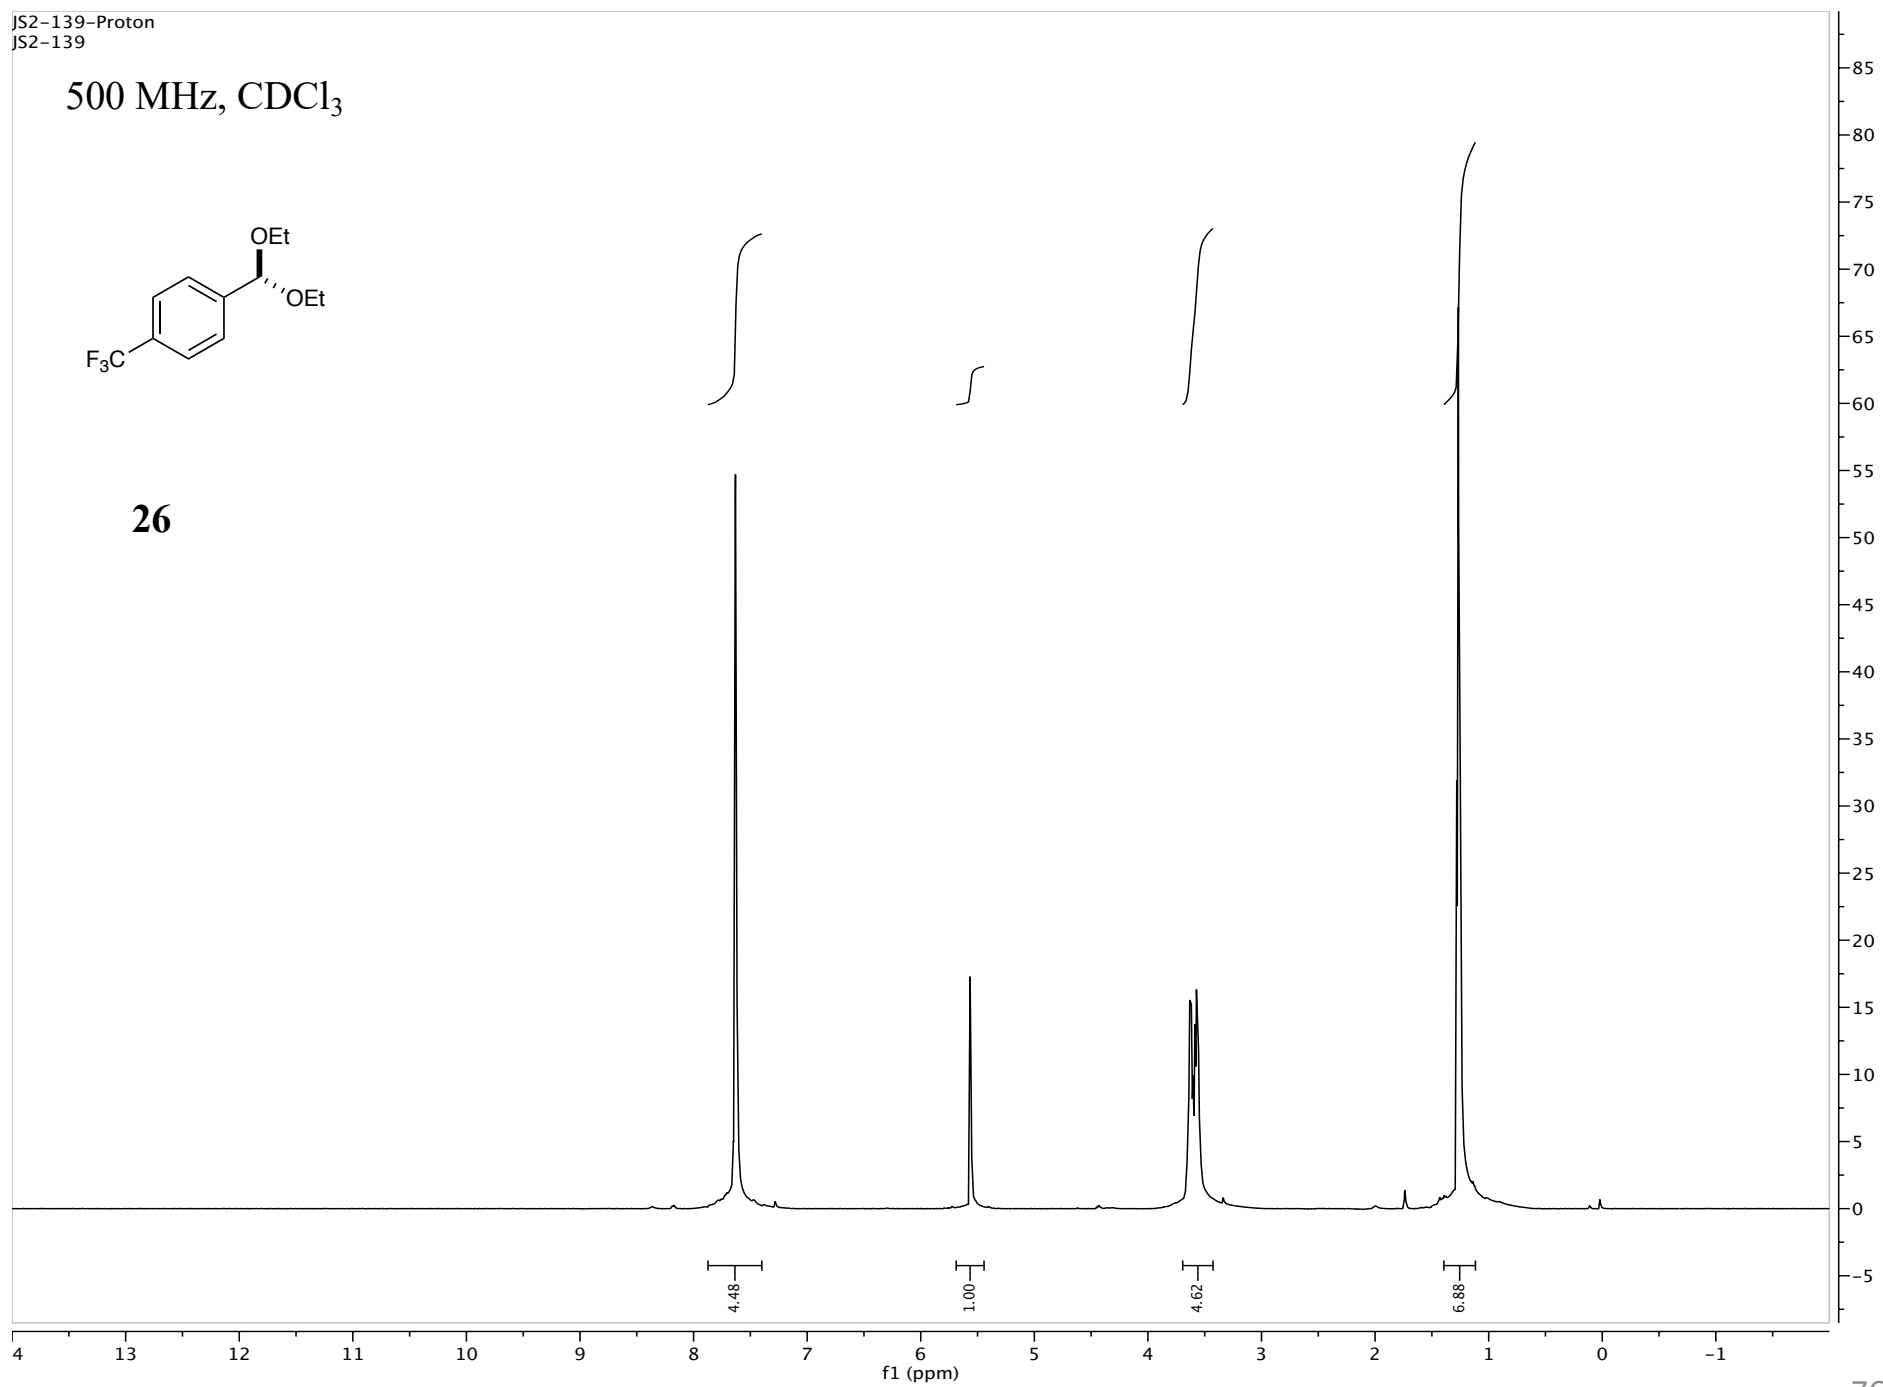

JS2-139-Carbon  
JS2-139

125 MHz, CDCl<sub>3</sub>

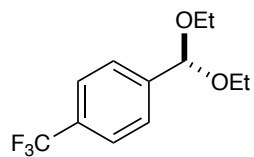

26

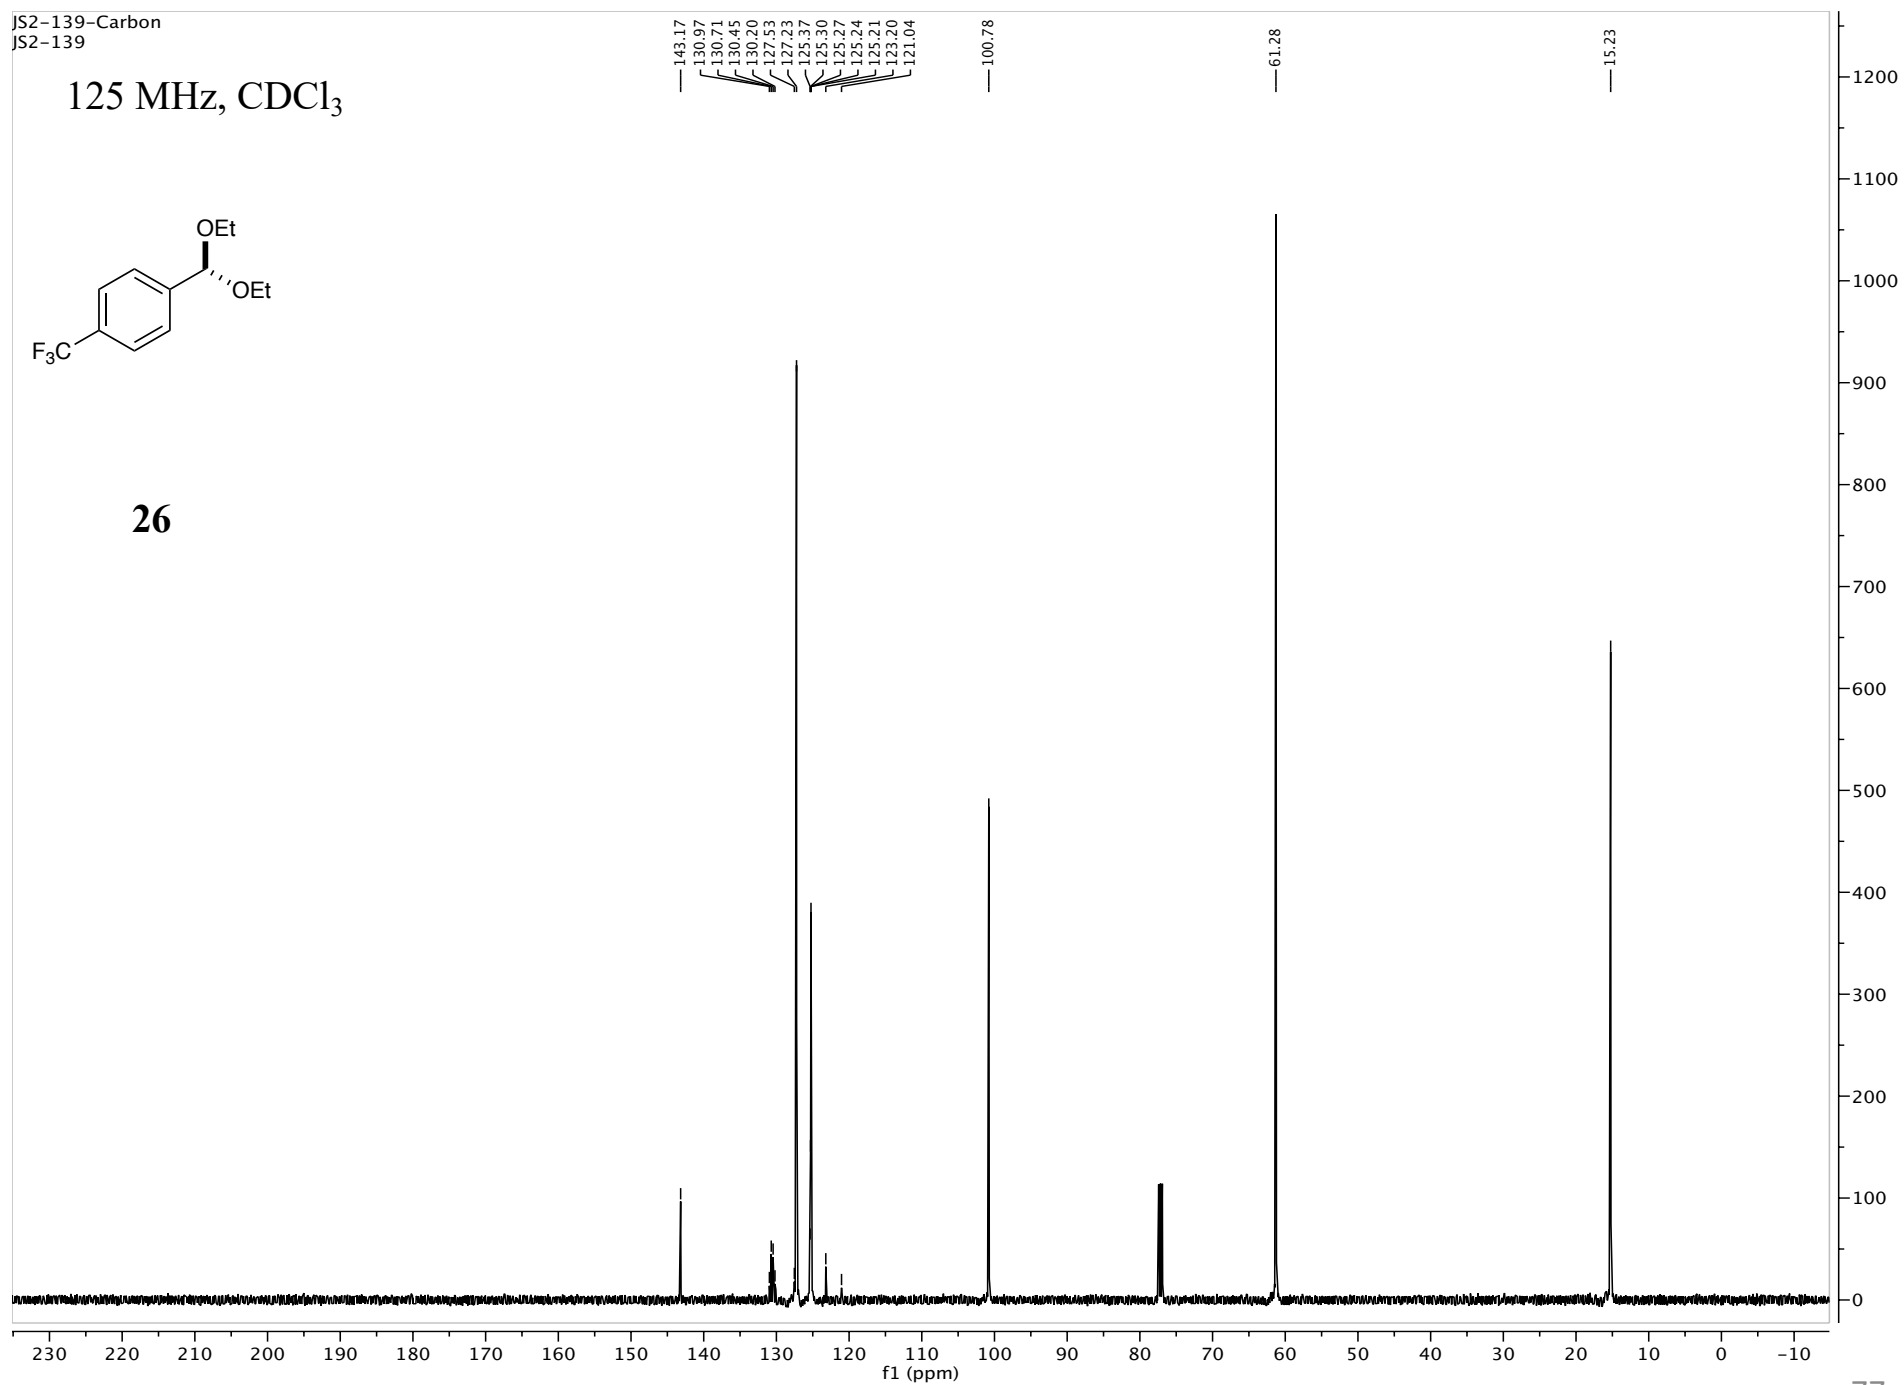

JS3-162-1-Proton  
JS3-162-Proton

500 MHz, CDCl<sub>3</sub>

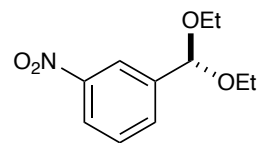

27

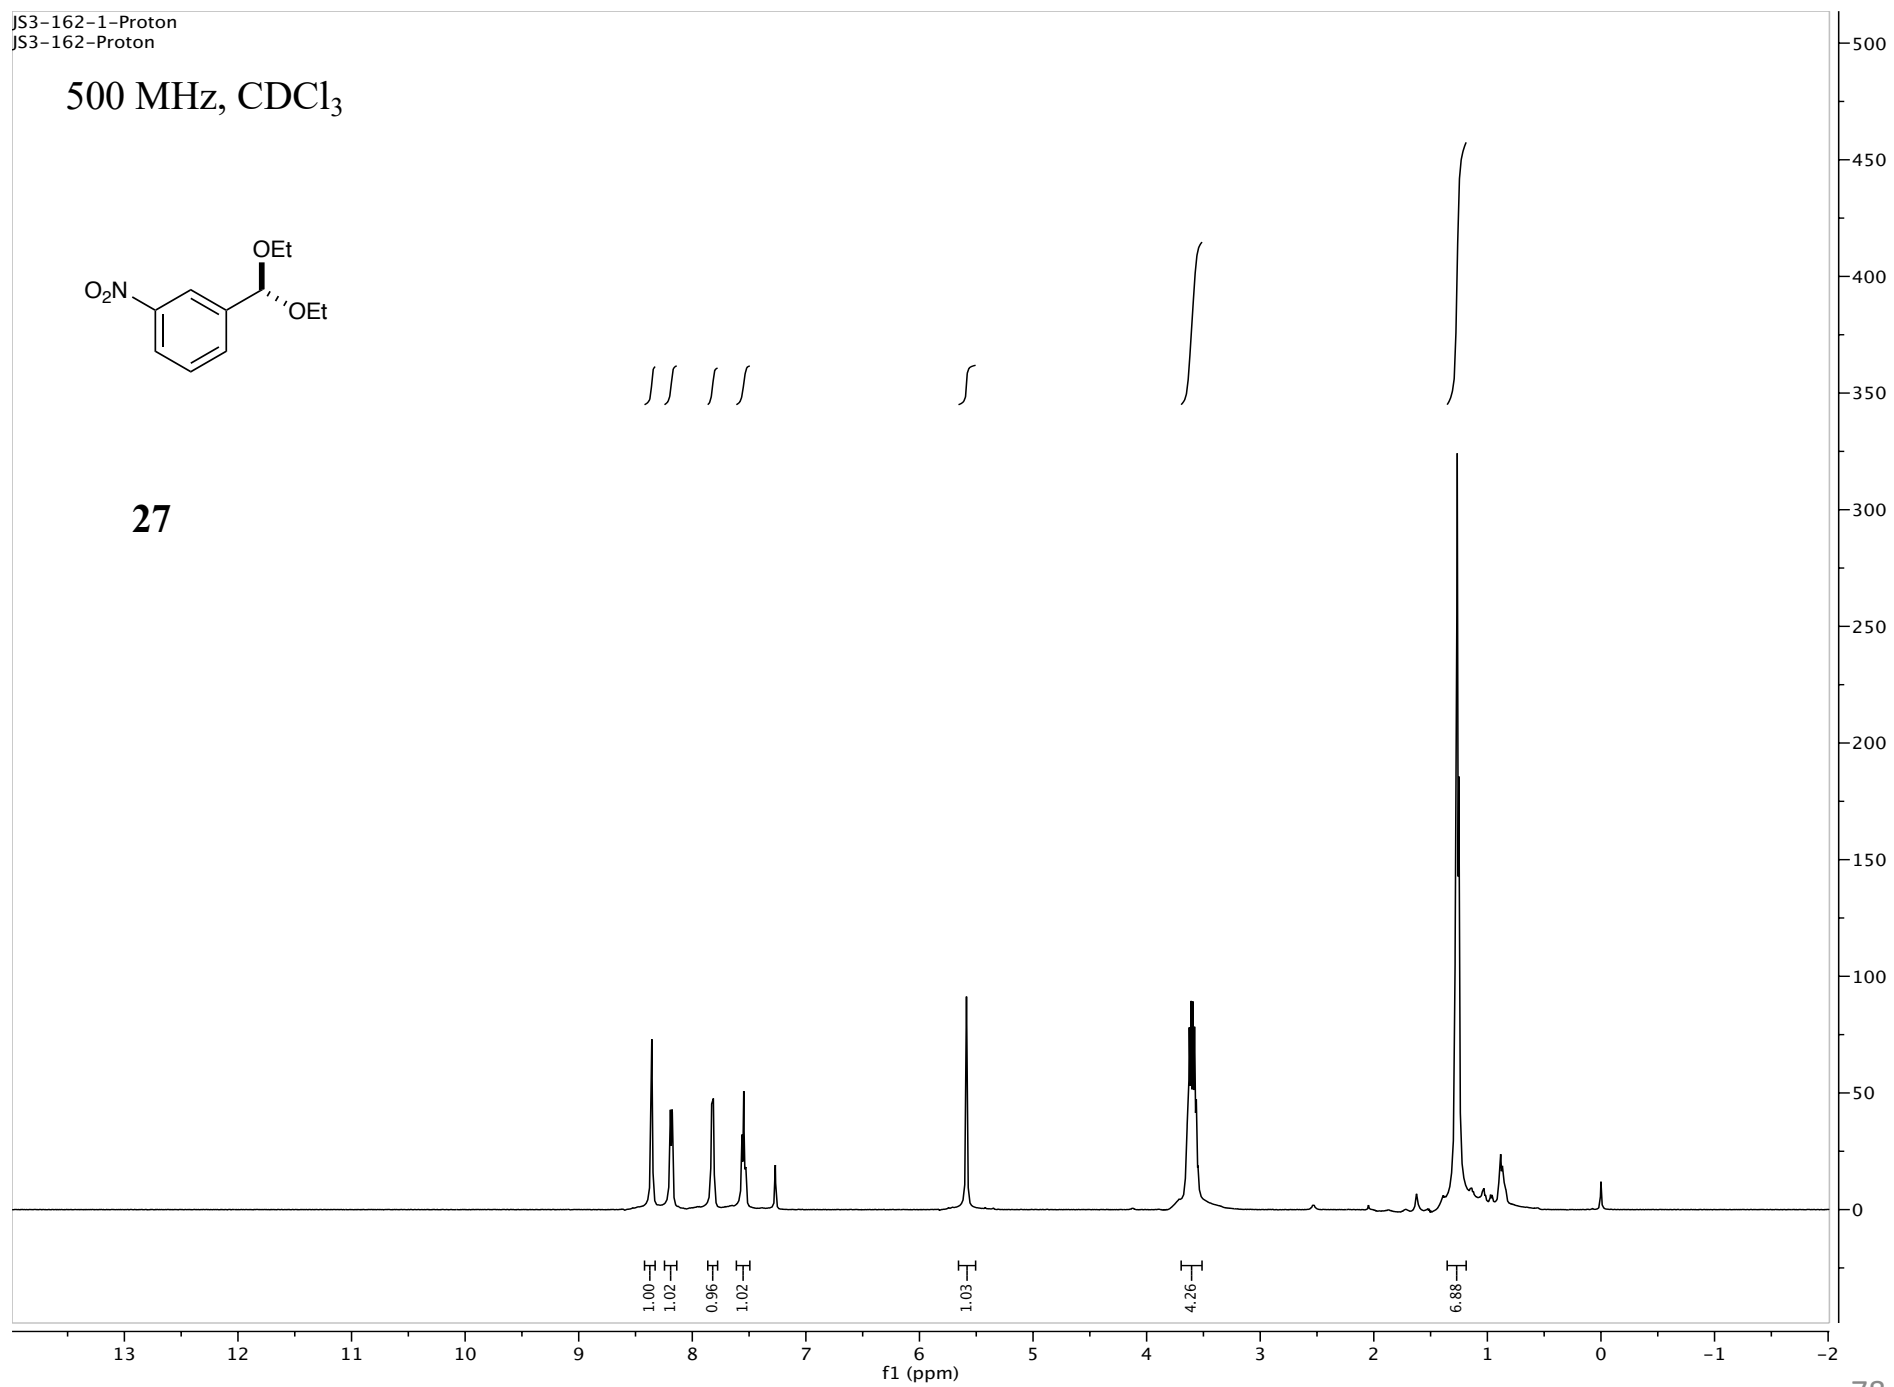

13-162-1-Carbon  
13-162-Proton

125 MHz, CDCl<sub>3</sub>

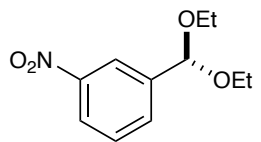

27

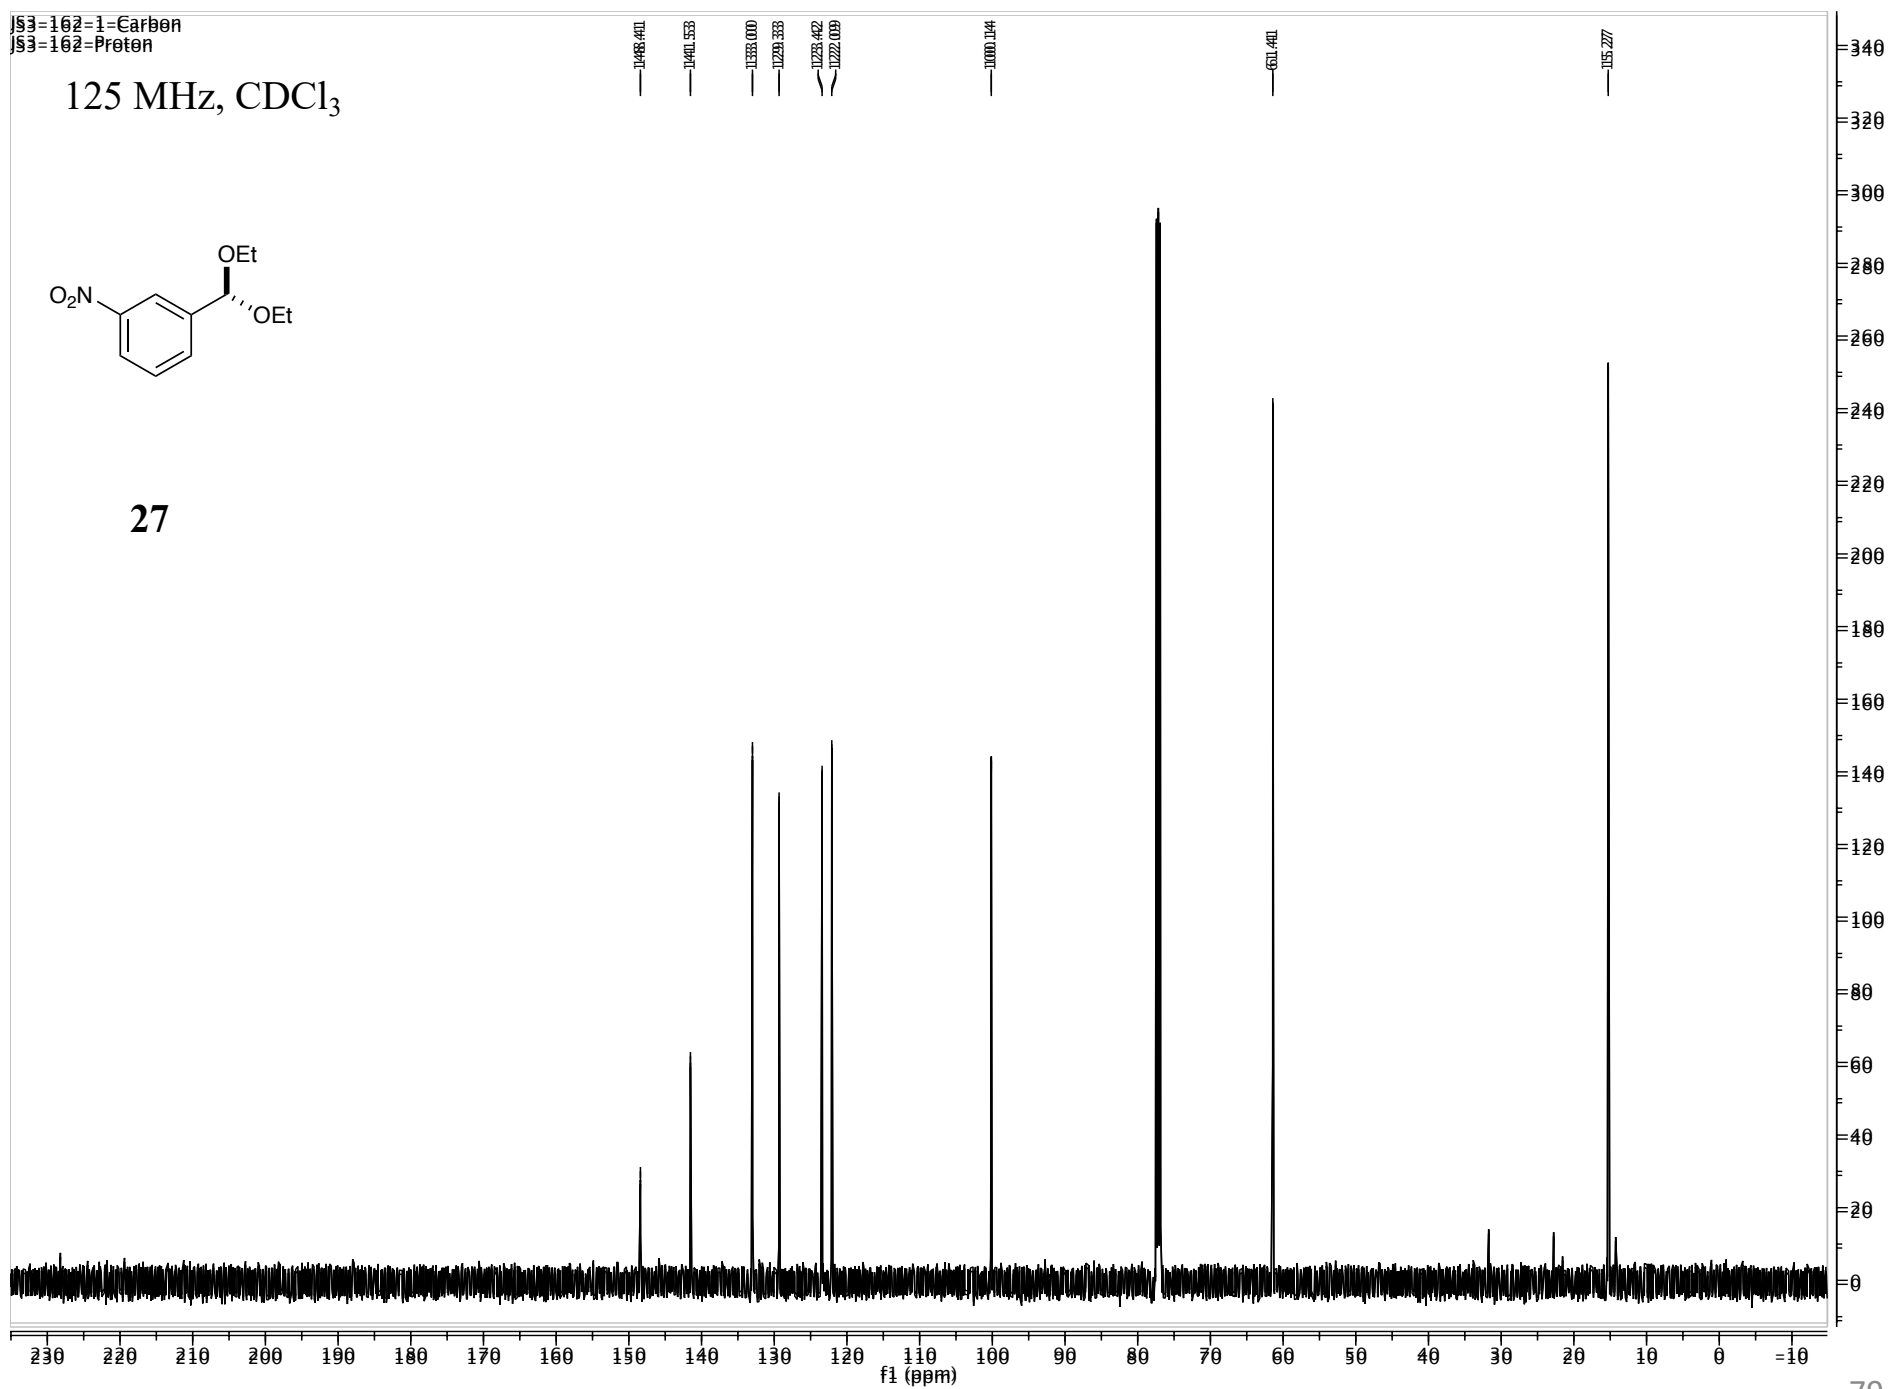

TFB-Glycol-Proton  
TFB-Glycol-Proton

500 MHz, CDCl<sub>3</sub>

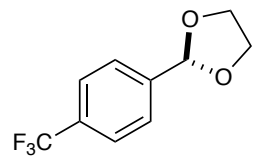

28

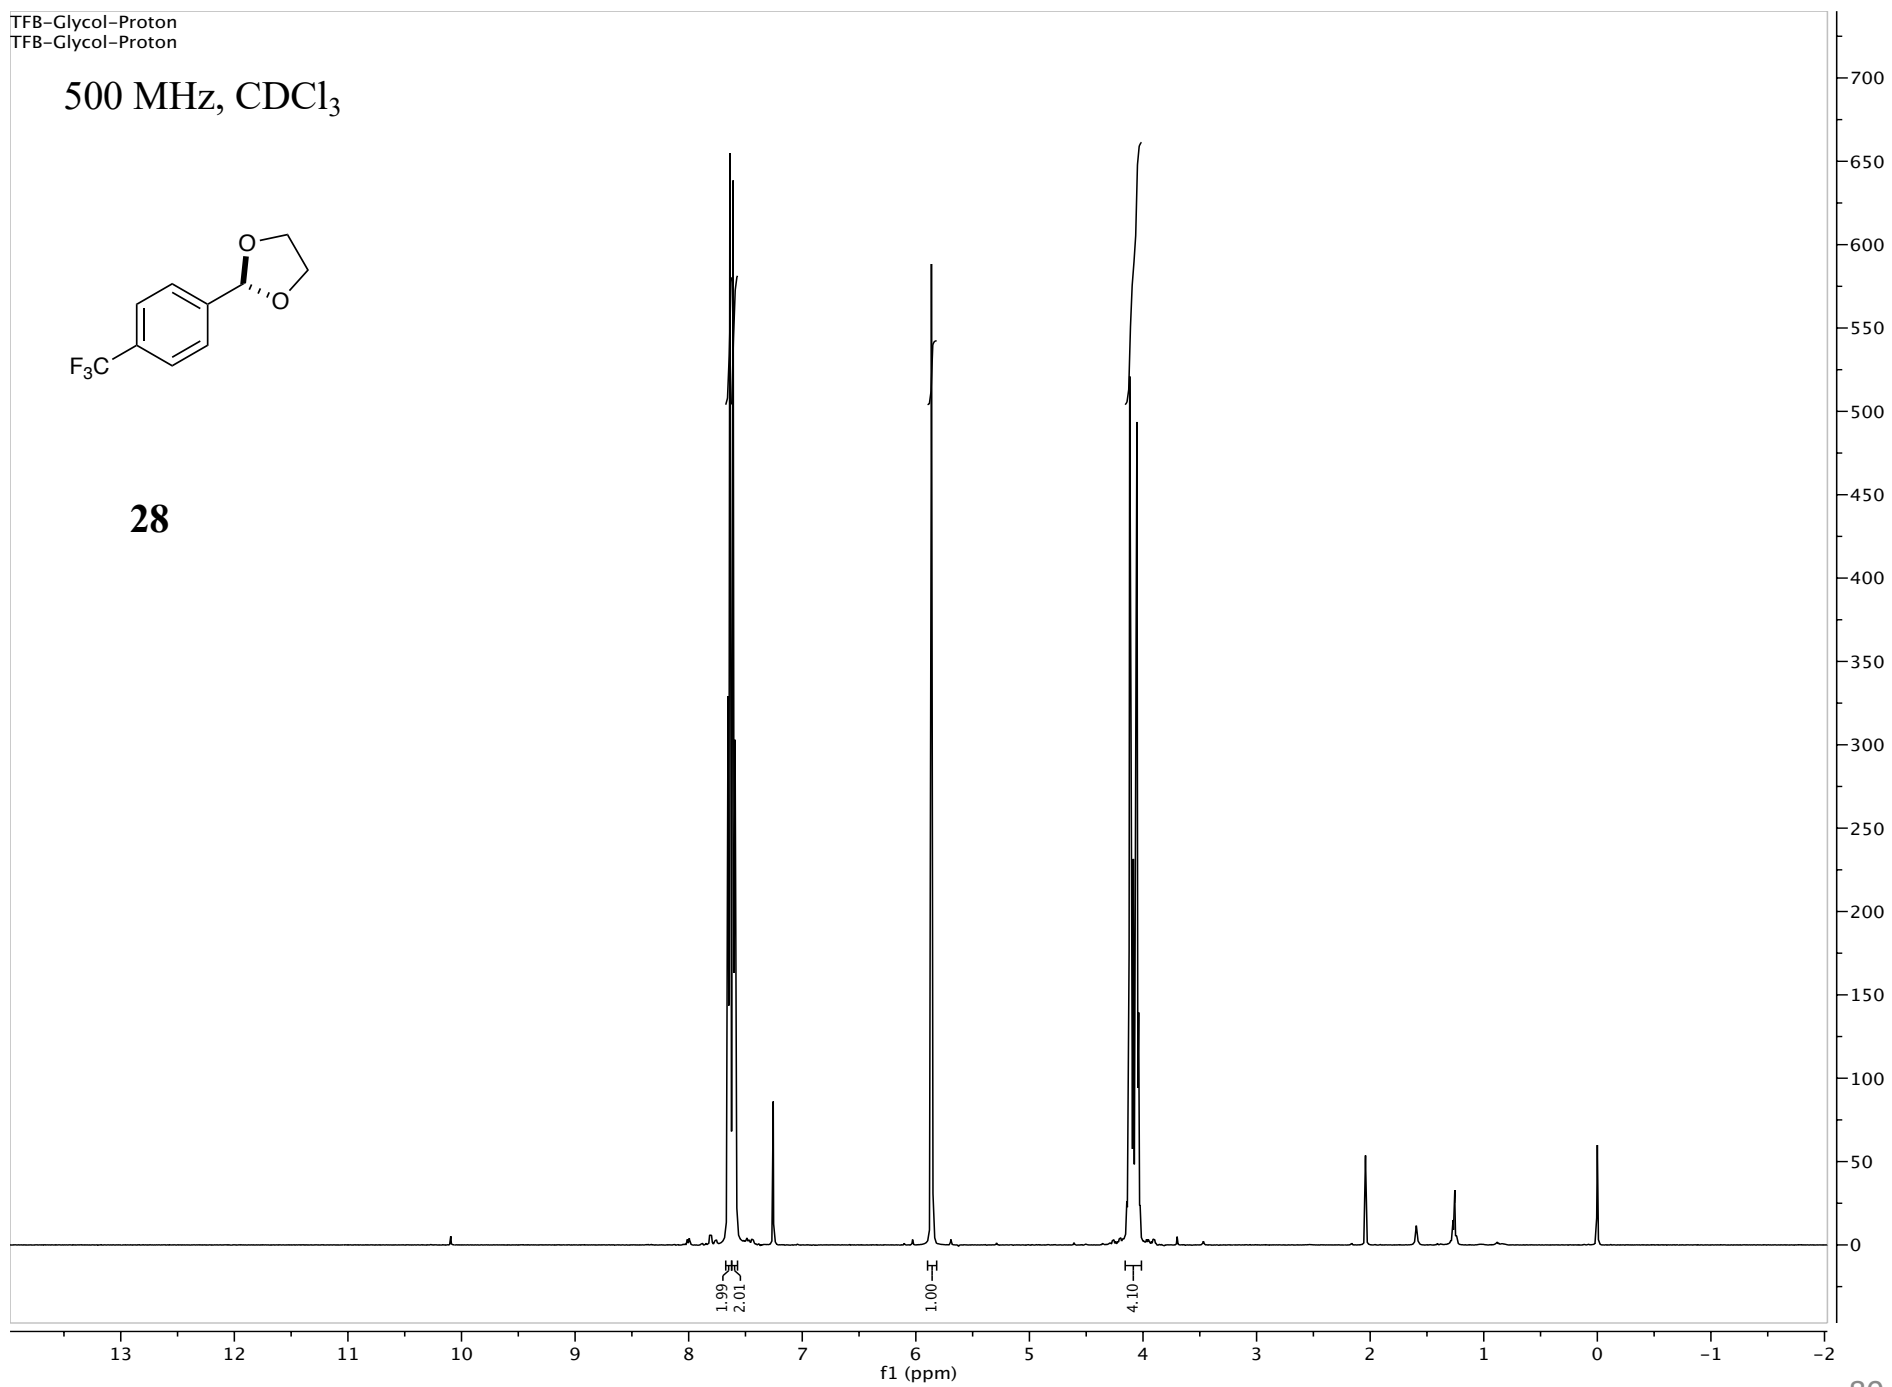



TFB-Glycol-Carbon  
TFB-Glycol-Proton

125 MHz, CDCl<sub>3</sub>

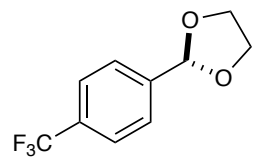

28

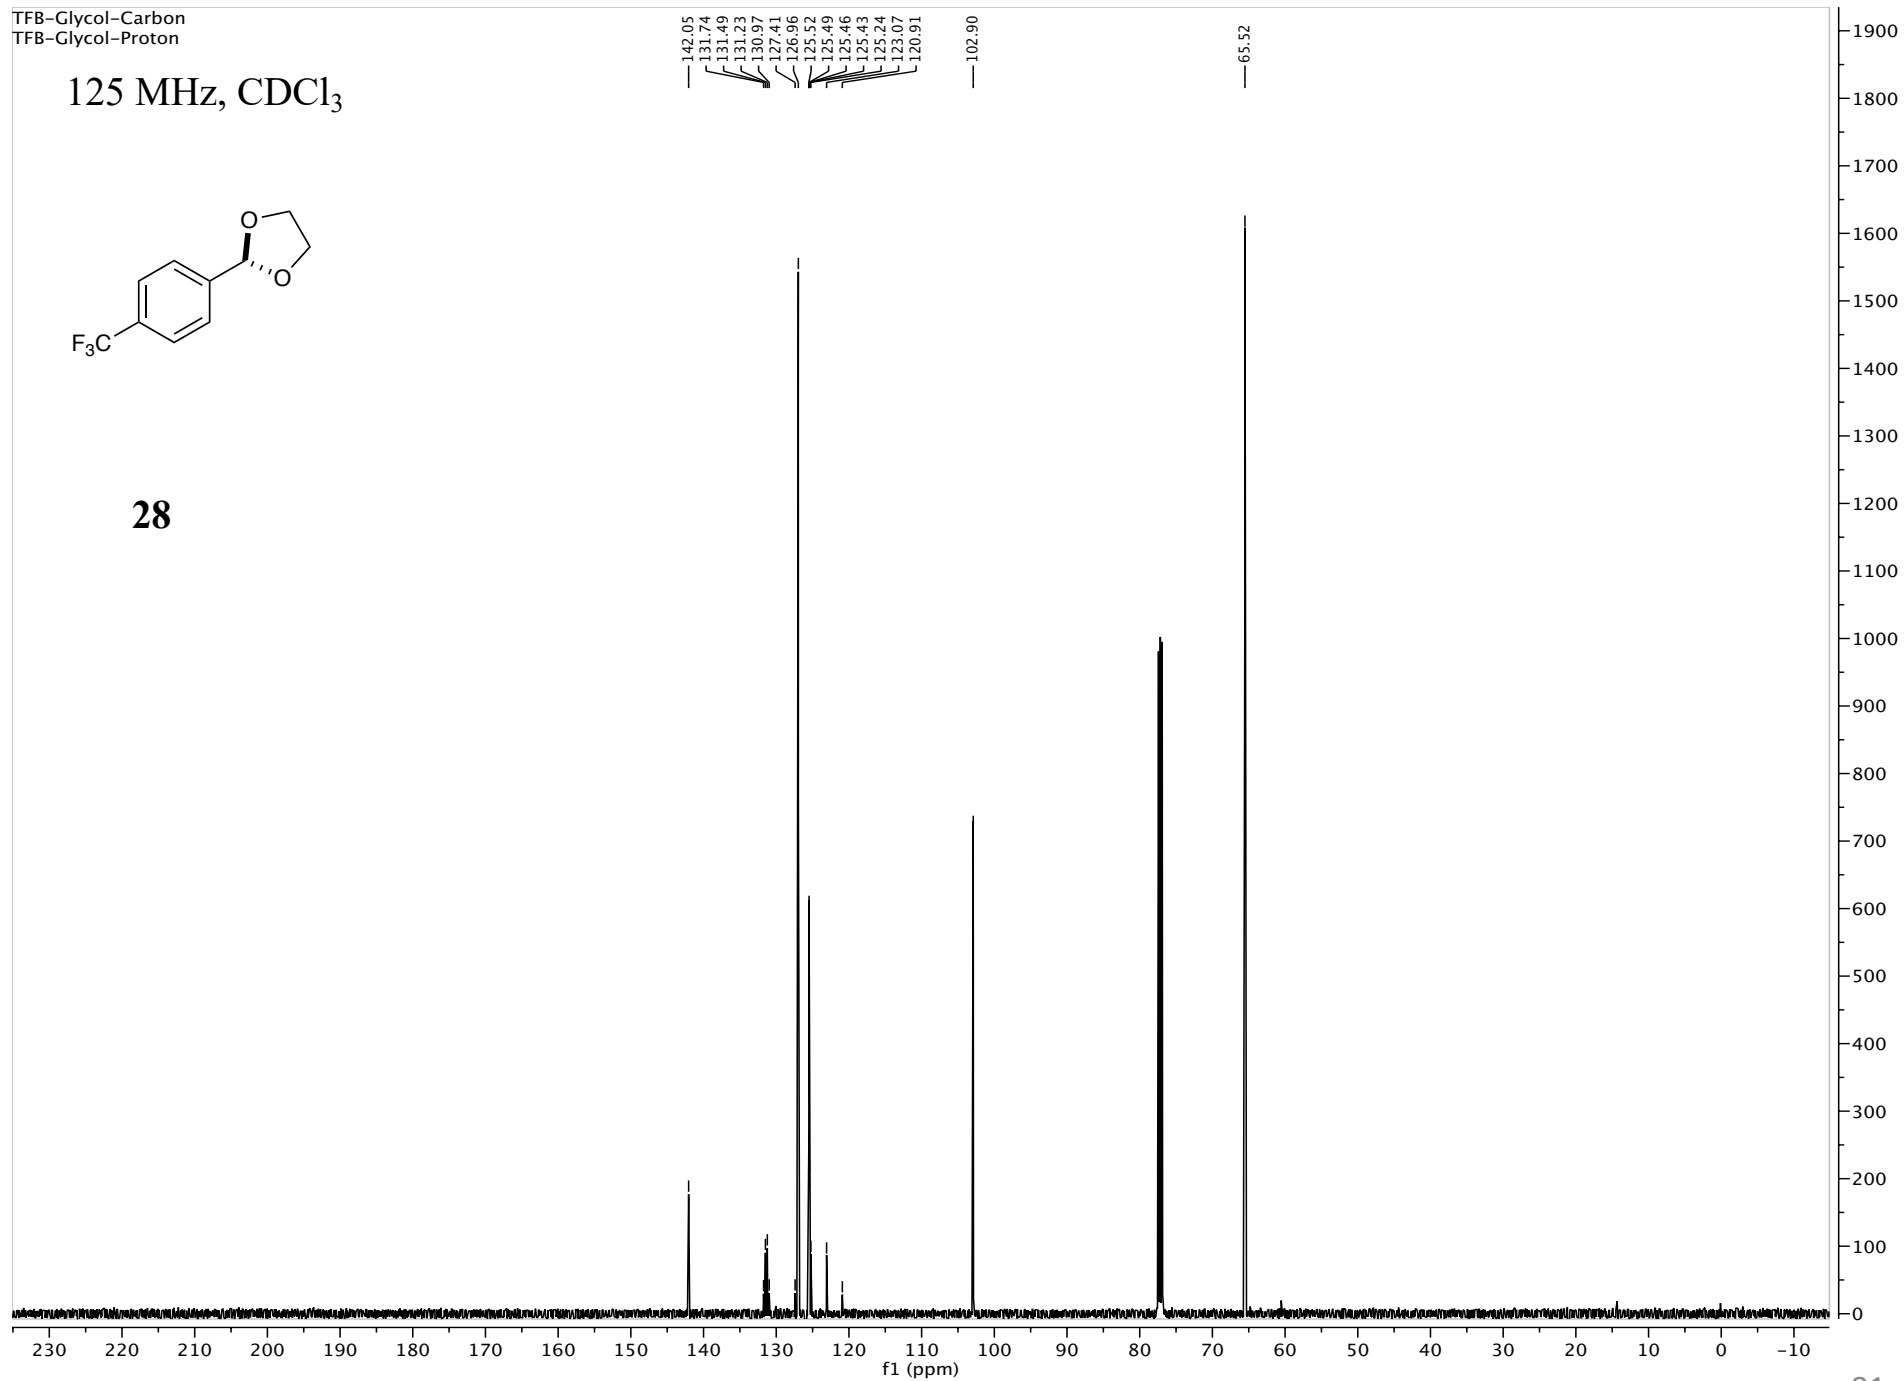

JS3-140-Proton  
JS3-140

500 MHz, CDCl<sub>3</sub>

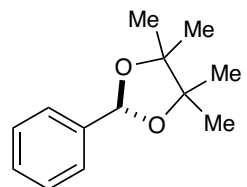

29

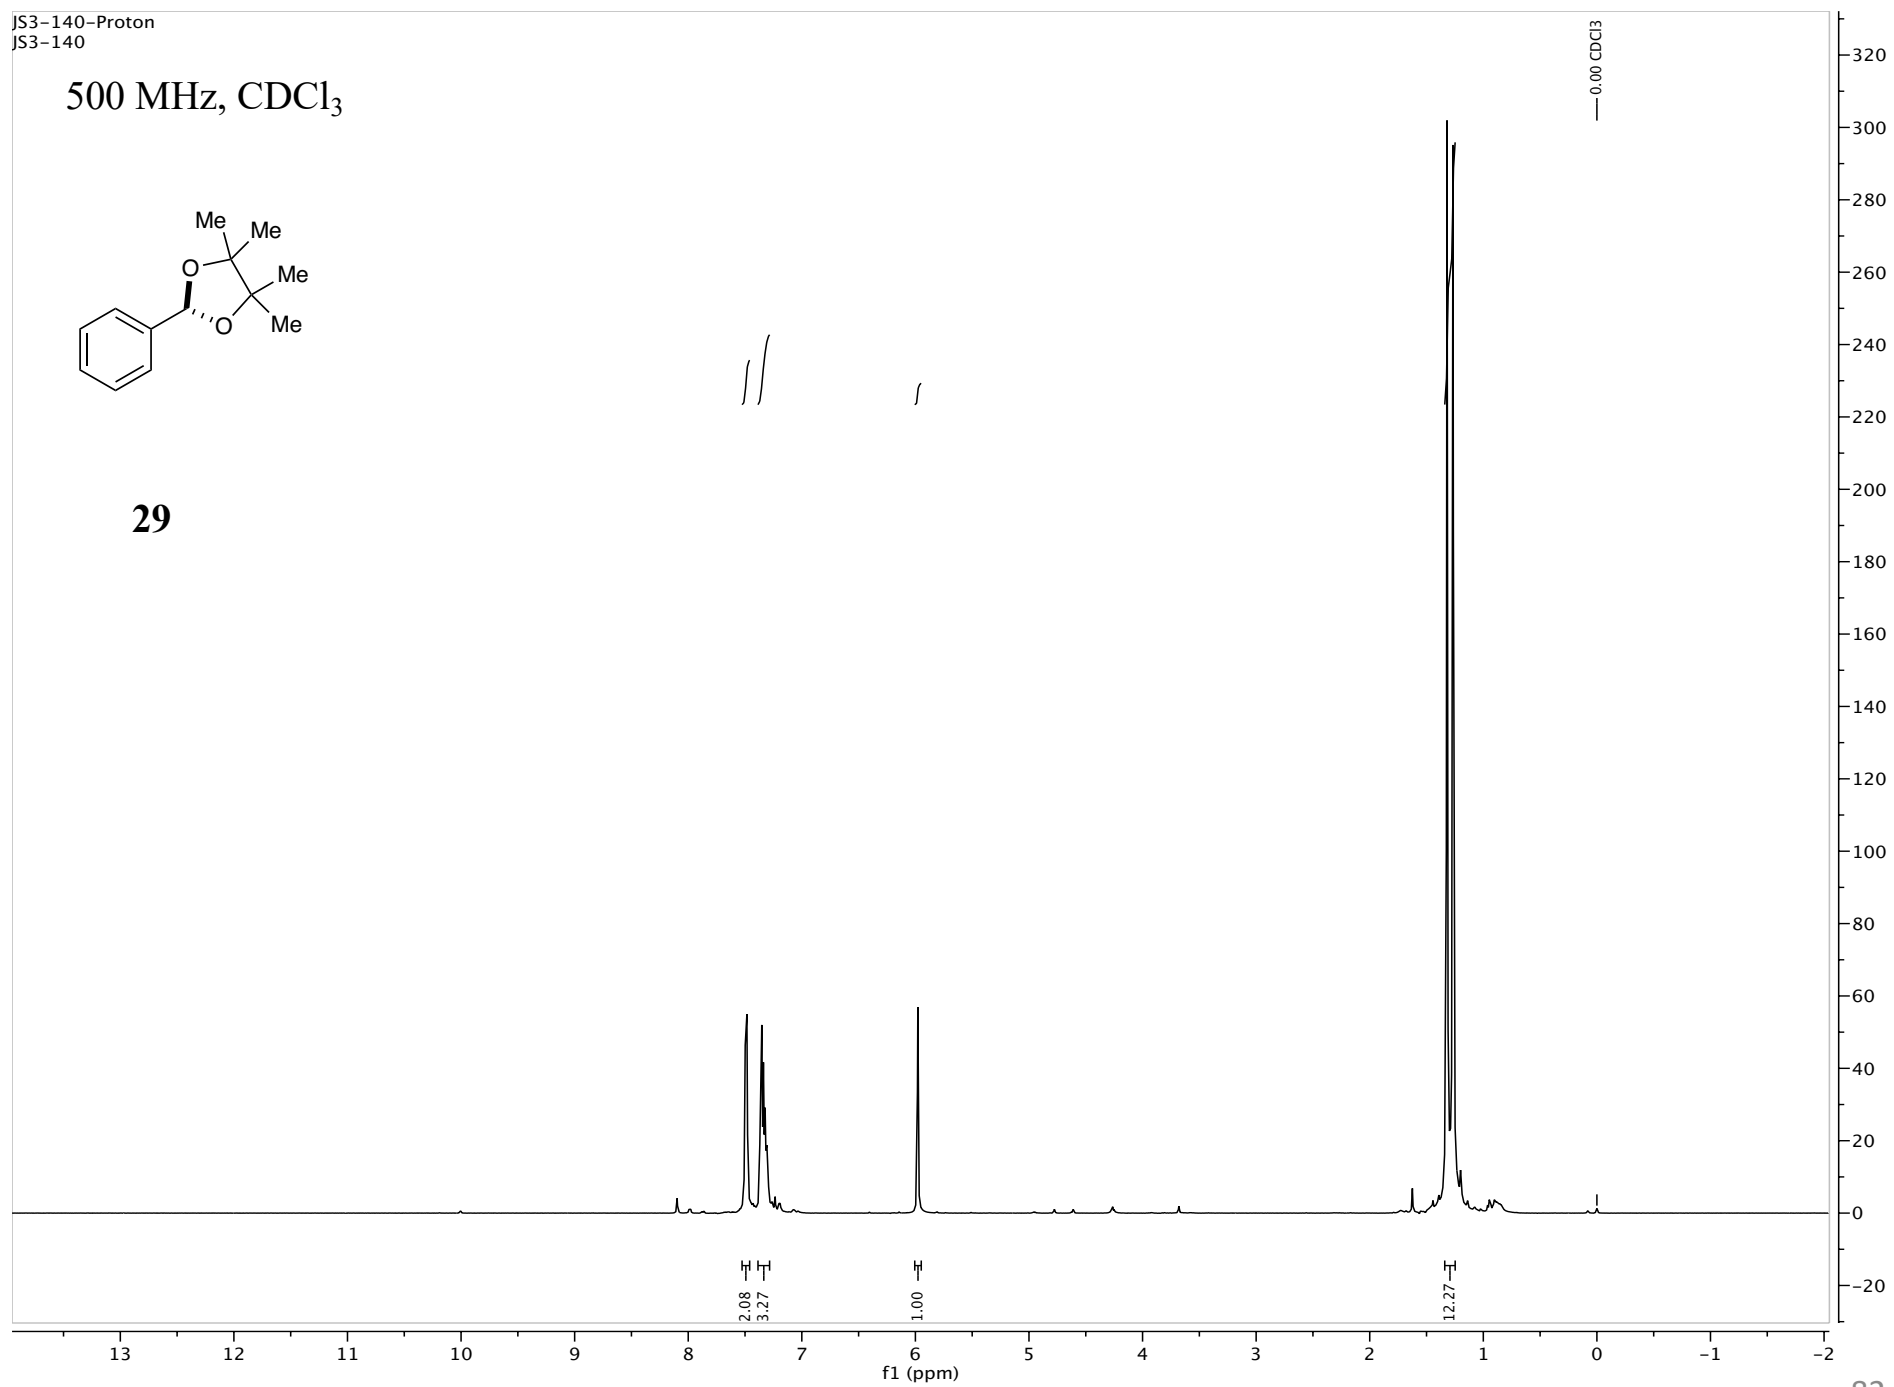

JS3-140-Carbon  
JS3-140

125 MHz, CDCl<sub>3</sub>

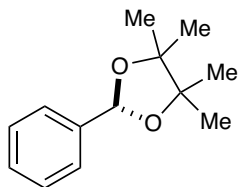

29

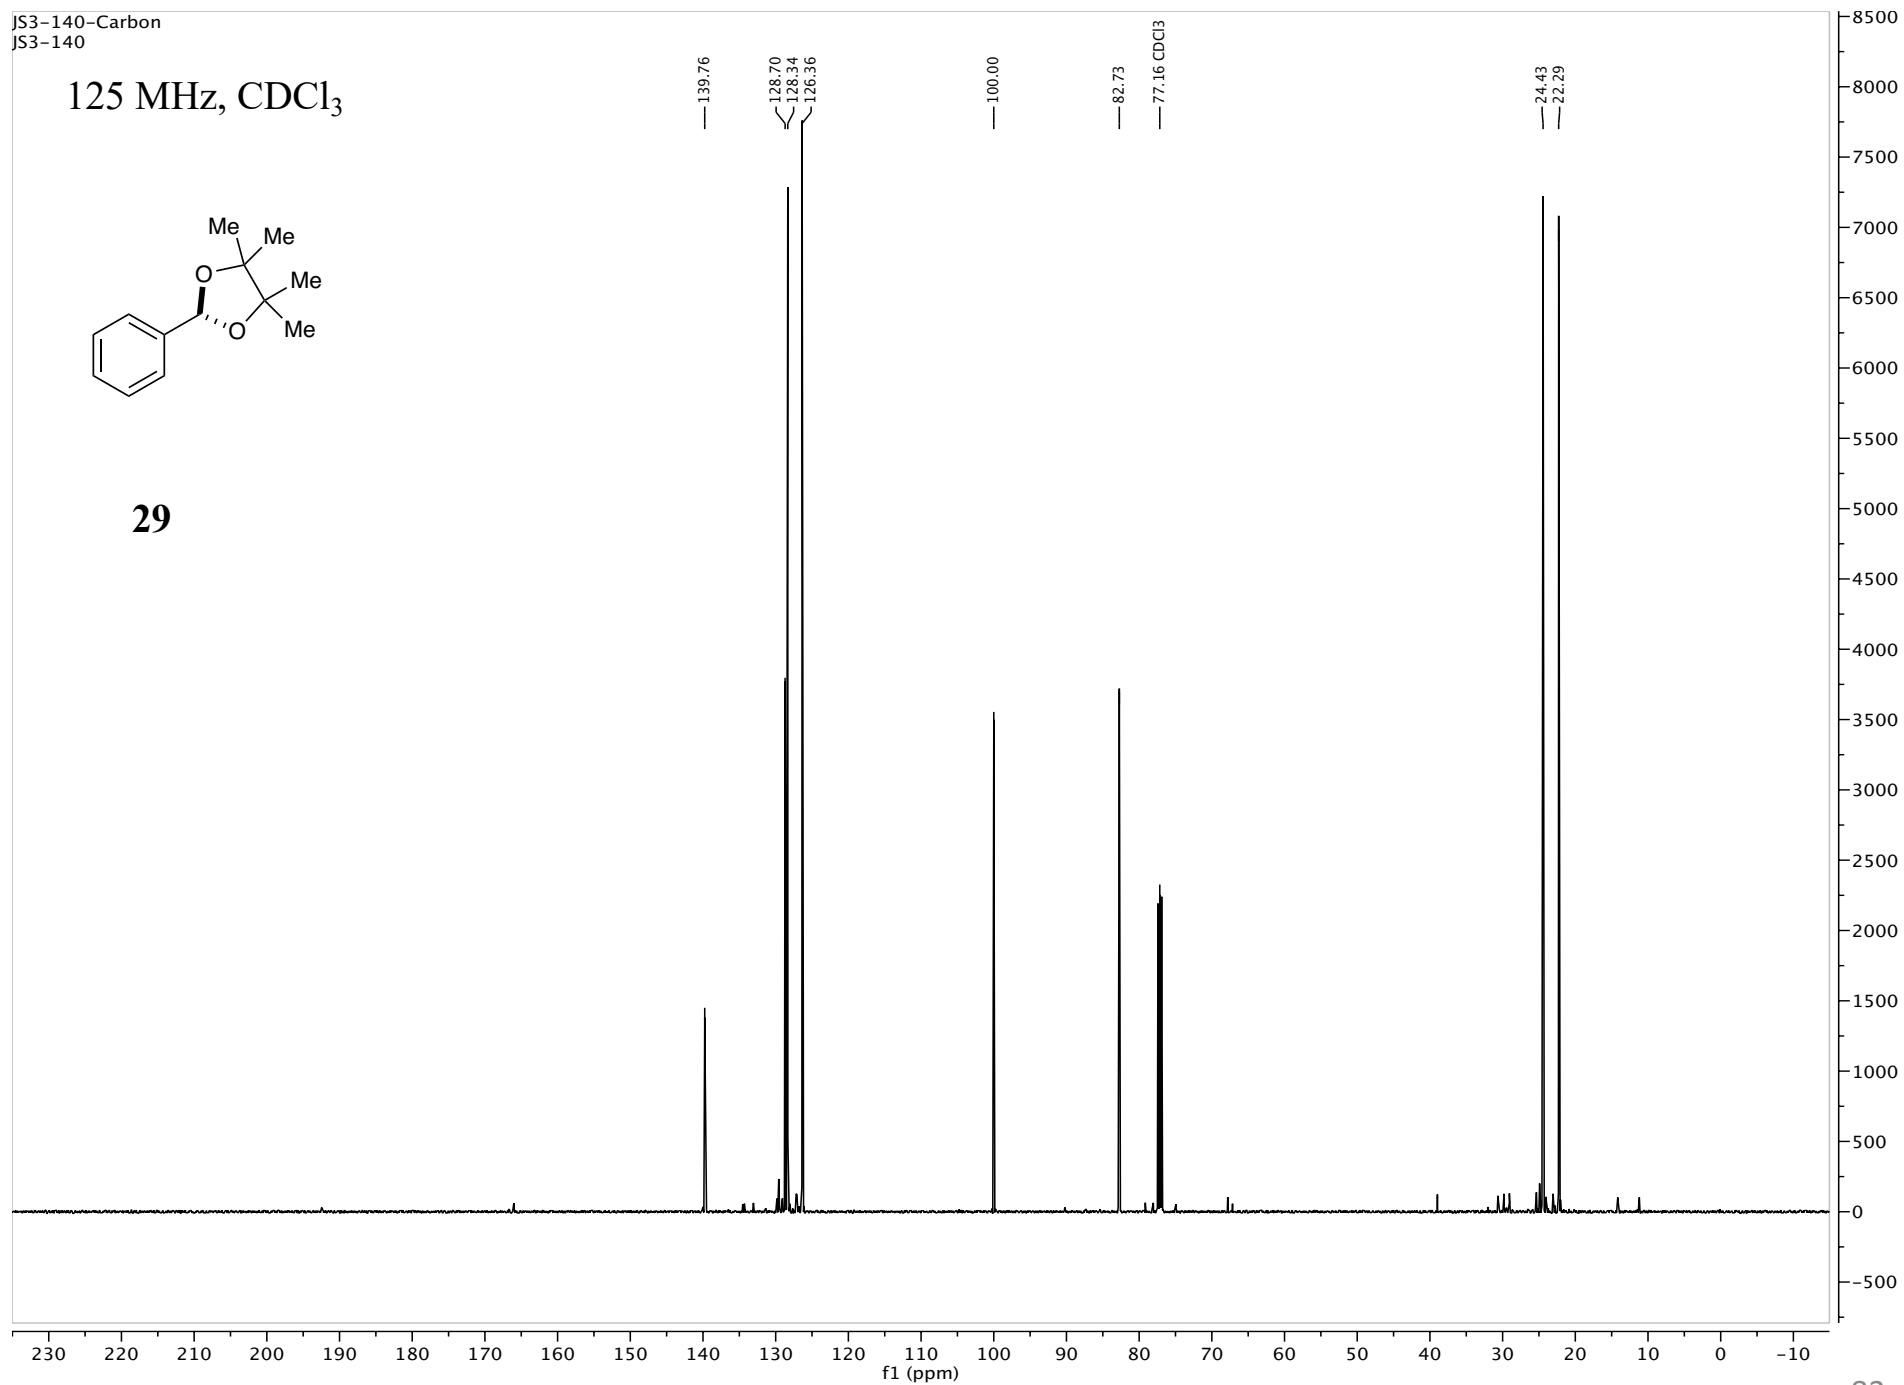

JS-Phen-Cl-Acetal  
Phen-Cl

500 MHz, CDCl<sub>3</sub>

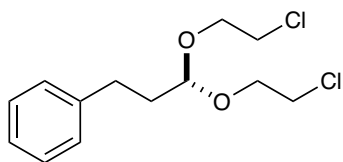

30

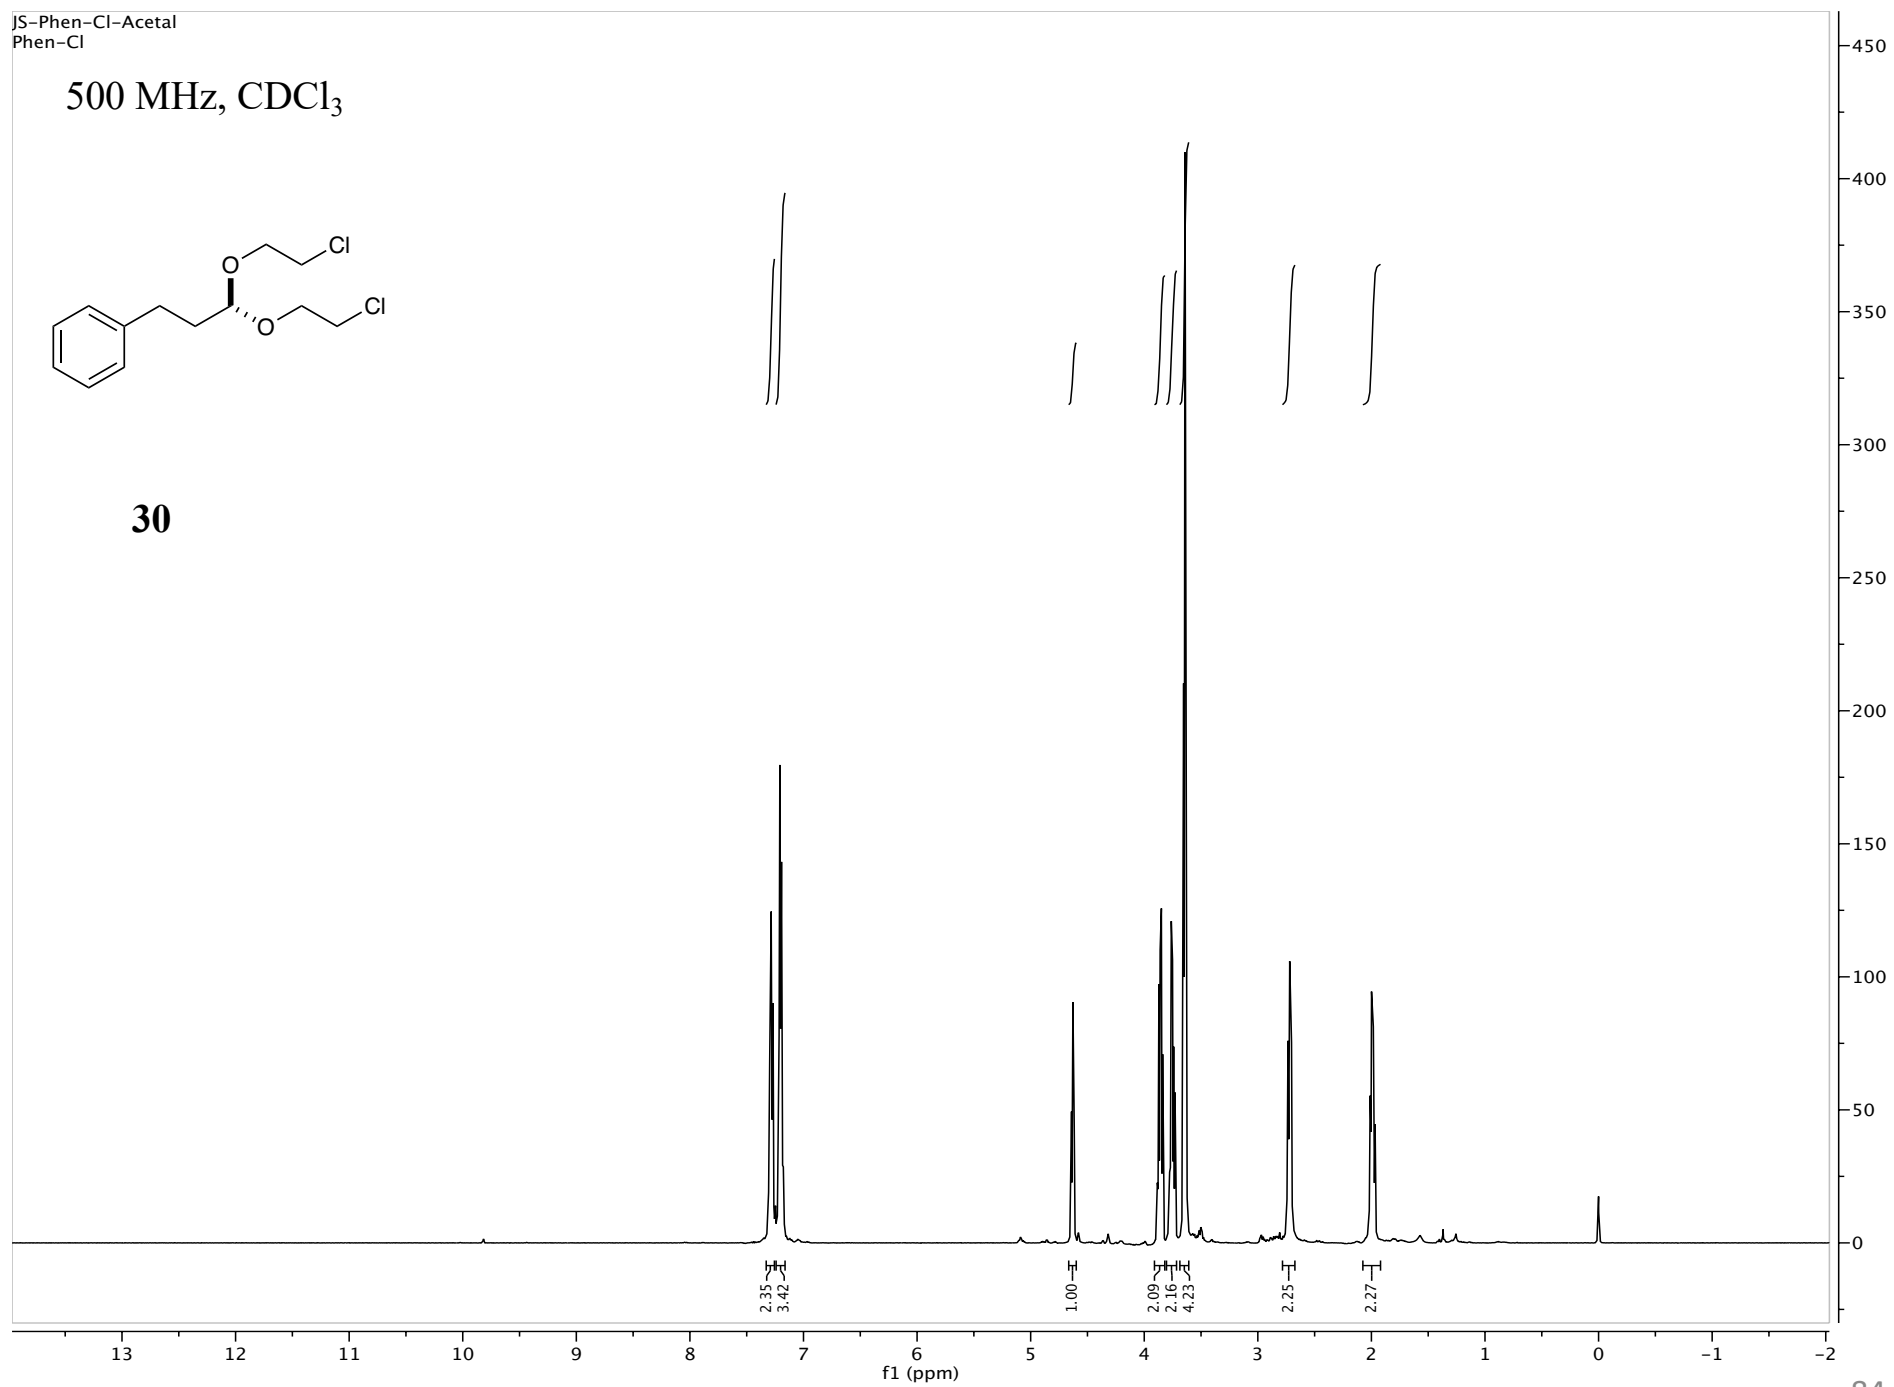

JS3-164-Acetal-Carbon  
JS3-164-Acetal

125 MHz, CDCl<sub>3</sub>

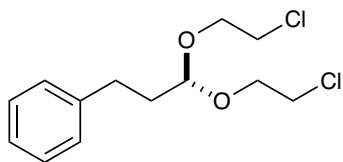

30

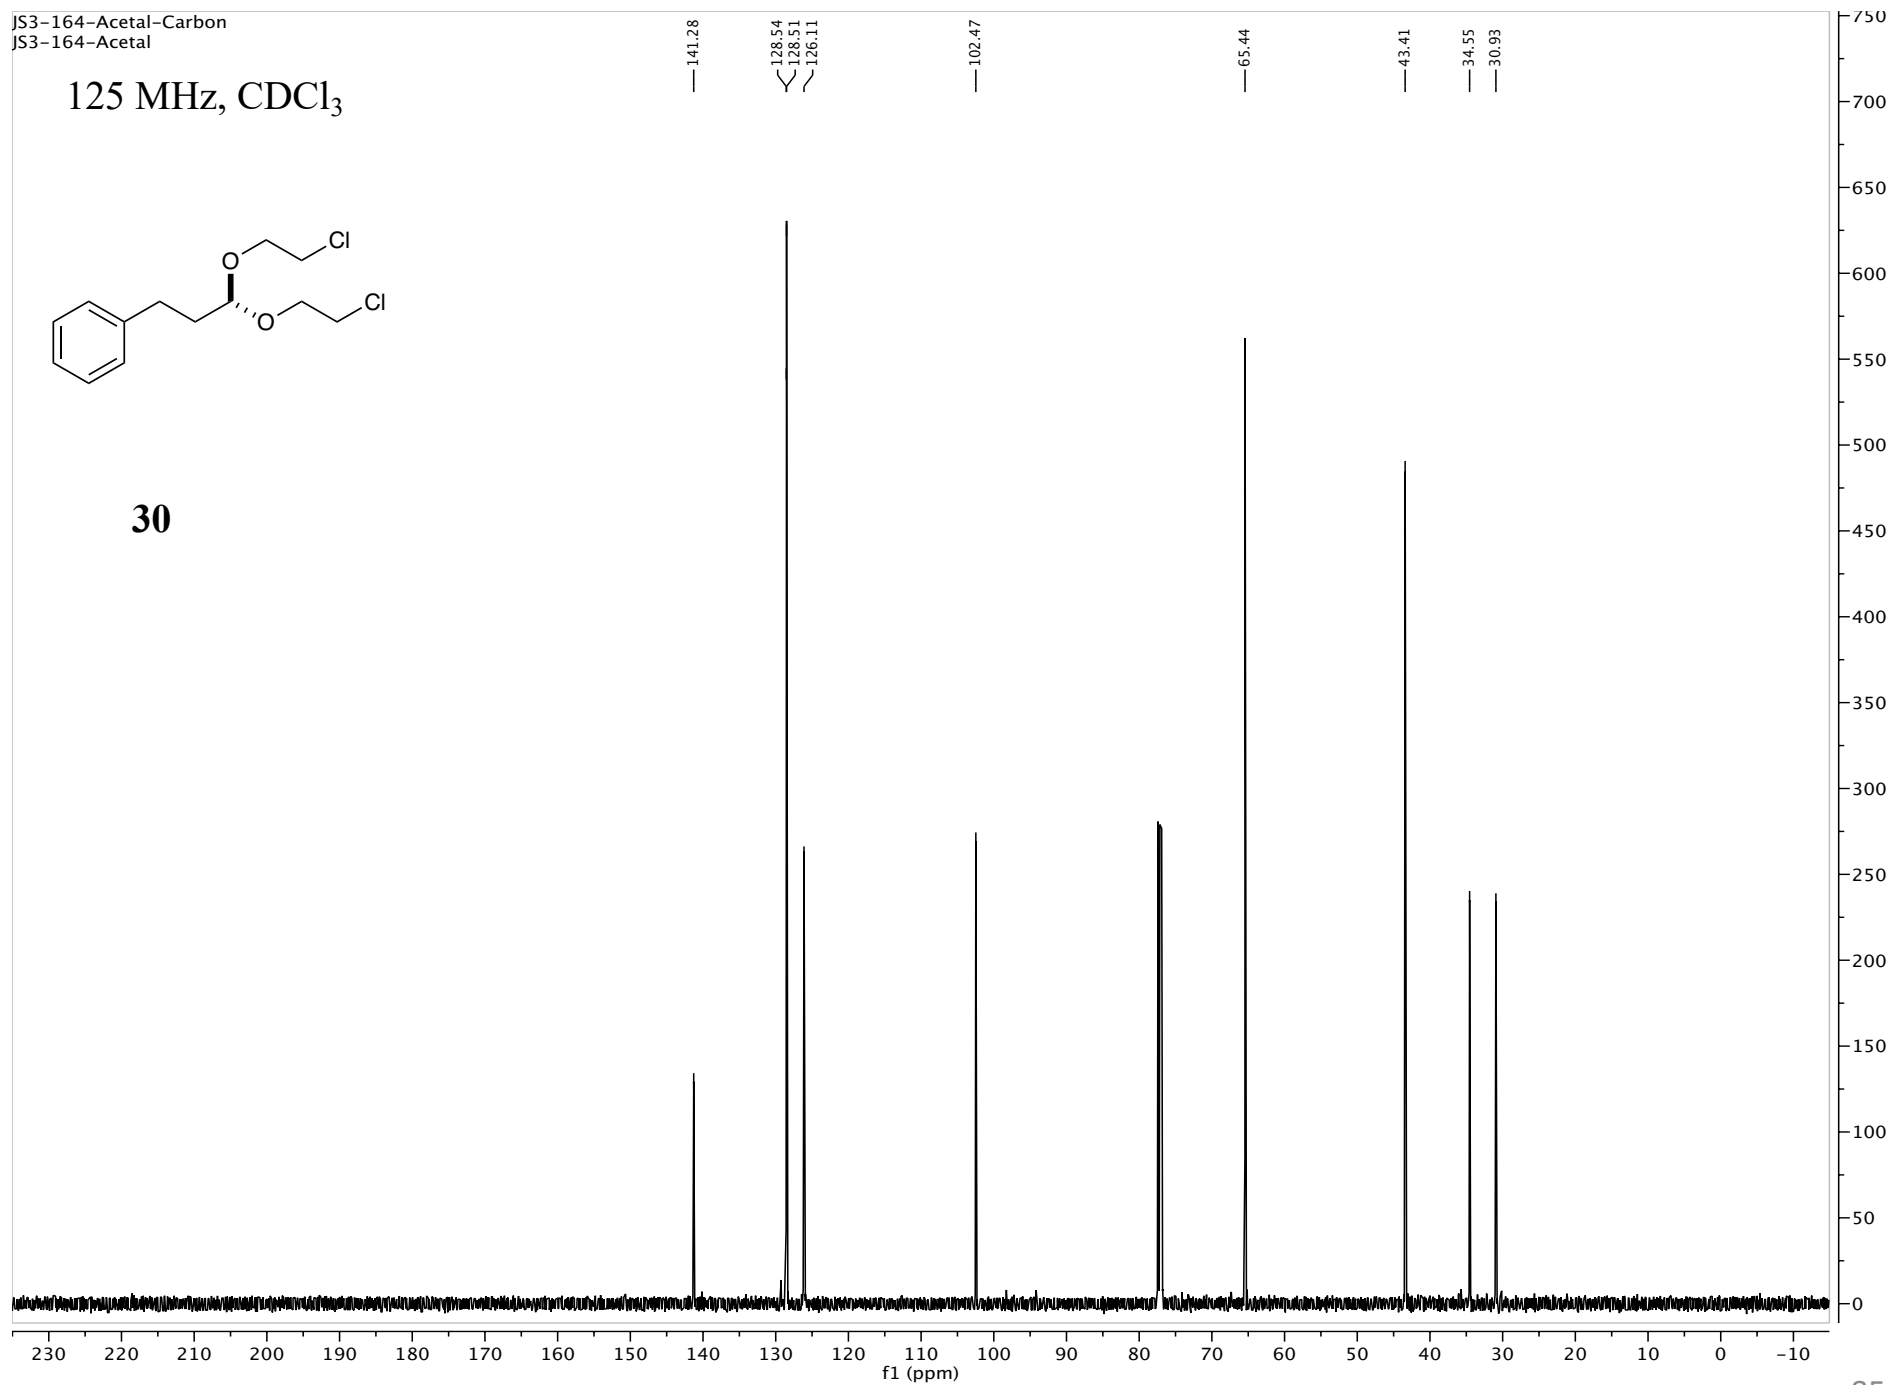

Supplement: d2ob00435f1.pdf [file d2ob00435f1.pdf]
